# A comprehensive investigation of intracortical and corticothalamic models of alpha rhythms

Sorenza P. Bastiaens<sup>1,2</sup>, Davide Momi<sup>2</sup>, and John D. Griffiths<sup>1,2</sup>

<sup>1</sup>Institute of Medical Sciences, University of Toronto

<sup>2</sup>Krembil Centre for Neuroinformatics, Centre for Addiction and Mental Health, Toronto

March 2024

## Abstract

Alpha rhythms are a robust phenomenon prominently observed in posterior resting state electroencephalogram (EEG) that has been shown to play a key role in a number of cognitive processes. However, the underlying mechanisms behind their generation is poorly understood. Here, we showcase the most concrete, mathematically-expressed theoretical foundations for understanding the neural mechanisms underlying the alpha rhythmogenesis. The neural population models of interest are Jansen-Rit (JR), Moran-David-Friston (MDF), Robinson-Rennie-Wright (RRW) and Liley-Wright (LW). Common elements between all models are identified, such as the description of each neural population in the form of a second-order differential equation with a potential-to-rate operator represented as a sigmoid and a rate-to-potential operator usually expressed as an impulse response. Even though these models have major differences, they can be meaningfully compared by associating parameters of analogous biological significance, which we summarize with a unified parameter table. With these correspondences, rate constants and connectivity parameter space is explored to identify common patterns between similar behaviors, such as the role of excitatory-inhibitory interactions in the generation of oscillations. Through stability analysis, two different alpha generation mechanisms were identified: one noise-driven and one self-sustaining oscillation in the form of a limit cycle emerging due to a Andronov-Hopf bifurcation. This work contributes to improving our mechanistic and theoretical understanding on candidate theories of alpha rhythmogenesis.

# Contents

|          |                                                                                               |              |
|----------|-----------------------------------------------------------------------------------------------|--------------|
|          |                                                                                               | 28           |
| <b>1</b> | <b>Background</b>                                                                             | <b>3</b> 29  |
| 1.1      | Overview and aims . . . . .                                                                   | 3 30         |
| 1.2      | The alpha rhythm: origins and theories . . . . .                                              | 5 31         |
| 1.3      | Bridging scales: mathematical modelling of mesoscopic neural population dynamics              | 8 32         |
| 1.4      | Tracing the roots of NPMs: early history . . . . .                                            | 10 33        |
| 1.5      | Classification of NPMs and mathematical characteristics of convolution-based models . . . . . | 13 35        |
| <b>2</b> | <b>Methods</b>                                                                                | <b>15</b> 36 |
| 2.1      | Alpha rhythm models . . . . .                                                                 | 15 37        |
| 2.1.1    | Jansen-Rit model . . . . .                                                                    | 15 38        |
| 2.1.2    | Moran-David-Friston model . . . . .                                                           | 17 39        |
| 2.1.3    | Liley-Wright model . . . . .                                                                  | 19 40        |
| 2.1.4    | Robinson-Rennie-Wright model . . . . .                                                        | 21 41        |
| 2.2      | Simulation, power spectrum, and stability analysis methods . . . . .                          | 25 42        |
| <b>3</b> | <b>Results</b>                                                                                | <b>28</b> 43 |
| 3.1      | Analysis of neural model dynamics . . . . .                                                   | 28 44        |
| 3.1.1    | Characteristics of model-generated alpha activity . . . . .                                   | 28 45        |
| 3.1.2    | Structure of parameter space . . . . .                                                        | 32 46        |
| 3.2      | Comparative evaluation of models . . . . .                                                    | 40 47        |
| 3.2.1    | Topology . . . . .                                                                            | 40 48        |
| 3.2.2    | Equations . . . . .                                                                           | 41 49        |
| 3.2.3    | Unified parameter table . . . . .                                                             | 42 50        |
| 3.2.4    | Deciphering the biological basis and rationale of parameter values . . . . .                  | 43 51        |
| <b>4</b> | <b>Discussion</b>                                                                             | <b>48</b> 52 |
| 4.1      | Summary of main findings . . . . .                                                            | 48 53        |
| 4.2      | Model limitations and critique . . . . .                                                      | 50 54        |
| 4.3      | Alternative models of alpha rhythm beyond NPMs . . . . .                                      | 53 55        |
| 4.3.1    | Two levels down: multicompartamental microcircuit models . . . . .                            | 53 56        |
| 4.3.2    | One level down: spiking neuron network models . . . . .                                       | 54 57        |
| 4.3.3    | One level up: whole-brain NPMs . . . . .                                                      | 55 58        |
| 4.4      | Conclusion and future work . . . . .                                                          | 56 59        |

# 1 Background

## 1.1 Overview and aims

The classical alpha rhythm is an 8-12Hz oscillatory activity pattern that is highly prominent in electroencephalogram (EEG), electrocorticogram (EcoG), and local field potential (LFP) recordings from humans and other species, particularly during states of quiet wakefulness (Fig. 1, A1 and A2). Almost 100 years after its discovery (Berger, 1929), alpha frequency activity remains one of the most robustly observed and broadly significant phenomena in all of neuroscience, yet also one of the most enigmatic (Bollimunta et al., 2011). Alpha plays a fundamental role in a wide range of cognitive processes, and abnormal alpha rhythms are frequently identified in psychiatric and neurological conditions as summarized in Fig. 1, A3 (Bucci et al., 2004; Clancy et al., 2017; Deiber et al., 2020; Jensen and Mazaheri, 2010). However, despite the profound importance of alpha rhythms - both in terms of their undeniable prominence in empirical EEG data, and their implication across a broad range of phenomena across clinical and cognitive neuroscience, their mechanistic physiological basis and functional significance remains unclear. Several theories of alpha rhythmogenesis have been proposed over the years, often emphasizing different physiological substrates such as recurrent activity and excitatory-inhibitory interactions in cortical column microcircuits, or delayed inhibitory feedback within cortico-thalamocortical loops (Fig. 1, B2). There have however been relatively few attempts to evaluate and compare in detail these alternative theories in conjunction, and thereby arrive at a useful synthesis of the most compelling accounts. Developing such a synthesis is a principal aim of the present study.

A central criterion around which we base this investigation is the requirement that the models of interest should be expressed in concrete mathematical language, as well as being implemented in numerical simulations and/or quantitative analytic computations. Specifically, we consider a particular type of neurophysiological model - neural population models (NPMs) (Fig. 1, C1) - that have been used extensively over the past half century as a tool to better understand alpha activity (Lopes da Silva and Van Leeuwen, 1977; Grimbert and Faugeras, 2006b; Jansen and Rit, 1995; Liley et al., 2001; Bhattacharya et al., 2011; David and Friston, 2003; Hartoyo et al., 2019; Robinson et al., 2003). We focus on four extensively studied NPMs that are commonly used to describe EEG alpha activity in the neuroimaging, neurophysiology, and computational neuroscience literature. We refer to these as the Jansen-Rit (JR; Jansen and Rit 1995), Moran-David-Friston (MDF; David and Friston 2003; Moran et al. 2007), Liley-Wright (LW; Liley et al. 1999, 2001), and Robinson-Rennie-Wright (RRW; Robinson et al. 2002, 2003) models. These shorthand terms reference certain key individuals who contributed to the conception and/or development of several prominent strands in the research literature. We do note however that they are imperfect ones - both because all of the models studied here build directly on the earlier work of other important theoreticians (e.g. Freeman, Zetterberg, Lopes Da Silva, Cowan, Nunez), and also in some cases each other (e.g. MDF is an indirect extension of JR). We begin over the next few sections with a description of general elements present in the

JR, MDF, LW, and RRW models, and a summary of their individual characteristics. Direct 99  
comparisons between each of them are then made, first in the context of the alpha regime, 100  
and then extending into other oscillatory regimes at non-alpha frequencies. A central objective 101  
in this work is to identify common patterns between the models, using numerical simulations 102  
and linear analysis across a broad parameter space to identify the effects of rate constants, 103  
inter-population connectivity structure, and other factors on oscillatory dynamics. These sim- 104  
ilarities and differences across models constitute the points of agreement and divergence across 105  
current theories of alpha rhythmogenesis, and it is the mapping of this theoretical landscape 106  
that is our main aim in the present paper. The origin, biological significance, and validity of 107  
their parameters, as well as the functional forms of their equations, are also considered when 108  
discussing the respective limitations and advantages of each candidate model. 109

## A. BIOLOGICAL INFORMATION

### A1) EEG time series

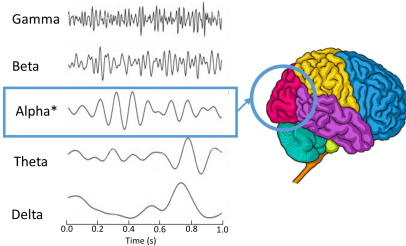

### A2) Frequency domain

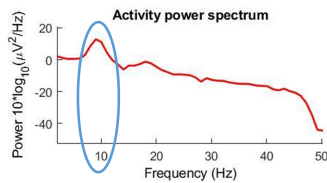

### A3) Significance of Alpha oscillations

#### Cognitive roles

##### Sensory perception

- Alpha phase predicts visual perception
- Alpha frequency linked to temporal resolution of perception

##### Attention

- Role as an attentional suppression mechanism

##### Functional inhibition

- Role in effective inhibition of task-irrelevant regions for gating information

##### Working memory

- Complex role in different aspects of WM for different types of alpha

#### Disease implications

##### OCD

- Decrease in alpha rhythm

##### Chronic anxiety

- Decreased activity in alpha rhythm

##### PTSD

- Asymmetry of alpha rhythm
- Increased activity of right parietal lobe

##### ADHD

- Alpha changes in posterior, central and frontal part

## B. THEORIES

### B1) Pacemaker

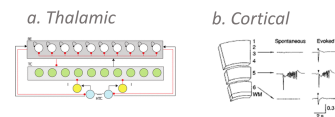

### B2) Loops\*

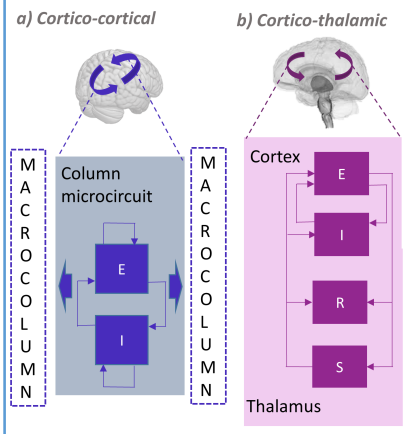

### B3) Eigenmodes

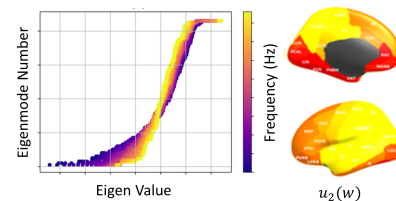

## C. MODELLING

### C1) Neural Mass Models\*

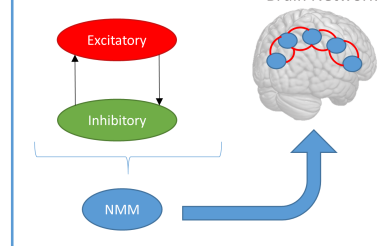

### C2) Neural Field Models = NMM + Spatial component

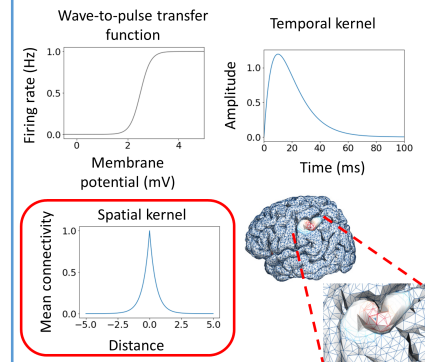

### C3) Spiking neuron model

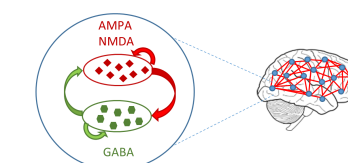

\*: Main focus of paper

**Figure 1. Overview of steps leading to neural population models of alpha oscillations.** **A)** Alpha oscillations are most strongly observable in the occipital lobe of the cerebral cortex (A1), where they are characterized by a peak in the power spectrum between 8-12Hz (A2). Panel A3 summarizes the role alpha plays in cognitive processes, as well as abnormal alpha rhythm features observed in various diseases. **B)** Summary of the different theories that have been proposed to explain the alpha rhythm. We focus on theories emphasizing the importance of interactions between neural populations (B2). **C)** Alpha rhythm theories are clarified and concretized by mathematical formulations, allowing numerical and analytical investigation of their predictive and explanatory scope. The principal class of models used to date are neural population (neural mass and neural field) models (C1 and C2), which are the focus of the present work.

## 1.2 The alpha rhythm: origins and theories

Neural oscillations are repetitive, quasiperiodic patterns of brain activity that are believed to play a key role in various sensory-cognitive processes (Başar, 2013). In humans, oscillations are most commonly studied with EEG, a non-invasive neuroimaging modality that uses scalp-recording electrodes to capture large-scale neuroelectric activity with high temporal resolution. EEGs measure differences in electrical potential between recording and reference electrodes on the scalp that results from summed postsynaptic dipoles in the brain. In order to quantify oscillatory activity, the measured signal is typically decomposed into its power spectrum frequency components via Fourier transform, and often aggregated into canonical frequency bands (delta: 110 111 112 113 114 115 116 117 118)

1-4Hz, theta: 4-8Hz, alpha: 8-12Hz, beta: 12-35Hz, gamma: above 35Hz) for further analysis (Abhang et al., 2016).

Alpha waves, usually defined as the EEG frequency band between 8 and 12 Hz (Moini and Piran, 2020), are associated with quiet wakefulness, meditation, relaxation and reflection (Halgren et al., 2019). In the EEG recording, they are most prominent in the occipital lobe of the cortex when the subject is awake with eyes closed during resting state (Klimesch, 1999). Their role is believed to be fundamental for a number of top-down cognitive processes (Halgren et al., 2019) such as sensory perception (Samaha and Postle, 2015), attention (as an attentional suppression mechanism Foxe and Snyder 2011), functional inhibition (Jensen and Mazaheri, 2010) working memory (Wianda and Ross, 2019) and long-term memory (Klimesch, 2012). Abnormal EEG rhythmic patterns, including aberrant alpha oscillations, are indicative of atypical bioelectrical activity that may suggest the presence of cognitive and/or mental disorders. Thus, robust resting state alpha activity is considered an indicator of healthy cognitive functioning. Reduced alpha power or lowered alpha peak frequencies resulting from aging, head trauma, or exposure to toxins may be correlated with a neurological disorder or brain impairment, such as traumatic brain injury (TBI), or dementia (Scally et al., 2018; Buchanan et al., 2021). Both the power and topography of the alpha rhythm is altered in epilepsy patients (Abela et al., 2019). Several psychiatric conditions are also associated with a decrease in activity in the alpha rhythm, namely chronic anxiety (Fingelkurts et al., 2006; Roohi-Azizi et al., 2017), and obsessive compulsive disorder (OCD), sometimes accompanied by concomitant changes at theta and beta frequencies (Karadag et al., 2003). Asymmetry of the alpha rhythm and increased activity of the right parietal lobe is observed in patients experiencing post-traumatic stress disorder (PTSD) (Metzger et al., 2004; Roohi-Azizi et al., 2017). A comprehensive survey of the vast research literature on alpha in cognitive and clinical neuroscience is beyond the scope of the present work; for this we refer the reader to excellent recent treatments by Ippolito et al. (2022); Başar and Güntekin (2012)

Although the alpha rhythm was the first rhythmic wave identified and named by Hans Berger in 1929 (Berger, 1929; Tudor et al., 2005), and it is considered the predominant oscillation in the human brain (Klimesch, 2012) with significant implications in empirical EEG data and various clinical and cognitive neuroscience studies, the physiological mechanism underlying its generation and functional significance remain poorly understood. Unlike other characterized brain oscillations, such as beta and gamma waves, whose neural circuitry relies on local connectivity (Lozano-Soldevilla, 2018), the generation of alpha rhythm is thought to involve contributions from both cortical and thalamic regions, which can influence and interfere with each other, suggesting an elaborate neural circuitry (Lozano-Soldevilla, 2018; Lopes da Silva, 1991). Several hypotheses have been proposed regarding the composition and mechanistic organization of these alpha circuits, which can be grouped under three categories: *pacemaker*, *local network*, and *global network* theories. The pacemaker theory suggests that intrinsic alpha oscillations are generated either in the thalamus, driven by pulvinar or and/or the lateral geniculate nucleus (Saalman et al., 2012; Lőrincz et al., 2009; Hughes et al., 2011) or in the

cortex, originating from the pyramidal cells located in layer V (Lopes da Silva, 1991; Connors and Amitai, 1997; Bollimunta et al., 2008). However, pacemaker theories in general suffer from several severe limitations (see Nunez et al. 2006 for an extensive discussion of this). For instance, pacemaker cells such as putative thalamic nuclei, if they exist, would have to function in a relatively autonomous fashion, having a highly restricted input from other oscillatory brain regions - a notion that has been critically questioned on anatomical grounds (Lopes da Silva, 1998; Steriade, 2005). Additionally, there are certain global EEG phenomena that remain unexplained, including the relative frequencies of major rhythms and sleep-wave variations. The second category, ‘local network’ theories, propose that alpha rhythms are produced by interactions between excitatory and inhibitory neural populations with dendritic response functions and saturating nonlinearities (Valdés-Hernández et al., 2010). Finally, ‘global network’ theories posit that alpha rhythms are generated by large-scale networks rather than local circuits within a localized brain region. By disregarding complex dendritic response functions and finite intracortical propagation, models with a primary emphasis on global dynamics rely heavily on the propagation delays between distant anatomical structures to shape their dynamics (Nunez and Cutillo, 1995; Nunez and Srinivasan, 2006; Valdés-Hernández et al., 2010). Of these three categories, local network theories are the most established and extensively studied, and will serve as the major emphasis in the present work. Specifically, we examine in detail two prevailing local network theories of alpha rhythmogenesis:

1. Alpha oscillations are generated by recurrent activity and excitatory-inhibitory interactions within cortical column microcircuits.
2. Alpha oscillations are generated by delayed inhibitory feedback within corticothalamo-cortical loops.

These two accounts describe the origin of alpha waves as a phenomenon relying on dynamics of local networks of interconnected neural populations, and thus occurring at the *mesoscopic* spatial scale. Computations underlying brain functions such as action, perception, learning, language and higher cognition are hypothesized by some to operate from neural ensembles at this scale (Deco et al., 2008). Current technologies allow us to measure the macroscale (EEG, MEG, fMRI, ECoG) or the microscale (single cell recording, fluorescence calcium imaging, multi-electrode arrays), but the mesoscopic scale is more challenging to directly observe, particularly in humans *in vivo*. To bridge the gap between scales and explore the underlying mechanisms of alpha rhythmogenesis, mathematical models of neural networks replicating EEG phenomena observed empirically are particularly useful. The class of computational neural models that simulate neural activity directly at the mesoscopic level are known as neural population models (NPMs).

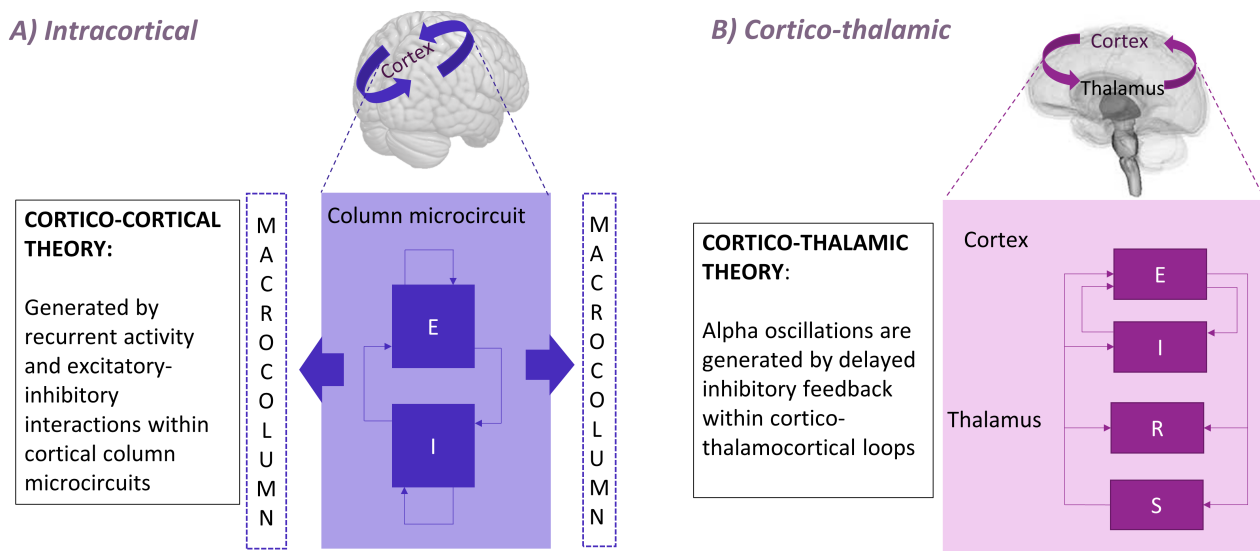

**Figure 2. Schematic depiction of two candidate theories of alpha rhythmogenesis. A)** Cortico-cortical columnar microcircuit model, representing the generation of alpha rhythm through interconnected macrocolumns. **B)** Cortico-thalamic model, involving thalamic neural populations in the process of alpha genesis.

### 1.3 Bridging scales: mathematical modelling of mesoscopic neural population dynamics

Mathematical expressions of human brain activity have provided significant insights into the hidden mechanisms of the underlying neural processes at multiple scales (Deco et al., 2008). To construct models at the intended level of granularity, there are two main approaches: 1) a ‘bottom-up’ approach, beginning at the sub-cellular level with flows of ions and action potential generation at small patches of neuronal membrane (typically using Hodgkin-Huxley or Rall model equations), or at the whole-cell level (e.g. using Izhikevich or Leaky Integrate-and-Fire model equations); or 2) a ‘top-down’ approach, which represents the collective activity of neurons sharing some common characteristics, such as the type of synapses they connect to (excitatory or inhibitory) instead of focusing on individual cells (Cook et al., 2021; Cooray et al., 2023). While the former approach is a closer representation of biological neurons with finer details, it is often inadequate for modelling empirical phenomena emerging from large-scale brain activity, as the complexity rapidly increases with the number of neurons involved, resulting in interpretability and computational issues (Cook et al., 2021). Since our investigation focuses on the alpha rhythm, we prioritize models that take a ‘top-down’ approach in our study, and provide a systems-level perspective which can give a more holistic understanding of alpha rhythm and its functional significance.

The top-down perspective, based on the concept of neural ensemble dynamics (Breakspear, 2017), assumes that the activity of each individual neuron is negligible at large spatial scales. Instead, the aggregate activity of a population of neurons with a common type of synaptic connectivity (i.e. excitatory or inhibitory) is considered, and the states of neurons across the



ensemble are assumed to be uncorrelated. This approach, which is followed by all NPMs, is particularly useful for modelling oscillatory activity such as the alpha rhythm, since the spatial scales of the variables are equivalent to the physical coverage of an individual EEG channel ( $\text{mm}^2 - \text{cm}^2$ ) and so can be understood as approximating local field potentials (Coombes et al., 2014; Evertz et al., 2022).

NPMs therefore represent a mesoscale formulation that aims to capture the emergent properties of collective activity within a patch of neural tissue. In the literature, the term NPM is used with varying interpretations. In our context, NPMs encompass a range of large-scale computational models namely neural mass models, mean-field models, and neural field models (Deco et al., 2008; Bojak, 2014). Models following the ensemble approach can be further reduced by assuming a diffusion approximation (Coombes and Byrne, 2019; Deco et al., 2008). In this formulation, the neural population activity is then defined as a standard normal probability distribution, and is completely characterized by the mean and variance of the firing rate (Breakspear, 2017). Dynamics expressed as a linear, normally distributed ensemble can be described using the Fokker-Planck equations. For a more detailed description of these equations and models of large-scale brain dynamics, we refer the reader to Breakspear (2017). If strong coherence is assumed between neurons, the activity of the ensemble is sufficiently close to the mean that the variance becomes fixed, reducing the number of dimensions. NMMs can be understood as a special case of the Fokker-Planck equations where the variance is fixed, and the mean remains variable. They are then able to represent the coarse-grained activity of large populations of neurons and synapses with a small number of equations (Jansen and Rit, 1995; Lopes da Silva et al., 1974; Breakspear, 2017). NMMs are the simplest type of NPM capable of describing the change in firing rate of neural populations without spatial information and spatiotemporal time delays, providing a succinct yet biophysically meaningful description of brain activity at the mesoscopic scale (Spiegler, 2012; Cook et al., 2021). The main advantage of NMMs is that the simplification of the dynamics reduces the number of dimensions or differential equations that need to be integrated, enabling us to hone in on the behavior of a large number of ensembles and more clearly understand their dynamics (Deco et al., 2008). Furthermore, complex systems may exhibit emergent behavior that cannot be explained solely by the behavior of individual components, but rather arises from the collective interactions and relationships among them (Breakspear, 2017). Thus, rules governing the behavior of a complex system may differ from those at lower levels of organization, as the system as a whole can be more than the sum of its individual parts (Moran et al., 2011). The aim is to propose a model that is balanced between mathematical tractability and biological plausibility (Spiegler, 2012).

Since NMMs assume a point mass, they evolve in time but not in space, unlike neural field models (NFM) which include a spatial component by considering the cortex as smooth sheet, supporting waves of propagating activity (Pinotsis et al., 2014; Breakspear, 2017) usually expressed in the form of a damped wave equation allowing the description of the activity over the entire cortex. When spatial uniformity is assumed in a NFM, the model can be likened to a NMM. Simulation of whole-brain activity with NMMs can also be achieved by coupling

neural masses according to a weighted connectivity matrix representing the strength of the anatomical connections, known as the connectome, often estimated with diffusion-weighted MRI data (Breakspear, 2017; Schirner et al., 2018; Glomb et al., 2021). Each node corresponds to a NMM depicting a brain region to collectively form an integrated brain network model.

Alpha oscillations have been successfully simulated with both NPM (NMM and NFM) and have been studied to shed light on the complex dynamics of neural systems. In the following paragraph, we discuss early pioneers of NMMs and NFMs who have greatly influenced current models in terms of structure, parameter values, and implementation.

## 1.4 Tracing the roots of NPMs: early history

The notion of neural *masses* was introduced in various forms during the 1950s and 1960s (Beurle, 1956; Griffith, 1963), and consolidated in the 1970s primarily through the highly influential work of Freeman, Wilson & Cowan, Amari, and Nunez. It was Freeman who originally used the term ‘neural mass action model’ (Freeman, 1972a,b, 1975), articulating many of the neurobiological and mathematical fundamentals as they are understood today in a wide-reaching monograph on the subject (Freeman, 1975). Here, Freeman also develops the theory of ‘K-sets’ which are based on a hierarchy of interacting sets of neural populations or masses, and used to model neural population dynamics with ordinary differential equations (ODEs) to simulate mesoscopic local field potentials (Deschle et al., 2021). The levels are designated as K0, KI, KII, and KIII, with the K0 set corresponding to a model characterized by non-interactive collections of neurons with globally common inputs and outputs, KI to pairs of interacting K0 sets, and so on. Freeman’s research on the olfactory bulb and prepyriform cortex of cats and rabbits (Freeman, 1979, 1975) provides valuable experimental data that has been used to define mathematical formulations and parameter settings in many NMMs, which is further discussed in section 3.2.4. Furthermore, Freeman’s contributions on the use of the sigmoidal operator for mapping membrane potential to firing rate remains a critical component of many NMMs, the validity of which will be elaborated on in section 4.2. Even though Freeman coined the term neural masses and laid much of the groundwork, many of the core mathematical principles of NMMs were first proposed in the work of Wilson & Cowan (WC; Wilson and Cowan, 1972), which itself builds upon earlier work by Beurle (1956). WC’s implementation introduced and solidified an approach to modelling neural dynamics and brain function. This approach consists of analyzing the collective properties of a large number of neurons using methods from statistical mechanics rooted in the mean-field framework (Destexhe and Sejnowski, 2009; Chow and Karimipناه, 2020). By omitting potential spatial arrangement of synaptic connections, their model offers a minimalistic NMM representation that has been leveraged to develop several simple yet biophysically plausible models (eg Kilpatrick, 2013; Sanz-Leon et al., 2015). As shown in Fig. 3, the canonical WC model consists of two neural masses with one excitatory and one inhibitory population (Wilson and Cowan, 1972; Sanz-Leon et al., 2015). Two nonlinear ODEs describe the dynamics of those two synaptically coupled populations in the neocortex

(Nakagawa et al., 2014; Cowan et al., 2016). The WC system is thus a coarse-grained description of the overall activity and mesoscale neuronal network structure of a patch of (usually cortical) tissue, as is typical of NPMs. By varying the connectivity strength and the input strength to each population, it is possible to generate a diversity of dynamical behaviors that are characteristic of observed activity in the brain, such as multistability, oscillations, traveling waves, and spatial patterns (Kilpatrick, 2013).

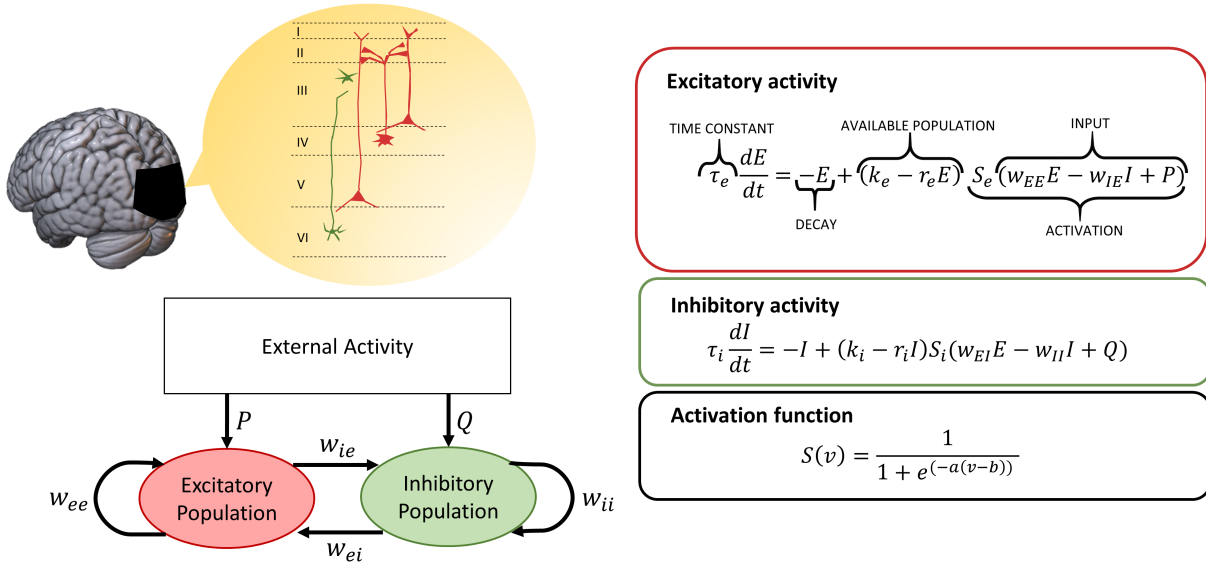

**Figure 3. Wilson-Cowan model topography and mathematical expression.** The model aims to represent a cortical column within the brain, consisting of an excitatory and an inhibitory population. These two connected populations each have a self-connection and external activity as input. Dynamics are expressed with nonlinear ordinary differential equations which are shown on the right for each neural population. Nonlinearity is introduced with the sigmoidal operator corresponding to the activation function.

A simplified version of the WC equations shown in Fig. 3 has been previously implemented by Abeysuriya et al. (2018) in a network of neural masses to generate alpha oscillations. These two populations are described as follows:

$$\tau_e \frac{dE(t)}{dt} = -E(t) + S(w_{ee}E(t) + w_{ie}I(t) + P + \epsilon(t)) \quad (1)$$

$$\tau_i \frac{dI(t)}{dt} = -I(t) + S(w_{ei}E(t) + \epsilon(t)) \quad (2)$$

where  $E$  and  $I$  represent the activity of the excitatory and inhibitory neural populations in the form of mean firing rates,  $\tau_{e/i}$  are the excitatory/inhibitory time constants,  $w_{ab}$  are the local connection strengths from population  $a$  to population  $b$ ,  $P$  is a constant external input to the excitatory neural population, and  $\epsilon$  is a noise signal added to the system. The studied NMMs share similar parameters, with some variations such as the use of membrane potential instead of firing rates as the state variable, and the concatenation of the external input and noise term into a single variable.

Concurrently to WC and Freeman, Lopes da Silva and colleagues developed a point-process model of EEG alpha rhythm generated with a corticothalamic loop (Lopes da Silva et al., 1974).

Specifically, these authors proposed a negative feedback loop between excitatory thalamocortical relay cells and inhibitory thalamic reticular neurons as the basis for generating certain brain rhythms, in a manner similar to the interacting E and I populations in the WC model. By applying linear systems analysis to investigate the influence of physiological parameters on neural periodic patterns, they established a novel approach to studying oscillatory dynamics in theoretical neuroscience that relied on analytical power spectra. The Lopes da Silva model had a substantial impact on subsequent corticothalamic models and linear analysis tools (Cona et al., 2014; Bhattacharya et al., 2011).

A few years later, Zetterberg et al. (1978) built an extension of the model by adding a second cortical excitatory population in order to separately account for pyramidal cells and excitatory interneurons. Their work was then reprised and further popularized by Jansen and Rit (1995). In the JR model, each neural population is described in two steps: a transformation of the incoming average pulse density of action potentials into an average postsynaptic membrane potential, followed by a sigmoidal function to perform the inverse conversion. Over the years, several extended versions of JR have been proposed (Wendling et al., 2000; David and Friston, 2003; Zavaglia et al., 2006; Sotero et al., 2007), - including Moran et al., where they focused on steady-state spectral responses with a linearized approximation of the model (Moran et al., 2007). Contemporaneous with these early conceptualizations and formulations of NMMs in the 1970s was the introduction of NFM by Amari, Wilson & Cowan, Nunez, and others. The ‘brain wave equation’ model of (Nunez, 1974) is particularly important here as it was the first to attempt to describe neural activity across the entire cerebral cortex with an evolution in both time and space. This work was a major influence for several macroscale NFM formulations in the 1990s (Jirsa and Haken, 1996; Wright and Liley, 1996; Robinson et al., 1997). The latter of these which was then extended in 2001 to include the thalamus, and subsequently used to investigate a wide range of brain states including sleep (Robinson et al., 2005; Abeysuriya et al., 2014), epileptic seizures (Zhao and Robinson, 2015; Breakspear et al., 2006), evoked responses (Kerr et al., 2008), functional connectivity (Robinson, 2014), and alpha rhythms (Robinson et al., 2002, 2005).

For a more detailed timeline and review on the development of NPMs and whole brain modelling in general, we refer the reader to Griffiths et al. (2022) and Chow and Karimippanah (2020). The early mathematical models reviewed there and above laid the groundwork for most NPM formulations used in theoretical neuroscience today. In particular, they form the basis for the four most widely studied models of the EEG alpha rhythm - Jansen-Rit (JR), Moran-David-Friston (MDF), Liley-Wright (LW) and Robinson-Rennie-Wright (RRW). Before presenting each of these models individually in detail, we conclude our background review in the next section by examining the two common mathematical operators of NPMs.

## 1.5 Classification of NPMs and mathematical characteristics of convolution-based models

NPMs can be further divided based on different modelling approaches, including convolution vs. conductance-based models and voltage vs. activity-based models. For conductance-based models, very high coherence between neurons is assumed, to the extent that the dynamics of neuron population resembles the dynamics of each single neuron. The mathematical equations then follow the same structure as single neuron conductance-based models (Marreiros et al., 2010; Breakspear, 2017). Since distinct types of ionic currents are explicitly modelled, a direct relationship between modelled synaptic processes and physiological mechanisms can be determined (Moran et al., 2011). In contrast, convolution-based NPMs rely on empirical observations of the collective response of a neural population to their inputs, to build a phenomenological model that captures the system's response. Although convolution-based models lack the biological detail of conductance-based models, they provide a more straightforward and interpretable framework for understanding the system-level dynamics of neural populations.

Since the four models reviewed in this paper are considered convolution-based models, each with slightly different expressions or additional elements, we will present the common mathematical foundations between all of them (which is composed of two operators) allowing for relevant comparisons. Even though a conductance-based model is not explicitly investigated here, we note that the LW model incorporates conductance-based components which enables us to determine how these factors affect the dynamics of the model.

The mathematical expression of convolution-based NPMs is composed of two key operators: a rate-to-potential operator describing the dynamics between synapses and dendritic trees, and a potential-to-rate operator representing the output firing rate produced at the soma, which were briefly introduced in the description of the WC equations (Figure 3). The rate-to-potential operator describes a conversion from firing rate to membrane potential by excitatory and inhibitory neurotransmitters, usually in the form of an impulse response. It has been shown that the convolution of the incoming spike rate with an impulse response adequately reproduces the postsynaptic potential in response to presynaptic firing (Bhattacharya, 2013). This is expressed as a second-order differential equation, which makes the representation of chemical synapses linear (Rall, 1962, 1964; Freeman, 1975; Spiegler, 2012). The nonlinearity is introduced with the potential-to-rate operator (also known as a wave-to-pulse conversion (Freeman, 1992; Cook et al., 2021)), generally in the form of a sigmoid, which transforms the average membrane potential of the population into the average rate of action potentials fired by the neurons. The sigmoid form is not derived from a biophysical model, but rather seen as a physiologically consistent choice (Coombes and Byrne, 2019). Furthermore, the introduction of nonlinearity allows for the representation of more complex behavior (such as chaos) within the brain. It is worth noting that the sigmoidal shape of the function limits the effective dynamic range (Spiegler, 2012) - the validity of which we discuss further in section 4.2. Thus the central part of all neural populations in convolution-based NPMs is described by a second-order nonlinear ordinary differential equation, which can either be deterministic or stochastic

depending on the external input (usually noise) introduced to the model. NMMs can be further categorized based on the nature of their state variable. In some models, such as WC, the state variable represents the proportion of cells that are active in the population at a given time, referred to as activity-based. On the other hand, in voltage-based models, the state variable corresponds to the membrane potential of the neurons in the population. This means that changes in the state parameters represent changes in the electrical potentials (Griffiths et al., 2022). Therefore, NMMs are classified based on the mathematical operators used and the biological representation of the output state variable.

Almost all convolution-based NPMs in the literature are built upon the presented mathematical operators, which form the fundamental basis of these models. This allows for meaningful comparisons between models, and the impact of varying model elements on the output can be assessed. It is worth noting that these models can be linearized around their stable points, yielding analytic versions of the model equations. Although many assumptions are made, stability analysis has been useful in understanding the dynamics of the systems in question and their implications for brain organization. Even though they share the same backbone, there are three key factors that distinguish the models: 1) the number of neural population modelled, 2) the degree of physiological complexity associated with each neural population, and 3) the connectivity between them.

**A) Rate-to-potential operator:** dynamics between synapses and dendritic trees

**B) Potential-to-rate operator:** produces output spike rate

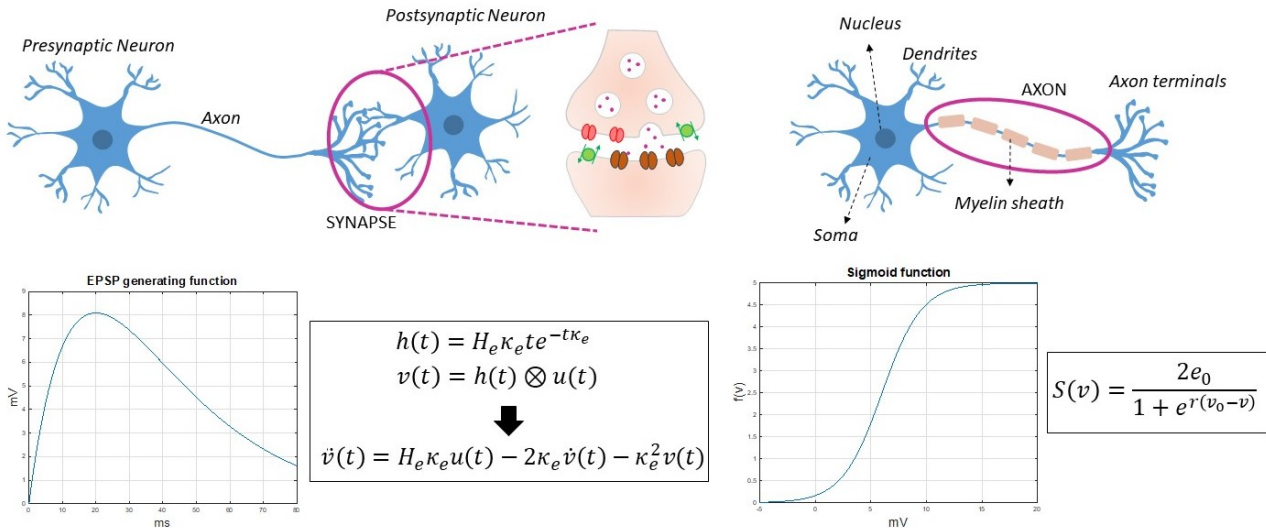

**Figure 4. Foundational components of NMM to simulate local brain activity.** Neural populations are composed of **A)** A rate-to-potential operator describing the postsynaptic potential generated by the firing rates of the presynaptic neurons; and **B)** a potential-to-rate operator, typically expressed as a nonlinear function, to relate the membrane potential of the neurons to their spiking activity. These two operators are the basic components of NMM and shape the dynamics and behavior of the system.

## 2 Methods 407

### 2.1 Alpha rhythm models 408

With the basic conceptual and mathematical background established, the four selected NPMs 409  
representing alternative theories for the genesis of alpha activity - JR, MDF, LW, and RRW 410  
- will now be introduced in full detail. In the next few sections we present for each model i) 411  
topological and circuit diagrams with the corresponding equations, ii) alpha rhythm simulations 412  
using both numerical (differential equation) and analytical (linearized algebraic) expressions<sup>1</sup>, 413  
and iii) a didactic commentary. By comparing and contrasting these models in the subsequent 414  
sections, we aim to provide insights into their activity regimes and dynamical properties. All 415  
model parameters are listed in Supplementary S.6 along with their definitions. Selected equa- 416  
tions are included in figures, while the complete equations for all models can be also be found in 417  
Supplementary S.6 for reference, and the Python code implementations in the GitHub reposi- 418  
tory accompanying this paper ([https://github.com/GriffithsLab/Bastiaens2024\\_AlphaModels](https://github.com/GriffithsLab/Bastiaens2024_AlphaModels)). 419

#### 2.1.1 Jansen-Rit model 420

Based on Lopes da Silva's lumped parameter formulation (Lopes da Silva et al., 1974), the JR 421  
model was one of the first of its kind to reproduce a broad range of EEG oscillation frequencies 422  
(including alpha), as well as evoked response waveform, by describing the macroscopic elec- 423  
trophysiological activity within a cortical column (Jansen et al., 1993; Jansen and Rit, 1995). 424  
Analogously to Zetterberg et al. (1978), JR developed the model with three interconnected 425  
neural populations: pyramidal projection neurons ( $y_0$ ), excitatory ( $y_1$ ) and inhibitory ( $y_2$ ) in- 426  
terneurons forming two feedback loops - a (fast) excitatory feedback loop and a slow inhibitory 427  
feedback loop (Fig. 5A) (Knösche, 2015). The output  $y_1 - y_2$  represents the net PSP on the 428  
pyramidal cell dendrites, which is defined as the difference between the EPSP from the exci- 429  
tatory population and the IPSP from the inhibitory population. This quantity corresponds 430  
to the membrane potential of pyramidal neurons which can also be understood as the out- 431  
put of the columnar microcircuit that is transmitted to other adjacent and distal brain areas. 432  
Since pyramidal neurons have their apical dendrites in the superficial layers of the cortex where 433  
the postsynaptic potentials are summated, their activity is the primary contribution to the 434  
measured EEG signal (Jansen and Rit, 1995; Grimbert and Faugeras, 2006a). 435

The mathematical expression of the sigmoid for JR is defined as 436

$$S(v) = \frac{2e_0}{1 + e^{r(V_0 - v)}} \quad (3)$$

with  $e_0$  representing the firing rate at threshold (and  $2e_0$  the maximum firing rate),  $r$  denoting 437

---

<sup>1</sup>With regards to nomenclature: originally we aimed to find a generalized mathematical form that covered all four models of interest, and allowed for a single nomenclature with clear correspondences across models indicated by variable and parameter names. After further exploration we determined however that this is not possible without an unhelpfully large amount of abstraction. We have therefore elected to write out the equations following exactly the original and/or primary literature sources.

the variance of firing thresholds, and  $V_0$  corresponding to the mean firing threshold. The 438  
impulse response is expressed as follows 439

$$h(t) = \alpha\beta te^{-\beta t} \quad \text{for } t > 0, \quad (4)$$

and corresponds to an alpha function. The parameter  $\alpha$  is defined as the maximum am- 440  
plitude of the postsynaptic potential, and  $\beta$  represents a sum of the reciprocal of the time 441  
constant of the passive membrane and all other spatially distributed delays present in the den- 442  
dritic network, condensed into a single lumped term. For the excitatory populations  $\alpha$ ,  $\beta$  in 443  
Eq. 4 correspond to the terms  $A$ ,  $a$  in Fig. 5 respectively, and for the inhibitory population  $\alpha$ , 444  
 $\beta$  are  $B$ ,  $b$ . 445

After transforming the above impulse response in the Laplace domain, we are able to fully 446  
define the system with second-order differential equations (derivation provided in Supplemen- 447  
tary S.1). The final set of differential equations are detailed in Fig. 5B with the numerically 448  
integrated time series output, the associated power spectrum, as well as the power spectrum 449  
obtained with the transfer function in Fig. 5C. It is important to note that the connectivity 450  
parameters  $C_1$  and  $C_3$  are slightly different than  $C_2$  and  $C_4$  based on the mathematical ex- 451  
pression. As noted by Cook et al. (2021), JR assumes that pyramidal cell population equally 452  
synapses onto the other two populations. However, the synaptic coefficients at the dendrites 453  
of the excitatory and inhibitory populations differ. The inverse is also observed with the pyra- 454  
midal cells, as the synaptic coefficient at the dendrites of the pyramidal cells is fixed (1 and -1 455  
for excitatory and inhibitory interneurons respectively), but the synaptic connectivity changes. 456  
Therefore,  $C_1$  and  $C_3$  represent these former synaptic coefficients and  $C_2$  and  $C_4$  are the latter 457  
connectivity constants, as seen in the detailed schematic. However, in practice, they all repre- 458  
sent connectivity strength and can be likened and associated with each other. Further details 459  
are provided in Supplementary S.6 in the details of the JR model equations. 460



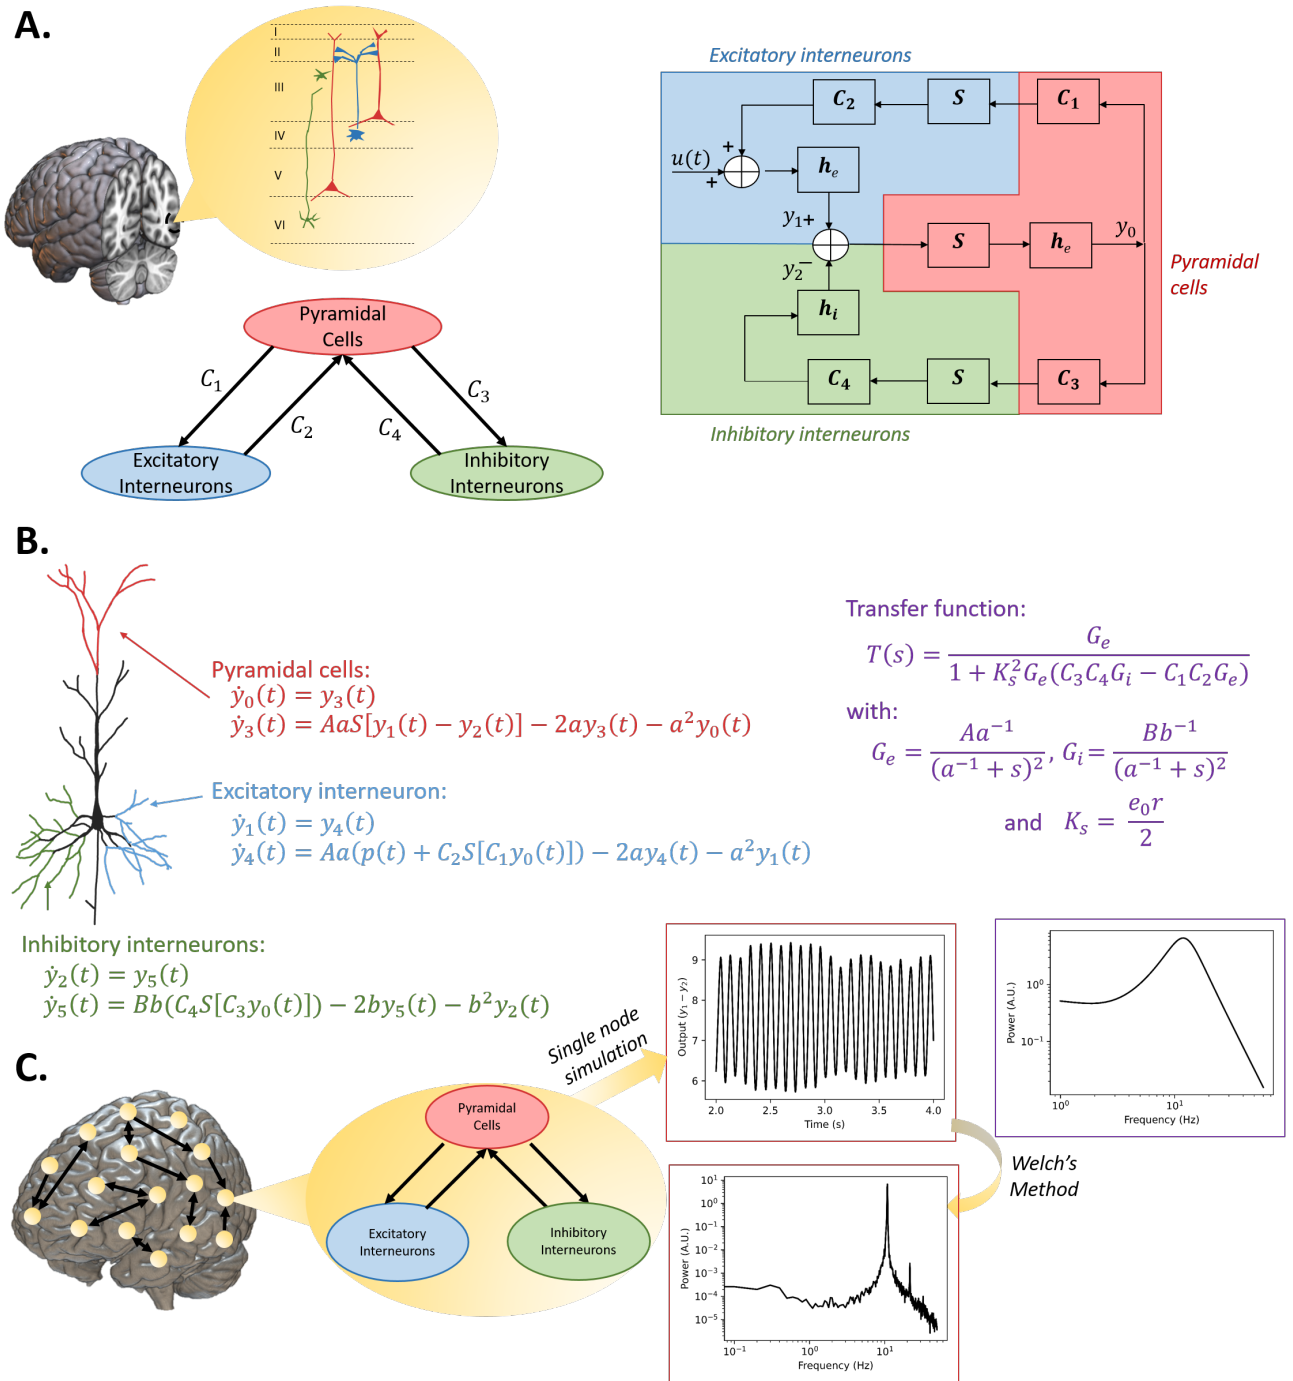

**Figure 5. JR model topography, schematic, numerical and analytical mathematical expression, and alpha simulation results.** A) General structure of the model, along with a detailed schematic that includes the operators and representations of the connectivities; B) Left: Numerical mathematical expression for each neural population; Right: Transfer function of the model derived using control graph analysis; C) Simulation outputs of the model with standard parameters (time series, power spectrum estimated from the time series and analytical power spectrum)

### 2.1.2 Moran-David-Friston model

Many models inspired by JR emerged in the years following their introduction. One of the most influential of these was proposed by David and Friston (2003), later extended by (Moran et al., 2007). The MDF model and the JR model (of which it is an indirect extension) thus share many

similar features, and are interesting to compare in terms of the new elements included in David and Friston (2003) and (Moran et al., 2007). One such element is the addition of recurrent inhibitory connections, which were introduced by (Moran et al., 2007) in order to enable the generation of a wider range of oscillatory frequencies. Another is that the contribution from excitatory and inhibitory populations are separated in the equations, giving rise to independent EPSP and IPSP terms. The quantity used in observation models such as EEG as a measured response corresponds to the difference between these two postsynaptic potentials, resulting in supplementary sets of differential equations. A third main modifications from JR in MDF is the expression of the sigmoid, given by

$$S(v) = \frac{1}{1 + e^{-\rho_1(v-\rho_2)}} - \frac{1}{1 + e^{\rho_1\rho_2}}. \quad (5)$$

This differs from the other models surveyed in this paper (cf. Eqs 3, 8, 11) in providing a greater flexibility in its gain behavior, parameterized by shape and position  $\rho_1$  and  $\rho_2$ .

The impulse response in MDF is identical to the JR model, and the parameters have the same definition (Supplementary S.6) with some small variable name changes ( $\alpha, \beta = H_e, \kappa_e$  for the excitatory populations, and  $\alpha, \beta = H_i, \kappa_i$  for the inhibitory population).

The paper by Moran et al. (2007) includes a linearized version of the MDF model that is used to investigate the steady-state responses. For consistency with our analyses of the JR model, here, we have determined an alternative expression for the transfer function (Fig. 6B) using graphical stability analysis.

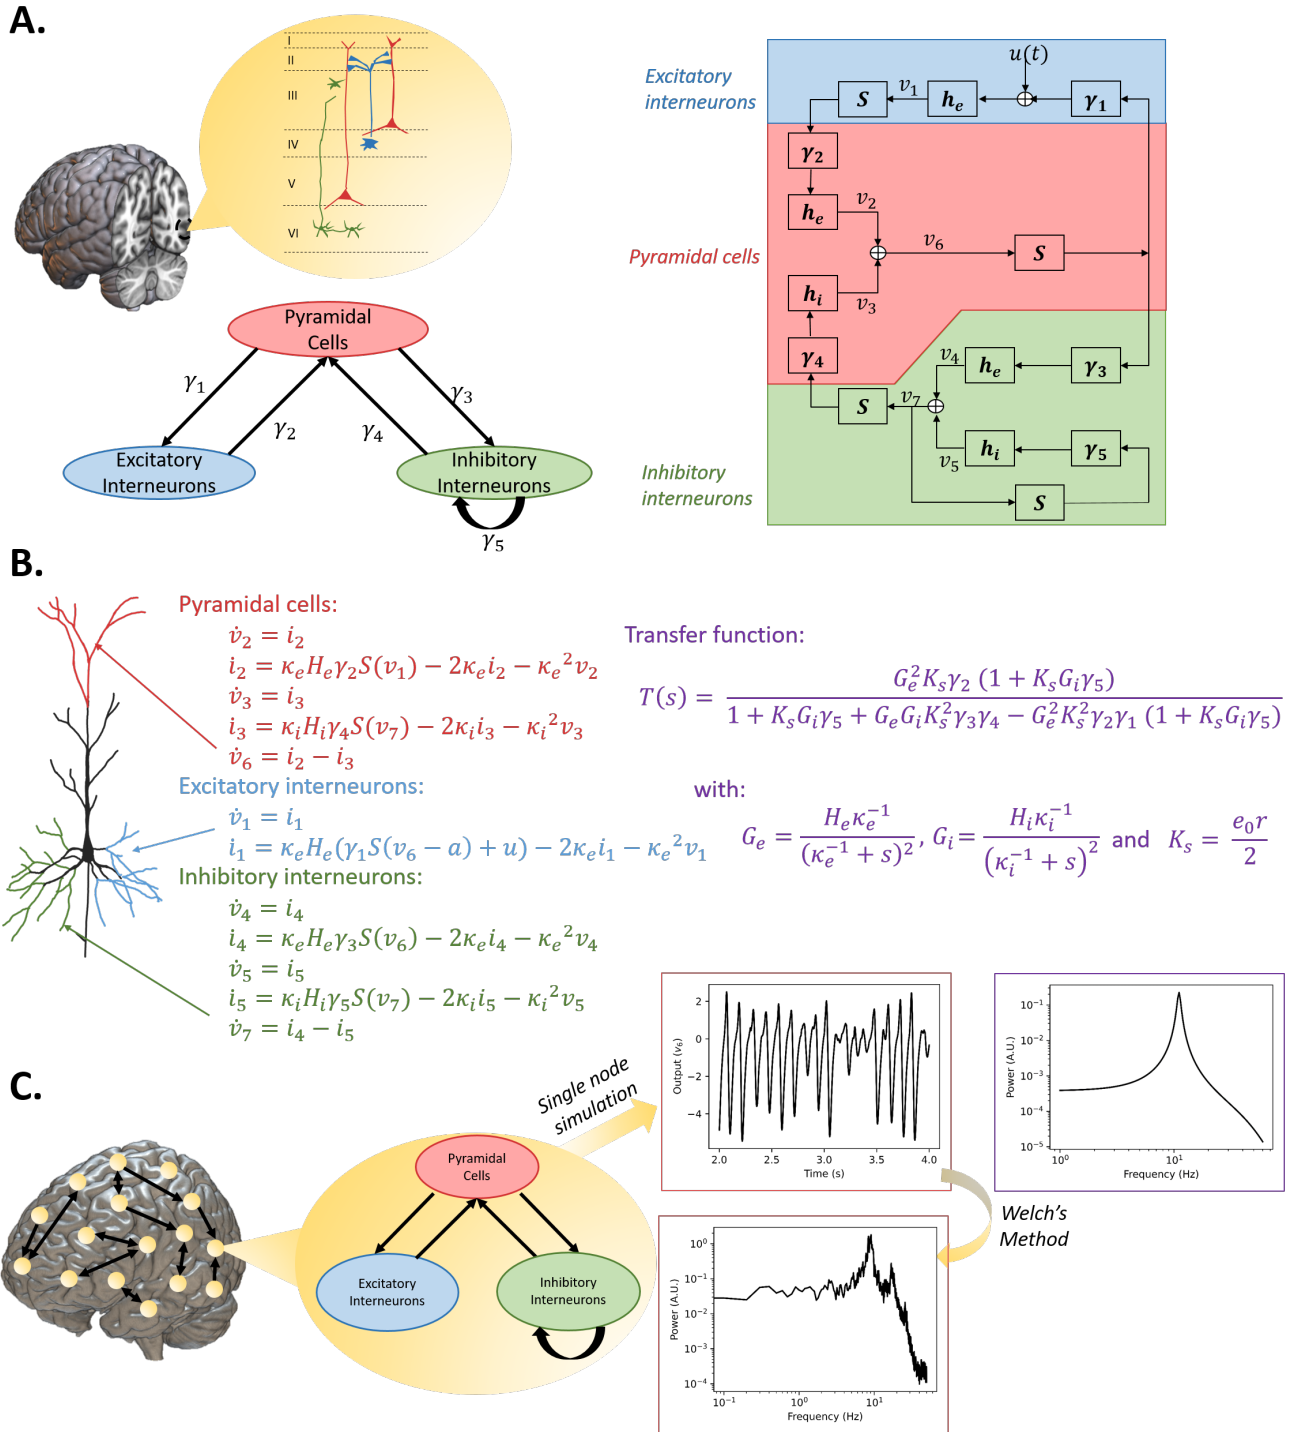

**Figure 6. MDF model topography, schematic, numerical and analytical mathematical expression and alpha simulation results** **A)** Composed of three neural populations with similar wiring structure to JR with the addition of an inhibitory self-connection; **B)** Left: Numerical mathematical expression for each neural population; Right: Transfer function of the model derived using control graph analysis; **C)** Simulation outputs of the model with modified parameters to generate alpha oscillations (time series, power spectrum estimated from the time series and analytical power spectrum)

### 2.1.3 Liley-Wright model

Liley, Wright, and colleagues (Liley et al., 2001) developed a physiologically parametrizable, two population firing-rate based model of EEG/ECoG dynamics, which differs from JR and

483

484

485

MDF in several respects. Most notably, this includes i) inclusion of high-order excitatory and inhibitory neurotransmitter kinetics, ii) presence of synaptic reversal potentials, and iii) the separation of each neural population into both a dendritic and a somatic compartment, yielding two membrane potential state variables per population instead of one. The LW model can be thought of as a convolution-based model with conductance-based synaptic dynamics (where a neuron is regarded as an electrical circuit and the membrane response follows the inflow and outflow of current through ionic channels). These additional features make it more physiologically realistic than e.g. JR, MDF, and WC, albeit at the expense of greater levels of complexity and nonlinearity (Cook et al., 2021). As with the RRW model discussed below, the LW model was initially formulated as a macroscopic neural field model, with both spatial and temporal variation in the excitatory and inhibitory neural population equations. The version presented here is simplified, however, by neglecting spatial components (setting partial derivatives in the spatial terms of the original equations), and only considering the temporal dynamics - which nevertheless preserves the essential qualitative behavior (alpha-frequency fluctuations) that is our focus in the present paper. These expressions are based on the presentations by Song et al. (2019) and Hartoyo et al. (2019), in which the LW model was used to explore periodic discharges in acute hepatic encephalopathy and eyes-open/closed alpha-blocking, respectively.

The sigmoidal firing rate function in the LW model is defined as

$$S(t) = \frac{S_{(e,i)}^{max}}{1 + e^{-(\sqrt{2}V(t) - \mu_{e,i})/\sigma_{e,i}}} \quad (6)$$

where  $S_{(e,i)}^{max}$  corresponds to the maximal attainable firing rate,  $\mu_{e,i}$  is the spike threshold, and  $\sigma_{e,i}$  is the standard deviation for spike threshold. The soma membrane potential is given by

$$\tau \dot{V}(t) = V_r - V(t) + \sum \psi(V(t))I(t) \quad (7)$$

where  $\psi(V(t)) = \frac{[V_{eq} - V(t)]}{|V_{eq} - V_r|}$ , with  $V_r$  as the mean resting membrane potential, and  $V_{eq}$  the mean equilibrium potential. Similarly to MDF and JR, the impulse response in LW is expressed with an alpha function,

$$h(t) = \Gamma \gamma t e^{1-\gamma t} \quad \text{for } t > 0 \quad (8)$$

with a postsynaptic potential peak amplitude  $\Gamma_{e,i}$  and rate constant  $\gamma_{e,i}$ .

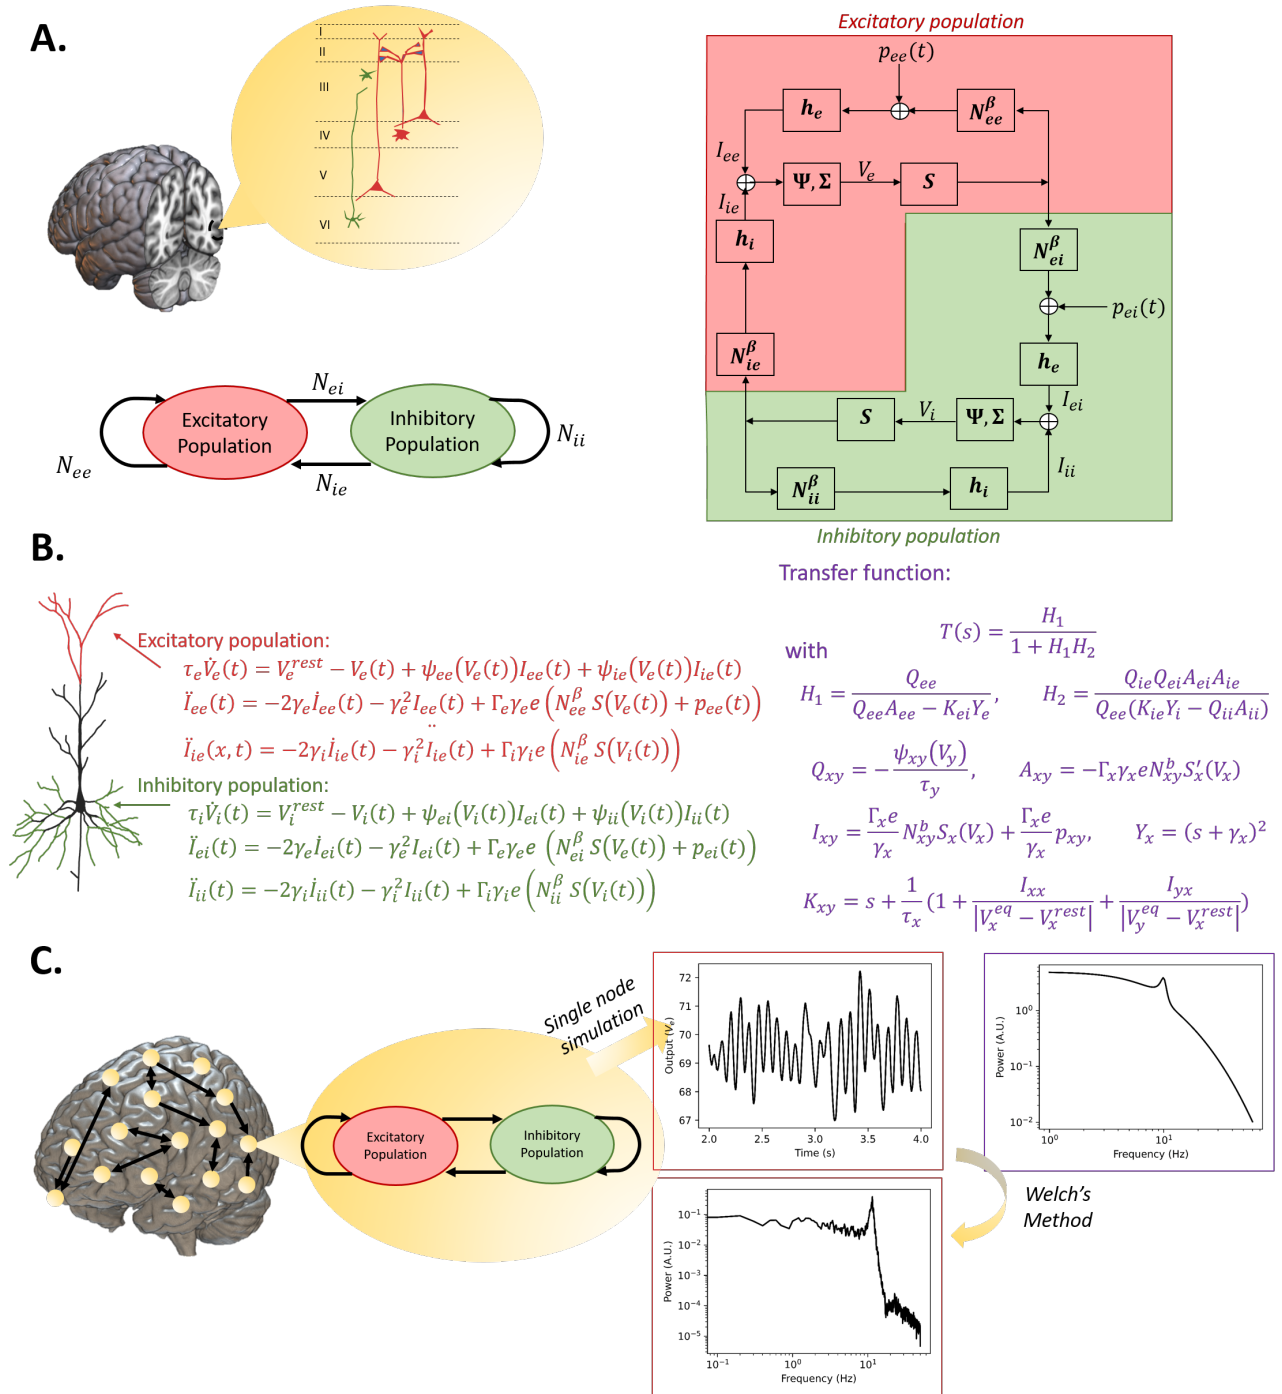

**Figure 7. LW model topography, schematic, numerical and analytical mathematical expression, and alpha simulation results.** **A)** The general structure of the model is two neural populations each with a self-connection. In the detailed schematic, compared to the other models, a third block is introduced to transform PSP into soma membrane potential. **B)** Left: Numerical mathematical expression for each neural population; Right: Transfer function of the model derived using control graph analysis; **C)** Simulation outputs of the model with standard parameters (time series, power spectrum estimated from the time series and analytical power spectrum)

### 2.1.4 Robinson-Rennie-Wright model

Unlike the three models discussed thus far, the RRW model does not attempt to offer a minimal circuit representation of a single cortical macrocolumn. Instead, this model includes thalamic

neural populations in addition to cortical ones, and thus is primarily concerned with describing cortico-thalamic interactions. RRW permits the exploration of the second class of alpha theory outlined in Fig. 2B, which hypothesize that the corticothalamic loop is central for resting state alpha. The model consists of four neural populations, two cortical (excitatory and inhibitory, similar to previous schematics) and two thalamic (thalamic reticular nucleus and thalamic relay nuclei) (Robinson et al., 2002). In this case, the two cortical populations are lumped together by assuming that intracortical connections are random, making their number proportional to the number of available synapses, and implying that cortical excitatory and inhibitory voltages are equal (Roberts and Robinson, 2012). As noted above, like LW the original formulation of RRW is as a neural field model, making use of a damped wave equation operator for including a spatial representation. However, here we again assume spatial uniformity, removing any spatial variations, as indeed is commonly done in analyses of this model. Propagation delay and long axonal ranges are still preserved solely for the cortical excitatory population, this being the only population large enough with distant connections for wave propagation to have a significant effect (Zhao et al., 2015). Furthermore, a corticothalamic loop delay parameter ( $t_0$ ) is introduced in the model to take into account the conduction delay of the signal when it passes through thalamic nuclei and the projections. The differential equations comprising the RRW model version we use here are explicitly detailed by Zhao and Robinson (2015), who also modified them to study epileptic seizures and bursting dynamics. The firing rate is defined as

$$Q_a = \frac{Q_a^{max}}{1 + e^{-\frac{V_a - \theta_a}{\sigma_a}}} \quad (9)$$

with  $Q_{max}$  representing the maximum firing rate,  $\theta_a$  the mean firing threshold, and  $\sigma'_a \pi \sqrt{3}$  the standard deviation of the threshold distribution. The damped wave equation governing long-range axonal activity propagation is expressed as

$$D_a \phi_a = Q_a \quad (10)$$

with  $\phi_a$  corresponding to the mean density of outgoing spikes produced by population  $a$  and  $D_a = \frac{1}{\gamma_a^2} \frac{\partial^2}{\partial t^2} + \frac{2}{\gamma_a} \frac{\partial}{\partial t} + 1 - r_a^2 \nabla^2$

In the spatially uniform case where  $\nabla^2 = 0$ , owing to the short range of cortical inhibitory axons and the relative smallness of the thalamus,  $\gamma_a$  is so large that the approximation  $\phi_a = Q_a$  can be made for  $a = i, r, s$ . This is called the *local interaction approximation* and is not assumed for  $\phi_e$  as the propagation effects are significant only when considering the axons of the excitatory cortical neurons, as they are the only ones with sufficient length as mentioned previously (Robinson et al., 2001, 2002; Sanz-Leon and Robinson, 2017).

The impulse response in RRW includes both synaptic rise time  $\beta^{-1}$  and synaptic decay time  $\alpha^{-1}$  parameters, and is defined as

$$w(u) = \frac{\alpha\beta}{\beta - \alpha}(e^{-\alpha u} - e^{-\beta u}) \quad \text{for } \beta \neq \alpha$$

$$w(u) = \alpha^2 u e^{-\alpha u} \quad \text{for } \alpha = \beta$$
(11)

which implies that the dendritic response is

547

$$D_{\alpha\beta} = \frac{1}{\alpha\beta} \frac{d^2}{dt^2} + \left( \frac{1}{\alpha} + \frac{1}{\beta} \right) \frac{d}{dt} + 1$$
(12)

which is identical to the JR impulse response function when  $\alpha = \beta$ . In the spatially uniform case, the impulse response appears as

548

$$D_{\alpha\beta} V_e(t) = v_{ee} \phi_e(t) + v_{ei} \phi_i(t) + v_{es} \phi_s(t - t_0/2)$$
(13)

$$D_{\alpha\beta} V_r(t) = v_{re} \phi_e(t - t_0/2) + v_{rs} \phi_s(t)$$
(14)

$$D_{\alpha\beta} V_s(t) = v_{se} \phi_e(t - t_0/2) + v_{sr} \phi_r(t) + v_{sn} \phi_n(t)$$
(15)

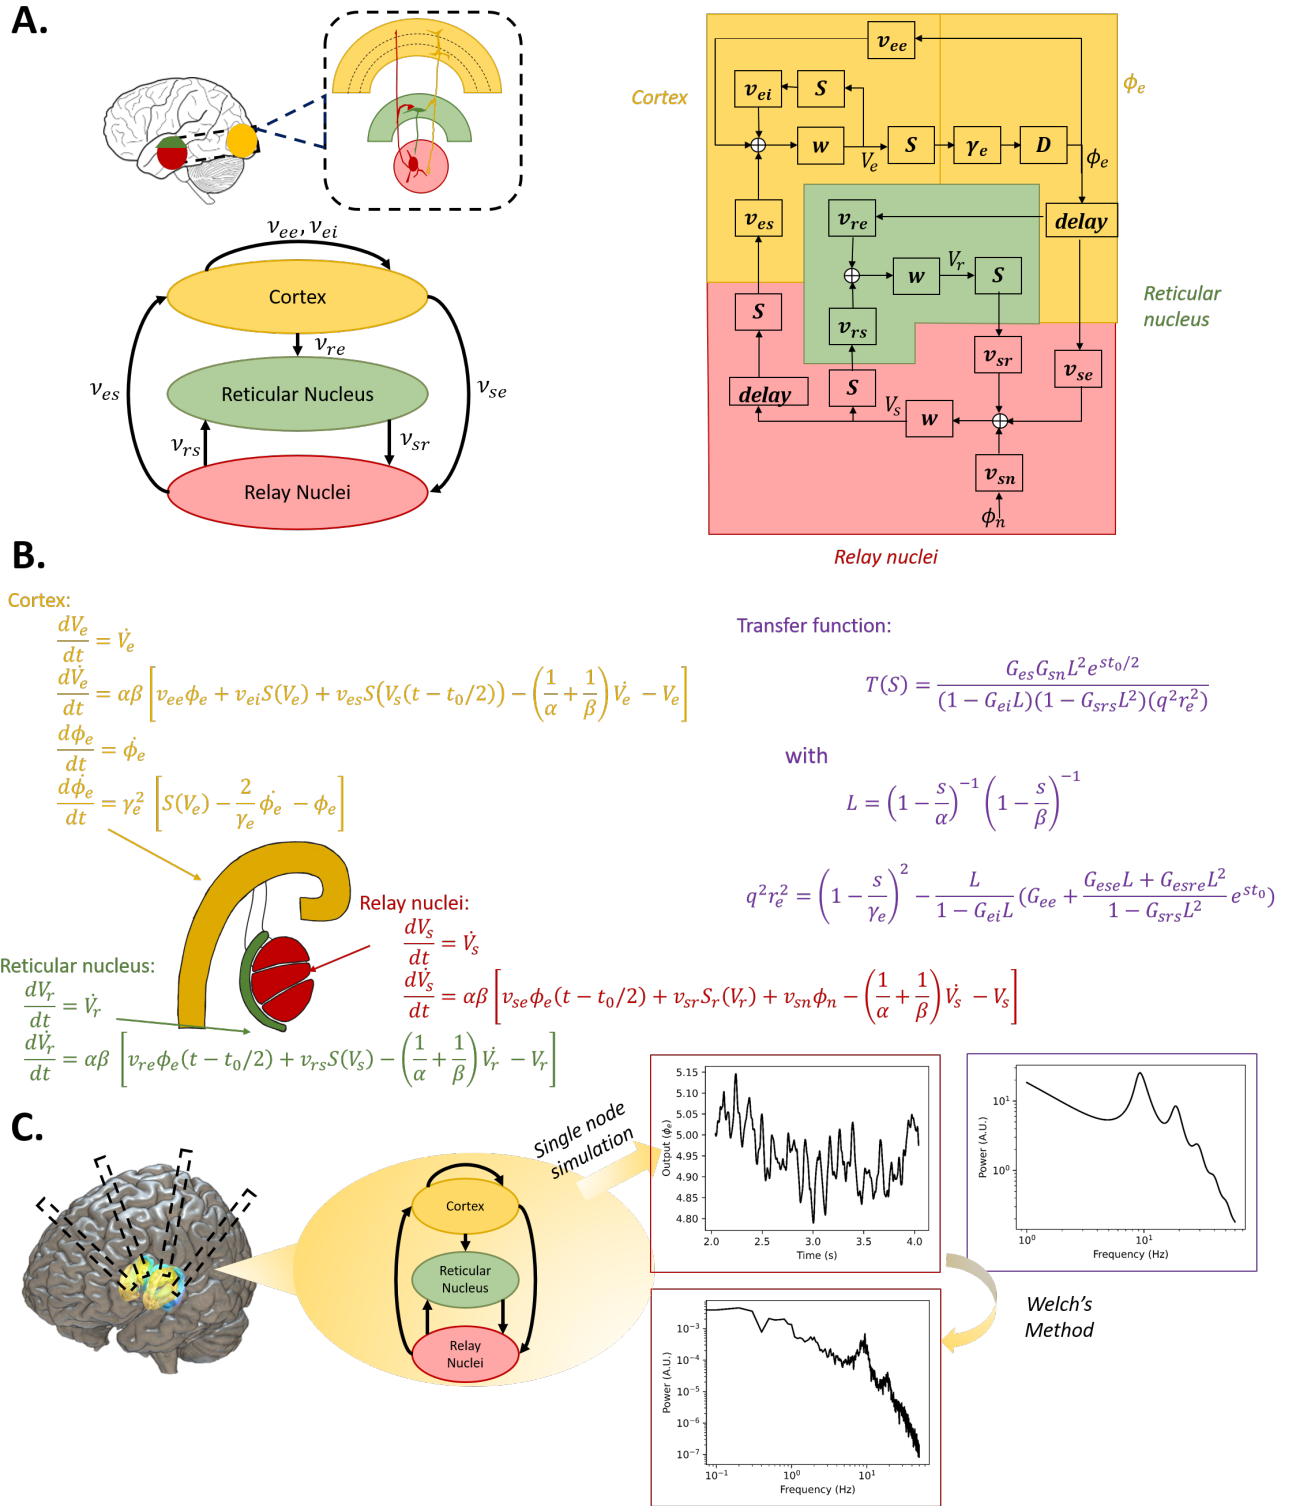

**Figure 8. RRW model topography, schematic, numerical and analytical mathematical expression, and alpha simulation results.** **A)** Three main populations are broadly described: the cortex (composed of excitatory and inhibitory neurons) and two thalamic populations (reticular nucleus and relay nuclei). Delays are included to take into account long range connections from the cortex to the thalamus; **B)** Left: Numerical mathematical expression for each neural population; Right: Transfer function of the model derived using control graph analysis; **C)** Simulation outputs of the model with standard parameters (time series, power spectrum estimated from the time series and analytical power spectrum)



## 2.2 Simulation, power spectrum, and stability analysis methods

For all four of the selected models, we simulate alpha activity numerically (by integrating the models' differential equations given in Figs. 5-8 and Supplementary S.6) and analytically, by algebraically calculating the power spectrum from the models' transfer function. Python is utilized as the programming language for implementing all numerical and analytical equations, as well as statistical analyses and visualization. To ensure consistency, simulations are executed for a duration of 100 seconds, generating a time series that represents neural activity within the principal excitatory cortical population. The power spectrum of this simulated activity is then computed using Welch's method, as implemented in the `scipy` library (Virtanen et al., 2020).

The ability and accuracy of the models to replicate an empirical alpha rhythm is explored by running numerical simulations with parameter values that are commonly used in previous studies to elicit alpha activity, which we refer to as 'standard alpha parameters'. The resulting power spectra are compared against characteristic empirical resting state EEG features. These nominal parameter values are taken from Jansen and Rit (1995) for JR, Moran et al. (2007) for MDF (using David and Friston (2003) to tune to a dominant frequency of alpha [8-12Hz] instead of beta [12-20Hz]), Liley et al. (2001) for LW, and Zhao and Robinson (2015) for RRW, which stem from Robinson et al. (2002); Rowe et al. (2004). Defining precise reference features of empirical alpha rhythms presents a challenge, due to the observed heterogeneity in resting state alpha oscillations both within individuals and between individuals across different moments (Niedermeyer et al., 2005). However, certain prominent elements of the resting state power spectral density are well-established. On average, a healthy adult human exhibits a main oscillation frequency near 10Hz, accompanied by the presence of harmonics (Van Albada et al., 2010). These features are considered somewhat volatile, as they significantly vary between individuals and across different sessions. More stable or broader resting state EEG features include: the frequency scaling of  $1/f^\beta$  ( $\beta \approx 1 - 2$ ) (Muthukumaraswamy and Liley, 2018), and the phenomenon of *alpha blocking* - attenuation of the alpha frequency peak during the transition from eyes-closed (EC) to eyes-open (EO) state. Each model's estimation of these features is compared against reference values derived from empirical data for evaluation, more specifically from Muthukumaraswamy and Liley (2018) where they used Irregularly Resampled Auto Spectral Analysis to quantify the  $1/f$  components of MEG/EEG/ECOG data. The high and low frequency  $\beta$  values were obtained from 5min 64 channel EEG eyes-closed recordings of seventeen healthy male participants (mean age = 23), and results were confirmed with other datasets (Muthukumaraswamy and Liley, 2018).

The  $\beta$  frequency scaling can be quantified in several ways. One approach involves considering the entire spectrum, which empirically tends to fall within the range of 1 to 2. Another approach involves evaluating two distinct values of  $\beta$ , one for lower frequencies (pre-peak) and another for higher frequency values (post-peak). In our simulated results, we estimated  $\beta$  with two different methods: 1) Evaluating pre- and post-peak  $\beta$  separately by fitting a line with linear regression in the logarithmic scale, and 2) Using the power spectrum fit of the FOOF library (<https://foof-tools.github.io/foof/>; Donoghue et al., 2020), which parametrizes neural power spectra into a

mixture of the  $1/f^\beta$  background and a Gaussian for each frequency peak. These FOOOF fits are also used to calculate the dominant oscillation frequencies of the power spectra, which are discussed in detail in parameter space figures of Section 3.1.2. We compare the  $\beta$  values approximated for each of our models against those estimated from EO and EC resting state EEG data reported in Muthukumaraswamy and Liley (2018). All signal processing analysis and modelling results are fully available at [https://github.com/GriffithsLab/Bastiaens2024\\_AlphaModels](https://github.com/GriffithsLab/Bastiaens2024_AlphaModels) and implemented in Python 3.8.

To gain further insights into the dynamics generated by JR and LW, we determined the stability of the fixed points of the system as a function of E-I connection strengths. For JR, similar to Grimbert and Faugeras (2006b), the fixed points are determined by setting the derivatives to 0. With some manipulations, the equilibrium points in the  $(C, y_1 - y_2)$  plane with  $y = y_1 - y_2$  are equal to:

$$y = \frac{A}{a}p + \frac{A}{a}C_2S\left(\frac{A}{a}C_1S(y)\right) - \frac{B}{b}C_4S\left(\frac{A}{a}C_3S(y)\right) \quad (16)$$

The stability of the fixed points is then defined using the Jacobian matrix

$$\mathbf{Y}_{i,j} = \begin{bmatrix} \frac{\partial y_0}{\partial y_0} & \frac{\partial y_0}{\partial y_1} & \frac{\partial y_0}{\partial y_2} & \frac{\partial y_0}{\partial y_3} & \frac{\partial y_0}{\partial y_4} & \frac{\partial y_0}{\partial y_5} \\ \frac{\partial y_1}{\partial y_0} & \frac{\partial y_1}{\partial y_1} & \frac{\partial y_1}{\partial y_2} & \frac{\partial y_1}{\partial y_3} & \frac{\partial y_1}{\partial y_4} & \frac{\partial y_1}{\partial y_5} \\ \frac{\partial y_2}{\partial y_0} & \frac{\partial y_2}{\partial y_1} & \frac{\partial y_2}{\partial y_2} & \frac{\partial y_2}{\partial y_3} & \frac{\partial y_2}{\partial y_4} & \frac{\partial y_2}{\partial y_5} \\ \frac{\partial y_3}{\partial y_0} & \frac{\partial y_3}{\partial y_1} & \frac{\partial y_3}{\partial y_2} & \frac{\partial y_3}{\partial y_3} & \frac{\partial y_3}{\partial y_4} & \frac{\partial y_3}{\partial y_5} \\ \frac{\partial y_4}{\partial y_0} & \frac{\partial y_4}{\partial y_1} & \frac{\partial y_4}{\partial y_2} & \frac{\partial y_4}{\partial y_3} & \frac{\partial y_4}{\partial y_4} & \frac{\partial y_4}{\partial y_5} \\ \frac{\partial y_5}{\partial y_0} & \frac{\partial y_5}{\partial y_1} & \frac{\partial y_5}{\partial y_2} & \frac{\partial y_5}{\partial y_3} & \frac{\partial y_5}{\partial y_4} & \frac{\partial y_5}{\partial y_5} \end{bmatrix} = \begin{bmatrix} 0 & 0 & 0 & 0 & 0 & 1 & 0 & 0 \\ 0 & 0 & 0 & 0 & 0 & 0 & 1 & 0 \\ 0 & 0 & 0 & 0 & 0 & 0 & 0 & 1 \\ -a^2 & AaS'(y) & -AaS'(y) & -2a & 0 & 0 & 0 & 0 \\ AaC_2C_1S'(C_1y_0(y)) & -a^2 & 0 & 0 & -2a & 0 & 0 & 0 \\ BbC_4C_3S'(C_3y_0(y)) & 0 & -b^2 & 0 & 0 & 0 & -2b & 0 \end{bmatrix}$$

with  $y$  corresponding to the fixed point of interest and  $y_0(y) = \frac{A}{a}S(y)$ . Stability is then defined by calculating the eigenvalues of the matrix  $\mathbf{Y}$  for each fixed point, and looking at the sign of the real part of the eigenvalues. The system is stable if all the eigenvalues have a negative real part. If at least one of the eigenvalues has a positive real part, it is considered as an unstable fixed point.

Using a similar method (estimation of the fixed point, following an assessment of the stability of the fixed points by looking at the real part of the eigenvalues of the Jacobian matrix), the LW equilibrium points' stability was also determined. The full calculation and equations are detailed in the appendix of Hartoyo et al. (2019) and also in Supplementary S.6. Briefly:

The equilibrium point equations can be reduced to:

$$0 = -V_e + V_{er} + \psi_{ee}(V_e)I_{ee} + \psi_{ie}(V_e)I_{ie} \quad (17)$$

$$0 = -V_i + V_{ir} + \psi_{ei}(V_i)I_{ei} + \psi_{ii}(V_i)I_{ii} \quad (18)$$

with

613

$$I_{ee} = \frac{\Gamma_e e}{\gamma_e} N_{ee}^\beta S(V_e) + \frac{\Gamma_e e}{\gamma_e} p_{ee} \quad (19)$$

$$I_{ei} = \frac{\Gamma_e e}{\gamma_e} N_{ei}^\beta S(V_e) + \frac{\Gamma_e e}{\gamma_e} p_{ei} \quad (20)$$

$$I_{ie} = \frac{\Gamma_i e}{\gamma_i} N_{ie}^\beta S(V_i) + \frac{\Gamma_i e}{\gamma_i} \quad (21)$$

$$I_{ii} = \frac{\Gamma_i e}{\gamma_i} N_{ii}^\beta S(V_i) + \frac{\Gamma_i e}{\gamma_i} \quad (22)$$

The fixed points for  $V_e$  and  $V_i$  are then estimated by finding the values for which values these two equations intersect.

614

615

The Jacobian matrix is:

616

$$\mathbf{F}_{i,j} = \begin{bmatrix} \frac{\partial V_e}{\partial V_e} & \frac{\partial V_e}{\partial V_i} & \frac{\partial V_e}{\partial I_{ee}} & \frac{\partial V_e}{\partial I_{ei}} & \frac{\partial V_e}{\partial I_{ie}} & \frac{\partial V_e}{\partial I_{ii}} & \frac{\partial V_e}{\partial U_{ee}} & \frac{\partial V_e}{\partial U_{ei}} & \frac{\partial V_e}{\partial U_{ie}} & \frac{\partial V_e}{\partial U_{ii}} \\ \frac{\partial V_i}{\partial V_e} & \frac{\partial V_i}{\partial V_i} & \frac{\partial V_i}{\partial I_{ee}} & \frac{\partial V_i}{\partial I_{ei}} & \frac{\partial V_i}{\partial I_{ie}} & \frac{\partial V_i}{\partial I_{ii}} & \frac{\partial V_i}{\partial U_{ee}} & \frac{\partial V_i}{\partial U_{ei}} & \frac{\partial V_i}{\partial U_{ie}} & \frac{\partial V_i}{\partial U_{ii}} \\ \frac{\partial I_{ee}}{\partial V_e} & \frac{\partial I_{ee}}{\partial V_i} & \frac{\partial I_{ee}}{\partial I_{ee}} & \frac{\partial I_{ee}}{\partial I_{ei}} & \frac{\partial I_{ee}}{\partial I_{ie}} & \frac{\partial I_{ee}}{\partial I_{ii}} & \frac{\partial I_{ee}}{\partial U_{ee}} & \frac{\partial I_{ee}}{\partial U_{ei}} & \frac{\partial I_{ee}}{\partial U_{ie}} & \frac{\partial I_{ee}}{\partial U_{ii}} \\ \frac{\partial I_{ei}}{\partial V_e} & \frac{\partial I_{ei}}{\partial V_i} & \frac{\partial I_{ei}}{\partial I_{ee}} & \frac{\partial I_{ei}}{\partial I_{ei}} & \frac{\partial I_{ei}}{\partial I_{ie}} & \frac{\partial I_{ei}}{\partial I_{ii}} & \frac{\partial I_{ei}}{\partial U_{ee}} & \frac{\partial I_{ei}}{\partial U_{ei}} & \frac{\partial I_{ei}}{\partial U_{ie}} & \frac{\partial I_{ei}}{\partial U_{ii}} \\ \frac{\partial I_{ie}}{\partial V_e} & \frac{\partial I_{ie}}{\partial V_i} & \frac{\partial I_{ie}}{\partial I_{ee}} & \frac{\partial I_{ie}}{\partial I_{ei}} & \frac{\partial I_{ie}}{\partial I_{ie}} & \frac{\partial I_{ie}}{\partial I_{ii}} & \frac{\partial I_{ie}}{\partial U_{ee}} & \frac{\partial I_{ie}}{\partial U_{ei}} & \frac{\partial I_{ie}}{\partial U_{ie}} & \frac{\partial I_{ie}}{\partial U_{ii}} \\ \frac{\partial I_{ii}}{\partial V_e} & \frac{\partial I_{ii}}{\partial V_i} & \frac{\partial I_{ii}}{\partial I_{ee}} & \frac{\partial I_{ii}}{\partial I_{ei}} & \frac{\partial I_{ii}}{\partial I_{ie}} & \frac{\partial I_{ii}}{\partial I_{ii}} & \frac{\partial I_{ii}}{\partial U_{ee}} & \frac{\partial I_{ii}}{\partial U_{ei}} & \frac{\partial I_{ii}}{\partial U_{ie}} & \frac{\partial I_{ii}}{\partial U_{ii}} \\ \frac{\partial U_{ee}}{\partial V_e} & \frac{\partial U_{ee}}{\partial V_i} & \frac{\partial U_{ee}}{\partial I_{ee}} & \frac{\partial U_{ee}}{\partial I_{ei}} & \frac{\partial U_{ee}}{\partial I_{ie}} & \frac{\partial U_{ee}}{\partial I_{ii}} & \frac{\partial U_{ee}}{\partial U_{ee}} & \frac{\partial U_{ee}}{\partial U_{ei}} & \frac{\partial U_{ee}}{\partial U_{ie}} & \frac{\partial U_{ee}}{\partial U_{ii}} \\ \frac{\partial U_{ei}}{\partial V_e} & \frac{\partial U_{ei}}{\partial V_i} & \frac{\partial U_{ei}}{\partial I_{ee}} & \frac{\partial U_{ei}}{\partial I_{ei}} & \frac{\partial U_{ei}}{\partial I_{ie}} & \frac{\partial U_{ei}}{\partial I_{ii}} & \frac{\partial U_{ei}}{\partial U_{ee}} & \frac{\partial U_{ei}}{\partial U_{ei}} & \frac{\partial U_{ei}}{\partial U_{ie}} & \frac{\partial U_{ei}}{\partial U_{ii}} \\ \frac{\partial U_{ie}}{\partial V_e} & \frac{\partial U_{ie}}{\partial V_i} & \frac{\partial U_{ie}}{\partial I_{ee}} & \frac{\partial U_{ie}}{\partial I_{ei}} & \frac{\partial U_{ie}}{\partial I_{ie}} & \frac{\partial U_{ie}}{\partial I_{ii}} & \frac{\partial U_{ie}}{\partial U_{ee}} & \frac{\partial U_{ie}}{\partial U_{ei}} & \frac{\partial U_{ie}}{\partial U_{ie}} & \frac{\partial U_{ie}}{\partial U_{ii}} \\ \frac{\partial U_{ii}}{\partial V_e} & \frac{\partial U_{ii}}{\partial V_i} & \frac{\partial U_{ii}}{\partial I_{ee}} & \frac{\partial U_{ii}}{\partial I_{ei}} & \frac{\partial U_{ii}}{\partial I_{ie}} & \frac{\partial U_{ii}}{\partial I_{ii}} & \frac{\partial U_{ii}}{\partial U_{ee}} & \frac{\partial U_{ii}}{\partial U_{ei}} & \frac{\partial U_{ii}}{\partial U_{ie}} & \frac{\partial U_{ii}}{\partial U_{ii}} \end{bmatrix}$$

which evaluates to

617

$$\mathbf{F}_{i,j} = \begin{bmatrix} G(V_e) & 0 & \frac{\psi_{ee}(V_e)}{\tau_e} & 0 & \frac{\psi_{ie}(V_e)}{\tau_e} & 0 & 0 & 0 & 0 & 0 & 0 \\ G(V_i) & 0 & \frac{\psi_{ei}(V_i)}{\tau_i} & 0 & \frac{\psi_{ii}(V_i)}{\tau_i} & 0 & 0 & 0 & 0 & 0 & 0 \\ 0 & 0 & 0 & 0 & 0 & 0 & 0 & 1 & 0 & 0 & 0 \\ 0 & 0 & 0 & 0 & 0 & 0 & 0 & 0 & 1 & 0 & 0 \\ 0 & 0 & 0 & 0 & 0 & 0 & 0 & 0 & 0 & 1 & 0 \\ 0 & 0 & 0 & 0 & 0 & 0 & 0 & 0 & 0 & 0 & 1 \\ \Gamma_e \gamma_e e N_{ee}^\beta S'(V_e) & 0 & -\gamma_e^2 & 0 & 0 & 0 & -2\gamma_e & 0 & 0 & 0 & 0 \\ \Gamma_e \gamma_e e N_{ei}^\beta S'(V_e) & 0 & 0 & -\gamma_e^2 & 0 & 0 & 0 & -2\gamma_e & 0 & 0 & 0 \\ 0 & \Gamma_i \gamma_i e N_{ie}^\beta S'(V_i) & 0 & 0 & -\gamma_i^2 & 0 & 0 & 0 & -2\gamma_i & 0 & 0 \\ 0 & \Gamma_i \gamma_i e N_{ii}^\beta S'(V_i) & 0 & 0 & 0 & -\gamma_i^2 & 0 & 0 & 0 & 0 & -2\gamma_i \end{bmatrix}$$

with

618

$$G(V_e) = \frac{1}{\tau_e} \left( -1 - \frac{I_{ee}}{|V_e^e q - V_{er}|} - \frac{I_{ie}}{|V_i^e q - V_{ir}|} \right) \quad (23)$$

$$G(V_i) = \frac{1}{\tau_i} \left( -1 - \frac{I_{ei}}{|V_e^e q - V_{ir}|} - \frac{I_{ii}}{|V_i^e q - V_{ir}|} \right) \quad (24)$$

We then replace  $V_e$  and  $V_i$  with the equilibrium points computed previously, and the real parts of the eigenvalues of this Jacobian matrix are then examined to assess their stability. 619  
620

In summary: we have given a description of each of the selected neural population models of alpha activity (JR, MDF, LW, RRW), highlighting those aspects of the biological and mathematical formulation that are of particular note, and/or that vary in readily describable ways between two or more of the four. Figs. 5-8 show in a colour-coded fashion key parts of the numerical and analytical mathematical expression for each model (full details given Supplementary S.6), with the corresponding simulated time series and power spectra output shown for standard alpha oscillation parameter conditions. The aim of our numerical explorations of these models in the following was to determine 1) to what extent do these models accurately capture empirical EEG alpha rhythms, 2) how do rate constant and connectivity parameters influence the alpha regime and the dynamics of the model, and 3) what do the differences between the models imply for EEG alpha rhythmogenesis, and what are their limitations. 621  
622  
623  
624  
625  
626  
627  
628  
629  
630  
631

## 3 Results 632

Having presented and contrasted the four candidate alpha models (JR, MDF, LW, RRW) in terms of their motivation and formulation, we now turn to an assessment of their simulated activity dynamics. First, we present numerical and analytic spectra, discussing general characteristics and comparing them quantitatively against empirical EEG features from (Muthukumaraswamy and Liley, 2018). Second, an exploration of the boundaries of the alpha regime is conducted through parameter searches, with a specific focus on discerning the impact of rate constant and connectivity on the dominant oscillation frequency. Last, a comprehensive comparison of the models is provided, encompassing various facets including their topology, mathematical equations, and the biological significance attributed to the parameters. 633  
634  
635  
636  
637  
638  
639  
640  
641

### 3.1 Analysis of neural model dynamics 642

#### 3.1.1 Characteristics of model-generated alpha activity 643

##### Frequency peak and harmonics 644

Each of the models displays a dominant oscillatory frequency within the alpha range for the originally-reported default parameters, with values of 10.8Hz, 8.8Hz, 11.6Hz, and 9.5Hz observed for JR, MDF, LW, and RRW, respectively (Fig. 9A). With these parameter settings, JR closely approximates the 10Hz frequency, while LW demonstrates a slightly higher value, and RRW a lower value. Importantly, all of these frequencies fall well within the alpha oscillatory 645  
646  
647  
648  
649

range of 8-12Hz, indicating that the models adequately simulate the alpha frequency peak. It should also be noted that there is considerable heterogeneity across subjects in terms of both the central frequency and magnitude of the alpha rhythm (Haegens et al., 2014), and slight modifications in the model parameters have the potential to shift the peak frequency up or down, providing flexibility in matching specific experimental recordings. Differences between individuals in model parameters can be potentially also related to their cognitive profile as, alpha peak is considered as a biomarker for healthy cognitive functioning.

In addition to the main frequency, harmonics in the beta range are also present in each model, albeit with varying degrees of accentuation. Of these, LW exhibits the least pronounced harmonics, suggesting a closer approximation to a pure sinusoidal waveform. In contrast, RRW shows more prominent harmonics, which is evidenced in particular by the fact that (unlike the other three models) these still appear in its linearized approximation. This variable presence of harmonics across the four models, and their subtle dependence on parameter values and nonlinearities, underscores the complex nature of alpha oscillations in the brain and their spectral characteristics.

### 1/f scaling

Empirical studies have shown that aperiodic activity (also known as 1/f noise) observed in EEG power spectra following a power-law function could play a functional role in healthy brains and explain disease symptoms. For example, cognitive decline in ageing has been associated with increased 1/f noise (slope) in the power spectrum (Voytek et al., 2015), as well as aperiodic variations in stroke patients (Johnston et al., 2023). The 1/f noise is therefore an important feature of resting state EEG. Visually, the shape of the 1/f curve from the RRW model closely resembles the empirical 1/f curve (see e.g. Freeman et al. (2003); Dehghani et al. (2010)). In contrast, this feature is poorly represented by JR, which may be due to the fact that the system generate almost a perfect sinusoid, whereas RRW for instance seems to have more aperiodic fluctuations in the EEG time series.

Table 1 presents the computed data feature values across all four models. Comparison with the mean empirical EEG result (0.76) shows that 1/f pre-peak values are considerably lower for JR and LW (0.36 and 0.48 respectively), but much higher for RRW (1.64). Empirically, lower frequencies (pre-peak) exhibit steeper slopes in frontal areas, but these quantities for the JR and LW models are notably low. At higher frequencies (1/f post-peak), JR has the steepest slope (4.03), followed by RRW (3.78) then LW (2.46). All three models yield post-peak values above the empirical mean (1.21). Inversely to lower frequencies, empirically these higher frequencies in the 1/f post-peak range tend to have steeper slopes in posterior areas. However, the simulated post-peak values observed are significantly higher than the empirical values provided in Muthukumaraswamy and Liley (2018).

To summarize, the models demonstrate an underrepresentation of lower frequencies in JR and LW, and an overrepresentation in RRW. They all exhibit considerably steeper slopes for higher frequencies than the empirical average, due to their representing only the posterior area

of the brain, instead of an average value across the cortex. Visually, RRW appears to be the most similar to empirical resting state EEG, especially for the representation of  $1/f$  in lower frequencies, which is not accounted for in the other models. Finally, consistent with empirical findings, all models have lower pre-peak  $1/f$  values than post-peak  $1/f$  values during EC, with higher frequencies displaying steeper slopes in posterior areas within the cortex.

### Eyes open vs. Eyes closed

A defining characteristic of the resting state alpha rhythm in visual areas is that its amplitude is attenuated in EC compared to EO conditions, a phenomenon known as *alpha blocking* (Barry and De Blasio, 2017; Adrian and Matthews, 1934; Chapman et al., 1962). We examined the ability of our surveyed models to reproduce this effect by modifying relevant parameters based on previous research findings. In the LW model, increasing the external input to the inhibitory cortical population resulted in a reduction of alpha activity, consistent with the intuitive idea that an increase in the amount of incoming visual information is what characterizes the transition from EC to EO (Hartoyo et al., 2020). Similar effects were also observed in the JR and MDF models, where an increase in external input led to the alpha blocking. In these cases however, input is (and can only be) delivered to the excitatory rather than the inhibitory neural population. For RRW, we selected a specific parameter set that simulates the EO state based on detailed studies conducted by (Rowe et al., 2004). According to these authors, the transition from the EC to EO state is associated with a decrease in cortico-thalamocortical and intrathalamic gains, accompanied by increased cortical gains and dendritic rate parameters, which together lead to an alpha blocking behavior in the RRW model. Interestingly, these observations regarding RRW are broadly consistent with the behavior of the three intracortical models: In JR, MDF, and LW, the attenuation of the alpha rhythm is caused by an increase in input representing incoming visual stimuli. In the case of RRW, it is mediated not by a direct input per se, but by a decrease in corticothalamic interactions and an increase in cortical gains. This increase in cortical activity causing alpha blocking in RRW could be considered analogous to the increase in cortical activity caused by greater driving input in JR, MDF, and LW.

In summary, all four models capture key features of empirically observed alpha rhythms, in terms of frequency peaks, harmonics, alpha blocking, and  $1/f$  scaling. Of the four, RRW is in general notably closer to empirical EEG data in both its  $1/f$  behavior and its harmonics. It is important to acknowledge however that this analysis is based on a specific set of parameters, which can be restrictive given the wide range of parameter combinations that can give rise to the alpha regime. Therefore, further exploration of the parameter space boundaries is crucial to gain a more comprehensive understanding of the emerging behavior and dynamics of the alpha rhythm.

## A. Empirical and simulated alpha rhythm

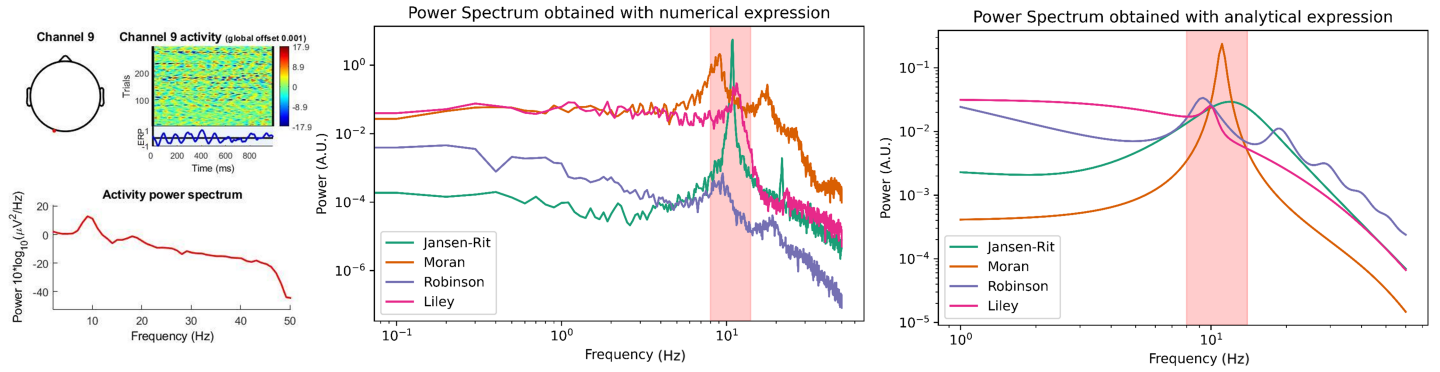

## B. Eyes-closed and Eyes-open

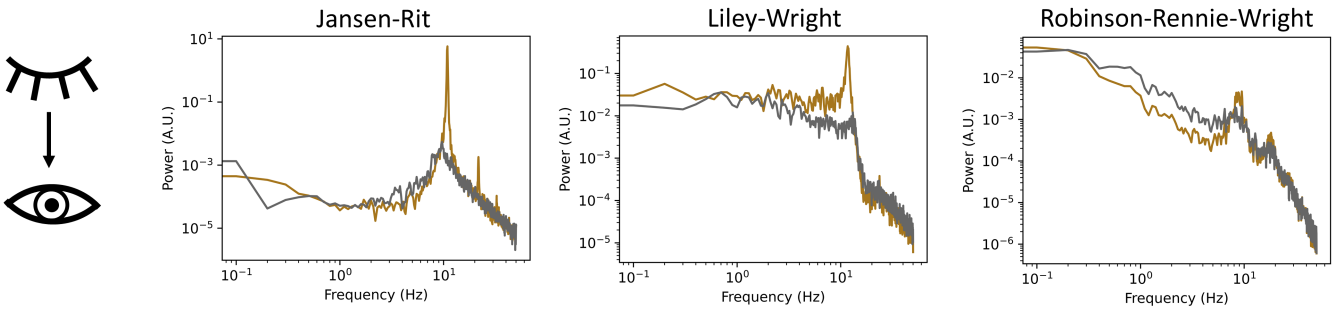

**Figure 9. Simulation results with standard parameter settings to generate characteristic resting state alpha oscillations features** **A)** Power spectra with characteristic occipital alpha rhythm from empirical EEG time series (left), from numerical simulation results (middle), and from analytical simulations (right). The red zone in the simulated results corresponds to the alpha range. All models generate an alpha oscillation with variations in specific features (peak frequency, presence of harmonics,  $1/f$  shape). **B)** Simulation results for EC and EO in JR, LW and RRW. The difference from EC to EO is an attenuation in the amplitude of the alpha rhythm.

| Model     | Main fr.     | $1/f$ pre-peak | $1/f$ post-peak | Harmonics |
|-----------|--------------|----------------|-----------------|-----------|
| JR        | 10.8         | 0.39           | 4.04            | Y         |
| MDF       | 8.8          | 0.10           | 5.50            | Y         |
| LW        | 11.6         | 0.48           | 2.46            | Y         |
| RRW       | 9.5          | 1.64           | 3.78            | Y         |
| Empirical | $\approx 10$ | 0.76           | 1.21            | Y         |

**Table 1. Evaluating Model Performance against Empirical EEG Features** To assess the performance of each neural mass model, we estimated its characteristic features, such as the main frequency, slope, and presence of harmonics, and compared them against the corresponding empirical measures obtained from resting state EEG recordings. These features are known to be informative of the underlying neural dynamics that give rise to the EEG signal. By evaluating the agreement between the model-based estimates and the empirical approximations, we can determine the extent to which the model captures the essential aspects of brain activity during rest.

### 3.1.2 Structure of parameter space

724

Alpha oscillations are generated by non-unique parameter sets, and while there may be quantitative differences in parameter values between models, their qualitative behavior may be similar. In the next section, we explore alpha regime boundaries and the necessary conditions for producing a dominant frequency in the alpha range, as a function of rate constant and connectivity parameters. We also identify any other dynamical regimes that the model may present. Parameters with similar biological interpretations between the models are compared in order to provide a meaningful comparison. To ensure consistency, all other parameters are maintained in their standard resting state setting (Tables in Supplementary S.6).

725

726

727

728

729

730

731

732

#### Rate constant parameter space dynamics

733

The JR, MDF and LW models exhibit distinct excitatory and inhibitory impulse responses that are modulated by rate constants ( $\tau_e$  and  $\tau_i$ ). These rate constants reflect collective passive dendritic cable delays and neurotransmitter kinetics associated with fast synaptic activity involving glutamatergic AMPA receptors and GABA receptors (Spiegler, 2012). This synaptic filtering is assumed to take a different shape in excitatory than in inhibitory neural populations in most of the four models, with the exception of RRW - where the same rate constant is used for AMPA as for GABA receptors. Previous studies have demonstrated that the manipulation of these rate constants can significantly impact the dominant frequency of oscillations (David and Friston, 2003; Gast et al., 2019). In our investigation, we aim to determine whether similar patterns of frequency changes can be observed across the parameter space for all three models.

734

735

736

737

738

739

740

741

742

743

744



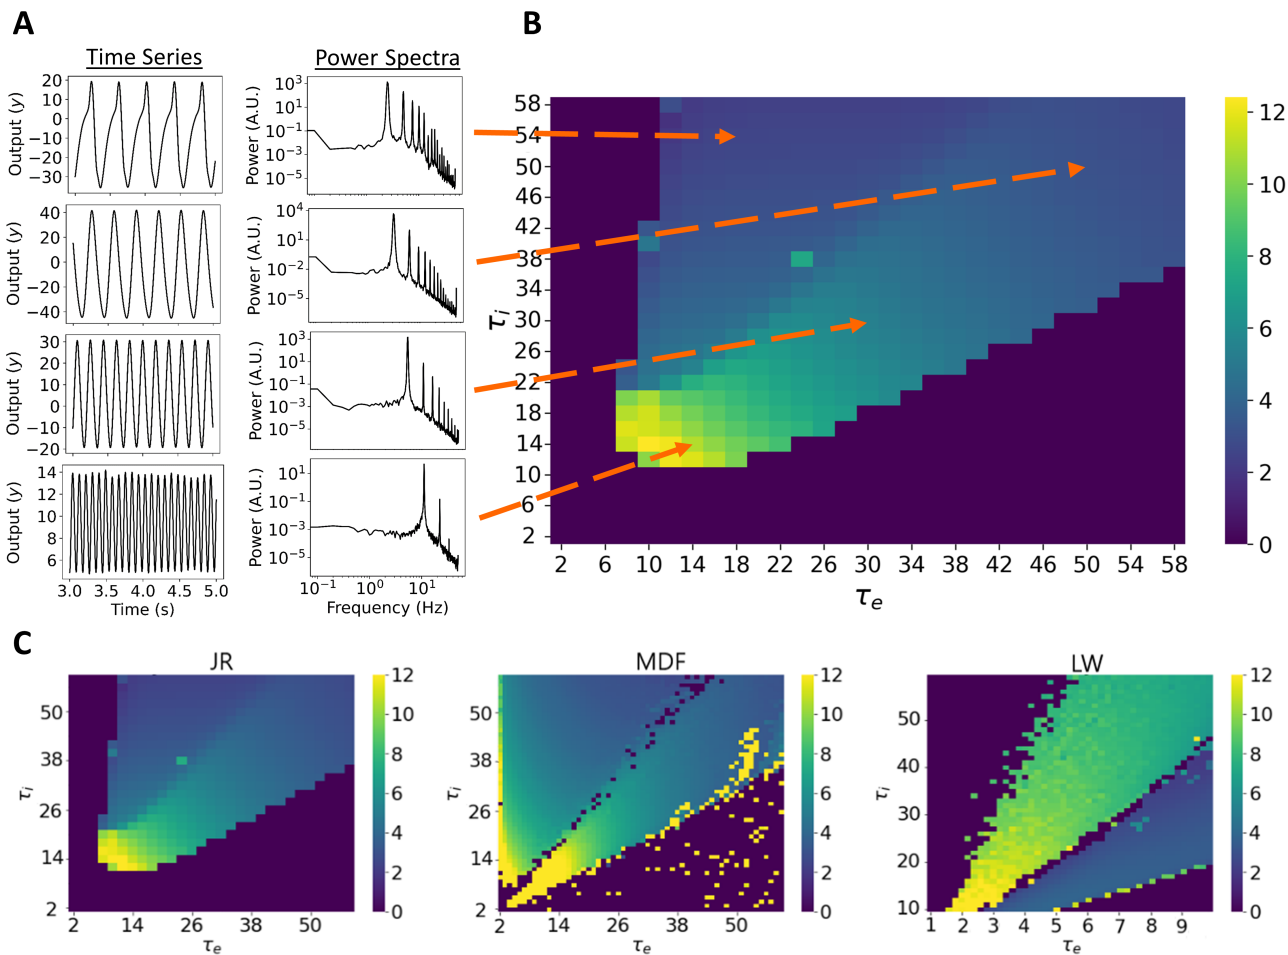

**Figure 10. Effect of rate constants on dominant frequency of oscillation for the JR, MDF, and LW models.** **A)** Example time series and power spectra of a set of specific rate constant values to show the slowing in frequency as the values of the excitatory and inhibitory rate constant increase. **B)** Heatmap presenting the dominant frequency of oscillation as a function of the rate constants of the JR model. **C)** Three heatmaps for the JR, MDF and LW with the dominant frequency of oscillation as a function of the rate constants. For JR and MDF  $\tau_e$  and  $\tau_i$  are varied from 2ms to 60ms. For LW,  $\tau_e$  changes from 1.72ms to 5ms, and  $\tau_i$  from 10 to 50ms to generate oscillatory behavior.

Across all models, a consistent trend is observed where the predominant rhythmic frequency 745  
decreases with an increase in both rate constants, aligning with previous analyses (David and 746  
Friston, 2003). For the LW model, the range of values for  $\tau_e$  and  $\tau_i$  differs due to the system's 747  
tendency to diverge if  $\tau_e$  becomes excessively high compared to  $\tau_i$ . Due to this, in Fig. 10 we 748  
constrain the possible range of values to 1-10 ms for  $\tau_e$  and 10-60 ms for  $\tau_i$ . With a uniform 749  
external input, the JR model has a peak oscillatory frequency of 12.4 Hz, falling within the 750  
high alpha / low beta range. MDF can elicit higher beta oscillations with a normal noise 751  
input when rate constant are both small. This suggests that the inclusion of self-inhibitory 752  
connections in MDF contributes to generating higher frequency oscillations. Notably, both JR 753  
and MDF exhibit a phenomenon known as a 'hypersignal' (David and Friston, 2003) when  $\tau_i$  is 754  
considerably higher than  $\tau_e$ , which is typically associated with lower frequency oscillations. In 755  
such cases, the time series does not produce an exact sinusoidal oscillation (Fig. 10). Conversely, 756  
if  $\tau_e$  becomes too high compared to  $\tau_i$ , neither model shows oscillatory patterns. This means 757

that a balance needs to be kept in order to maintain a periodic behavior, which can be achieved 758  
by keeping the product of  $H_{e,i}$  and  $\tau_{e,i}$  constant by appropriately adjusting  $H_e$  and  $H_i$  as  $\tau_e$  759  
and  $\tau_i$  is modified (David and Friston, 2003). 760

In the LW model, equivalent hypersignal behavior is observed when  $\tau_e$  is excessively high 761  
compared to  $\tau_i$ , while in the opposite case of  $\tau_i$  higher than  $\tau_e$  no oscillatory activity is seen. 762  
Furthermore, as shown in Fig. 10, this hypersignal activity occurs above the alpha regime in 763  
 $\tau_e$  vs  $\tau_i$  space for JR and MDF, and below the alpha regime for LW (Fig. 10). What these 764  
observations suggest is that the central alpha oscillatory regime in JR and MDF operates in a 765  
manner that is intrinsically different to the alpha regime in LW - a question we revisit through 766  
the lens of linear stability analyses below. 767

As expected, modifying the shape of the synaptic filtering through the rate constants has an 768  
influence on the rhythmic behavior of the system. Increasing both rate constants simultaneously 769  
leads to a decrease in the frequency of oscillation since longer delays are then introduced. For 770  
example, if a disease affects the propagation of action potentials, it could lead to a decrease 771  
in the dominant frequency of oscillation. In the RRW model,  $\tau_e$  and  $\tau_i$  are assumed to be 772  
equal, considering that the difference in rise time between AMPA and GABA-A is negligible 773  
and, therefore, the synaptic filtering is the same between excitatory and inhibitory neurons. 774  
This assumption can be questioned as changes in rate constants in the other models have been 775  
shown to affect the central frequency. 776

## Connection Strength 777

The strength of connections between neural populations plays a role in facilitating communi- 778  
cation, and thus when the strength of these connections is appropriately balanced, it enables 779  
coordinated neural activity, leading to the generation of brain rhythms. Even though on the 780  
face of it the neural populations included in the four models differ quite considerably, they all 781  
exhibit at least one common element - a principal excitatory-inhibitory ( $E - I$ ) loop. The ratio 782  
of synaptic weights within that loop relates closely to the concept of ‘E/I balance’, a widely 783  
studied physiological phenomenon that has garnered significant attention in neuroscience in 784  
recent years (Meisel et al., 2017; Zhou and Yu, 2018; Sohal and Rubenstein, 2019; Murray 785  
et al., 2014). We explored the impact of connectivity parameters on the dominant frequency 786  
of oscillation. To maintain conciseness, we exclude the connectivity parameter spaces of MDF 787  
in this section, since the patterns observed are very similar between JR and MDF, with the 788  
distinction that MDF tends to generate higher frequencies of oscillation for the same set of 789  
parameter values. A comprehensive summary of the comparison between JR and MDF can be 790  
found in Supplementary S.2. 791

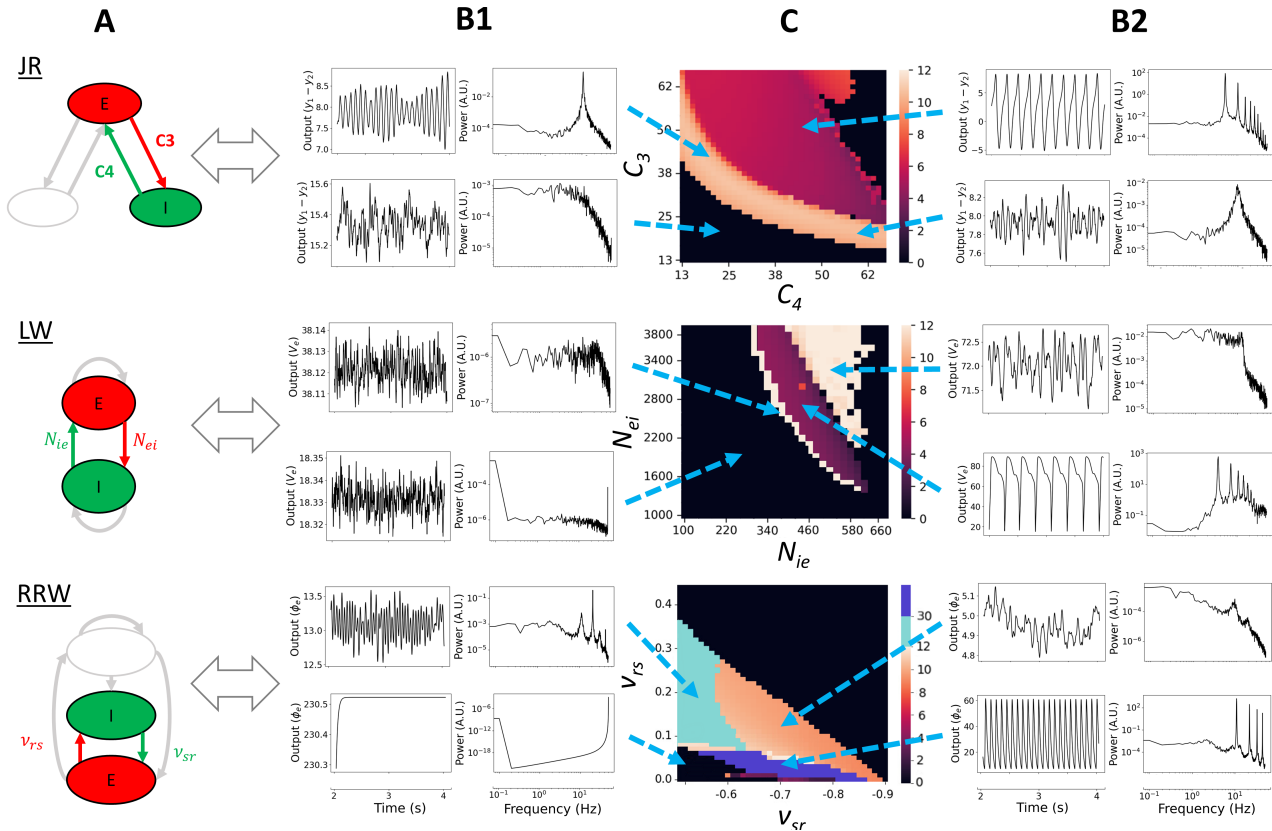

**Figure 11. Frequency of oscillation parameter spaces as a function of E-I connectivities** **A)** Schematic of the models with their principal E-I loop highlighted. These are the parameters that are going to be varied. **B1 and B2)** Time series and corresponding power spectra for specific combinations of E-I, showing different dynamics. **C)** Heatmaps presenting the dominant frequency of oscillation as a function of E-I connectivity. The dark region presents non-oscillatory or non-physiological time series. JR and LW have a clearly defined regime of lower frequency of oscillations being generated (purple and red region), whereas RRW quickly tends to produce signals of lower amplitude, or higher frequency of oscillations. In RRW, the dark blue regime indicates that the system is still oscillating but at a higher amplitude and higher frequency as the system is starting to explode. In the light blue regime, the dominant frequency of oscillation is in the beta regime. In the three models, white or orange areas correspond to alpha or higher oscillations.

JR's E-I interaction is represented by the connectivity strength between pyramidal cells and inhibitory interneurons. Since the LW model is only composed of one excitatory and one inhibitory neural population, the parameters of interest are the two synaptic weights connecting the two populations. Finally, for RRW, the reticular nucleus inhibits the relay nuclei and is considered the inhibitory population of the model. In this context, we consider the relay nuclei as having a central role and can be compared to the pyramidal cells in the JR model, as they are connected to all other populations. The excitatory-inhibitory interaction explored is then within the thalamus between the relay nuclei and the reticular nucleus. It should be noted that this interaction is not an isolated loop, because it is embedded within the larger cortex-reticular nucleus-relay nuclei loop, and so is also affected by the activity from the cortex. However, for simplicity, our focus is on the E-I interaction between the two thalamic populations.

After exploring various parameter ranges, we identified specific values that produced distinct behaviors for each model, and focused on these dynamic regimes. Results of these analyses are

shown in Fig. 11. As can be seen in the heatmaps, we observe an inverse diagonal relationship between E-I connectivity and the parameter regime giving rise to alpha frequency oscillations in all three models. This illustrates the fact that it is the total amount of E-I connectivity, or the total E-I gain, that defines the presence of alpha rhythm in these models.

A second common feature across all three models is that if the excitatory or the inhibitory connectivity is too low, non-physiological results are obtained. These include time series with either very low amplitude or very high frequency (dark region in Fig. 11 panel D), highlighting the importance of the interaction between these two populations for the generation of rich neural dynamics.

The relationship between  $C_3$  ( $P \rightarrow I$ ) and  $C_4$  ( $I \rightarrow P$ ) in JR in order to generate alpha oscillations correspond to an exponentially decaying function. A similar correspondence is observed in the LW model, although with a narrower range of possibilities due to model constraints. Furthermore, LW presents a steeper slope, indicating a stronger effect on the dynamical regime of the input from GABA interneurons ( $N_{ie}$ ) on the frequency than the input to GABA interneurons ( $N_{ei}$ ). Both the JR and LW models generate lower frequency oscillations, corresponding to the hypersignal regime, as observed in the analysis of rate constant parameter space (purple color in the JR and LW heatmaps in Fig. 11 C, rows 1 and 2). In the LW model, if the connectivities are increased beyond this regime, predominantly alpha-frequency activity is generated (triangular white zone above the purple region), which corresponds to the dynamics observed with standard connectivity parameter values. To better understand this difference, a local stability analysis was performed to define the fixed points of the JR and LW models, and expand on their dynamical characteristics (Fig. 12). In the case of JR, the colored alpha regime presents unstable fixed points that continue into the hypersignal regime. These oscillations are due to an Andronov-Hopf bifurcation, wherein the system enters a limit cycle that changes shape over time (Fig. 12, 1a and 1b). In LW, an Andronov-Hopf bifurcation also occurs, explaining the hypersignal and some higher frequencies on the left hand side of the lower frequency region (Fig. 12, 3a and 3b), including alpha. However, the alpha regime in LW generated with standard parameter values lies within the space of stable fixed points (Fig. 12, star in 3b), which corresponds to the triangular white regime in the LW heatmap (Fig. 11, C LW). This implies a separate emergent mechanism of alpha rhythm in LW that is distinct from the emergence of a limit cycle that is seen in JR. The generated alpha in this setting is noise-driven, since without noise the system becomes a damped oscillator (due to its having complex eigenvalues with negative real part), and eventually reaches the fixed point (Fig. 12, 4a and 4b). The noise fluctuations repeatedly push the system away from its fixed point at the frequency of alpha, but it tends to stay around that stable point instead of reaching a self-sustaining limit cycle oscillation. The stability analysis presented here corroborates the idea that the standard alpha rhythms generated by the LW and JR models constitute two mechanisms that are both physiologically and mathematically distinct. This is consistent with the rate constant and connectivity parameter space results as in the rate constant result, we could identify the hypersignal regime above the alpha regime for JR but below for LW, which

is also seen in the connectivity parameter space result. 845

We also conducted an investigation into the effect of low noise in the JR model (Fig. 12, 846  
2a and 2b). This analysis revealed that while the shape of the fixed points curve changed, an 847  
Andronov-Hopf bifurcation still occurred, and limit cycle trajectories are still present as can be 848  
seen in Fig. 12, 2b (star example). We note that, similarly to the rate constants analysis,  $C_3$  849  
( $P \rightarrow I$ ) and  $C_4$  ( $I \rightarrow P$ ) in JR have ranges of equal values, whereas in LW  $N_{ei}$  is significantly 850  
larger than  $N_{ie}$ . This discrepancy can be attributed to the fact that in JR there is a higher 851  
level of excitatory interactivity, due to the additional connections between pyramidal cells and 852  
excitatory interneurons ( $C_1$  ( $P \rightarrow E$ ) and  $C_2$  ( $I \rightarrow P$ )), which also have higher values than 853  
pyramidal-inhibitory interneurons. 854

As can be seen in Fig. 11, the connectivity values of the the RRW model are of a much 855  
smaller range compared to JR and LW, because they represent the connection strength (mean 856  
number of synapses times the strength of the response to a unit signal) in  $mVs$  rather than the 857  
number of synapses between neural populations. Extensive explorations of parameter spaces 858  
for this model have been conducted by several authors previously, often using a mathematically 859  
simpler reduced version that summarizes connection strengths across aggregated corticocortical, 860  
corticothalamic, and intrathalamic loops (Roberts and Robinson, 2012; Abeysuriya et al., 2015). 861  
A notable feature of these analyses using the reduced RRW model is the finding that the 862  
parameters most strongly influencing the transition from an alpha-frequency regime to lower 863  
frequency dynamics are predominantly associated with the corticothalamic loop. The values of 864  
these corticothalamic loop parameters in turn determine the effect of variation in intrathalamic 865  
loop parameters on the dynamics. In our study, employing parameter sets corresponding to 866  
EC conditions, we observed that increasing the intrathalamic connectivities simultaneously led 867  
to a decrease in the amplitude of the alpha peak, accompanied by a slight shift in the central 868  
frequency. When the change in  $\nu_{sr}$  and  $\nu_{rs}$  are sufficiently high, then the alpha peak disappears 869  
which corresponds to the dark colored upper right corner of Fig. 11, C row 3. Interestingly, 870  
similarly to the JR and LW models within the analogous parameter range, we observed in 871  
RRW an inverse relationship between  $\nu_{sr}$  and  $\nu_{rs}$ . However as  $\nu_{rs}$  becomes more negative and 872  
 $\nu_{rs}$  smaller the alpha regime reduces. Frequency increases as well as the oscillatory regime 873  
as  $\nu_{rs}$  becomes more positive. When  $-\nu_{rs}$  is smaller than 0.6, we still have alpha oscillations 874  
but there is a dominant peak in the beta range (around 20Hz) seen in B1 row 3 for RRW 875  
(light blue region). Finally, if  $\nu_{rs}$  is below 0.09 approximately the system starts to explode, 876  
resulting in either higher amplitude and frequency oscillations (B2 row 3, dark blue region) 877  
or in a continuous very high amplitude value that are not physiologically accurate (B1 row 878  
3, dark region). It seems that  $\nu_{sr}$  has an effect on the frequency of the alpha peak which 879  
correlates with previous analysis that suggested the importance of corticothalamic interactions 880  
as  $\nu_{sr}$  is part of the cortico-reticular-relay nuclei circuit. Adjusting  $\nu_{rs}$  is key in order to have 881  
an oscillatory behavior in the system emphasizing the E-I balance reflected in the other two 882  
models. However, due to the numerous connections within the model, the thalamus is probably 883  
not the sole connectivity parameter capable of having an effect on the frequency of alpha. 884

In summary, through our exploration of E-I connectivity parameter spaces in the preceding pages and in Figs. 10-12, we have demonstrated that the emergence of alpha oscillations in numerical simulations with the JR, MDF, LW, and RRW models requires the neural circuit in question to reach and maintain a sufficient level of E-I gain, whilst also not exceeding a certain threshold amount. This finding emphasizes the importance of achieving a balance between excitatory and inhibitory activity and connectivity, as alterations in this balance can lead to pathological and/or non-physiological oscillatory patterns. The connectivity parameter space results we have shown indicate in a mathematically explicit fashion how dysregulation of synaptic connectivity may contribute to abnormal brain activity. Furthermore, in LW, we observed that the dynamics of the model are more strongly influenced by inhibitory connectivity ( $N_{ie}$ ) than by excitatory connectivity ( $N_{ei}$ ). This suggests that an imbalance in the E-I ratio is more likely to be affected by the number or strength of synapses originating from GABAergic interneurons than glutamatergic ones, highlighting the significance of inhibitory interneurons and their synaptic connections in shaping the overall dynamics of the LW model. Our stability analyses showed that there are distinct mechanisms underlying alpha oscillations in JR and LW. In our analyses of the RRW model, the intrathalamic loop was seen to primarily modulate the amplitude of the alpha peak, with little influence on the dominant frequency of oscillation. Thus, in the RRW model, the dominant frequency of oscillation and the overall dynamics are predominantly modulated by the corticothalamic loop, underscoring the significance of interactions between cortex and thalamus in driving alpha rhythms according to this theory. The narrow range of parameter values leading to alpha oscillations in the RRW model suggests strong interdependencies among the parameters, which need to be carefully adjusted collectively to maintain oscillatory behavior and clearly detectable spectral peaks in model simulations.

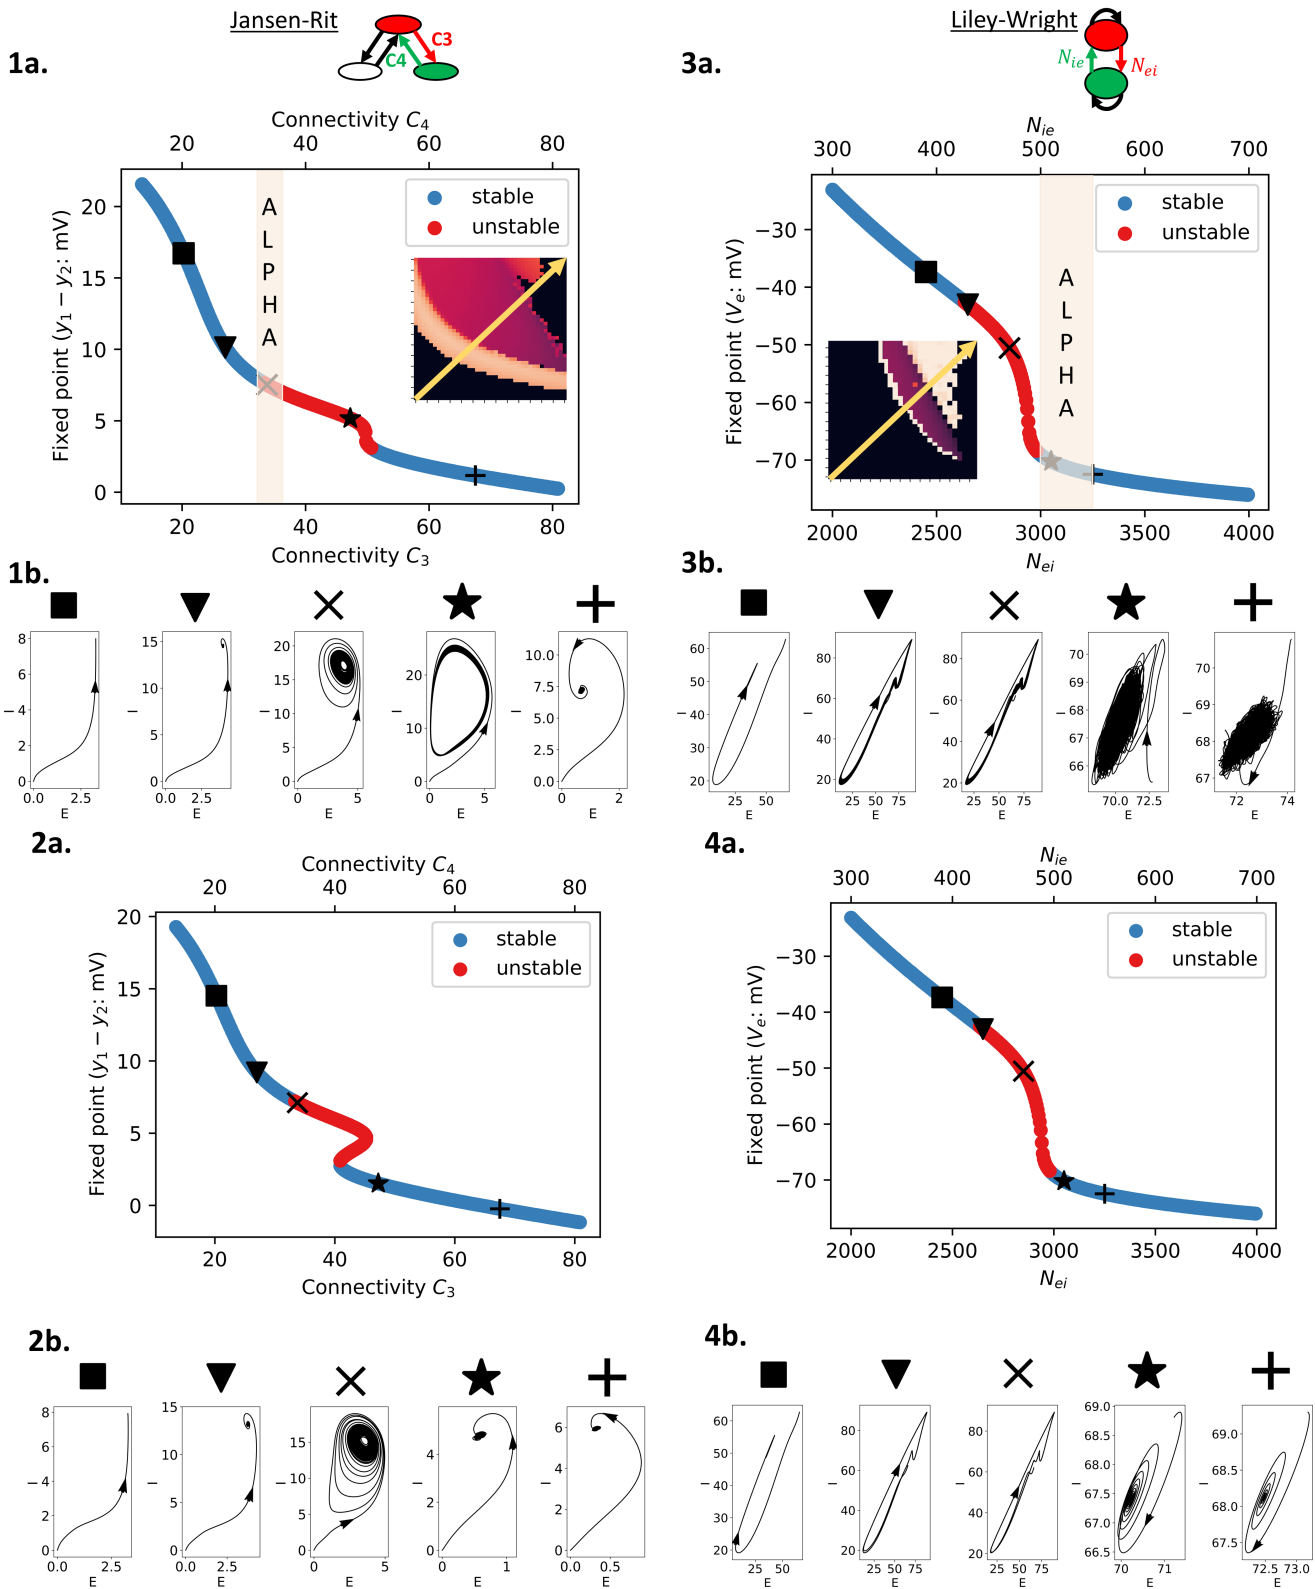

**Figure 12. Fixed points and corresponding phase planes of JR and LW at specific connectivity values with high and low noise** By performing stability analysis, the stability of the fixed points of JR and LW is determined for connectivity values intersecting across the parameter space (yellow arrow). For the JR model, **1a** and **2a** correspond to the fixed points of JR with noise and low noise, respectively, as well as their phase planes for specific values of connectivity in **1b** and **2b**. Similarly to JR, in **3a** and **4a** the fixed points of LW with noise and no noise are presented with the corresponding phase planes in **3b** and **4b**. Unstable fixed points are red, whereas stable fixed points are blue. The light orange area corresponds to the optimal connectivity parameter setting to generate alpha oscillations in each model.

These findings enhance our understanding of the relationship between E-I connectivity, alpha oscillations, and the specific mechanisms at play in the LW and JR models. They emphasize the importance of striking a balance in synaptic connectivity and shed light on the key role of cortico-thalamic interactions in generating and modulating alpha rhythms.

## 3.2 Comparative evaluation of models

Initially, our investigation involved comparing the models within the alpha regime and conducting parameter space searches to explore the different dynamical regimes. However, we have not yet explicitly compared the various components that constitute the models, including their topology, equation formulation, and parameter values. The subsequent section of our study aims to address these aspects and critically evaluate the validity of the choices made by each model. A detailed analysis of these factors is also of central importance in understanding and assessing the suitability of the respective models as theories of alpha rhythm generation.

### 3.2.1 Topology

Patches of neural tissue, such as the cortical columns (also known as macrocolumns) typically of interest in NPMs, comprise large numbers of both excitatory and inhibitory neurons that give rise to EPSPs and IPSPs, respectively. Therefore, NPMs commonly have at least a two population structure. Across the models surveyed in the present work, the most minimal topologically speaking is the LW model, which includes a single excitatory and a single inhibitory population only. Despite this simplicity, the LW is able to capture the balance between excitatory and inhibitory activity, while also including finer biological details such as synaptic reversal potentials and transmitter kinetics (e.g., ‘fast’ AMPA and ‘fast’ GABA). The LW model consists of four connections overall, including a self-connection for each population.

While the LW model, characterized by a simple structure with only a single excitatory and inhibitory population, effectively captures the balance between excitatory and inhibitory activity, there is also an interest in incorporating more neural populations to account for specific dynamics, such as adding an excitatory population. The majority of the electrical activity recorded with EEG is generated by groups of pyramidal cells (Louis et al., 2016), as they are the primary excitatory neuron in the brain, making up approximately 70 to 90% of all neurons in the cortex (Elston, 2007). They are predominantly found in layers three and five of the cerebral cortex (Louis et al., 2016). In the JR model, pyramidal cells are separately represented from other excitatory interneurons (commonly referred to as spiny stellate cells, mostly found in layer 4; David et al., 2006), yielding a model composed of three neural populations - one greater than the LW model. This additional excitatory population, and thus excitatory feedback loop stems from Katznelson’s approach to explore the importance of (long-range) excitatory connections (Jansen et al., 1993; Katznelson, 1981). Pyramidal cells interact with both excitatory and inhibitory interneurons, resulting in a total of four connections in the model. Thus, despite the difference in the number of neural populations between JR (three) and LW (two), they do



have the same number of connections. This is due to the absence of self-connections in JR. In contrast, the MDF model, which shares a similar topology to JR, introduces a self connection to its inhibitory population. This extension is motivated by experimental and theoretical evidence suggesting the necessity of such connections for high-frequency oscillations in the gamma band (Moran et al., 2007). The corticothalamic RRW model is composed of four neural populations: excitatory and inhibitory neurons in the cortex, and the (excitatory) relay and (inhibitory) reticular nuclei of the thalamus. Regarding cortical connectivities, it is assumed that the number of projections from each source neuron to each target population is proportional to the size of the target population. This leads to  $\nu_{ee} = \nu_{ie}$ ,  $\nu_{ei} = \nu_{ii}$ , and  $\nu_{es} = \nu_{is}$  implying that  $V_i = V_e$  and the inhibitory quantities are re-expressed in terms of excitatory quantities (Zhao and Robinson, 2015). Consequently, the intracortical connections correspond to  $\nu_{ee}$  and  $\nu_{ei}$ , representing the self-connection and the inhibitory input to the excitatory population respectively. The RRW model circuit has seven connections in total, with a single cortical output that extends to the thalamus. The reticular nucleus receives these inputs from the cortex, as well as a reciprocal connection from the thalamic relay nuclei. The four-node RRW topology can thus be summarized in terms of three primary loops: 1) an intrathalamic loop connecting the reticular nucleus and relay nuclei, 2) a direct corticothalamic loop linking the cortex and relay nuclei, and 3) an indirect corticothalamic loop involving the cortex, reticular nucleus, relay nuclei, and completing the circuit back to the cortex.

### 3.2.2 Equations

As noted previously, all of the models studied here characterize neural subpopulation activity within their respective circuits using at least one second-order (equivalently, two first-order) differential equation(s), combined with a nonlinear operator that describes the synapses and postsynaptic dendritic processes (Aburn et al., 2012).

Three sets of two first-order differential equations are defined to describe each neural population in JR. The model assumes that excitatory and inhibitory interneurons have identical states up to a scaling constant (Aburn et al., 2012), and pyramidal neurons synapse equally onto the excitatory and inhibitory populations (Cook et al., 2021). Mathematically, this implies that the contributions from EPSPs and IPSPs are not separately simulated for the pyramidal population, unlike the MDF model. In the MDF model, the contributions from excitatory and inhibitory populations are separately calculated to give rise to EPSPs and IPSPs. The difference between the two results in a mixture of potentials induced by excitatory and inhibitory currents, which equates to the measured local field potential (Moran et al., 2007). Additionally, the MDF model incorporates recurrent connections in the inhibitory population. This means that, compared to the JR model, the MDF model includes two additional differential equations, and the measured response corresponds to the difference between EPSPs and IPSPs. Furthermore, MDF is distinguished from the other models by its richer and more flexible sigmoid function definition, in terms of two parameters ( $\rho_1$  and  $\rho_2$ ) that determine its shape (voltage sensitivity) and position respectively. The MDF model also has the possibility to

include adaptation currents, through a parameter  $a$  which is set to 0 in our analyses. 984

Mathematically, the LW model is slightly more complex than the other three models studied 985 here, mainly due to its inclusion of an additional block for each subpopulation that converts 986 post-synaptic potentials into the soma membrane potential, allowing for the inclusion of synap- 987 tic reversal potential terms in the equations. The model consists of three distinct blocks that 988 perform specific transformations. The first block transforms the soma membrane potential into 989 firing rate with a nonlinear operator in the form of a sigmoid, as described in the methods 990 section. In the second block, the firing rate is converted into postsynaptic potential on the 991 target population (i.e. on  $I$  for the  $E \rightarrow I$  and  $I \rightarrow I$  connections, and on  $E$  for the  $I \rightarrow E$  992 and  $E \rightarrow E$  connections), representing the integrated effect of synaptic inputs. Finally, the 993 postsynaptic potential is further translated into the soma membrane potential, modelled in 994 this case according to conductance-based rules (Song et al., 2019). Unlike the other models, 995 LW thus has two state variables for each population: the postsynaptic potential and the soma 996 membrane potential. LW also includes fast excitatory and inhibitory neurotransmitter kinetics 997 not found in JR, MDF, or RRW. 998

In the RRW model, activity dynamics are nominally specified in four neural populations: 999 cortical excitatory, cortical inhibitory, thalamic reticular, and thalamic relay neurons (Robinson 1000 et al., 2002). However, as noted above, with the assumptions made in this case, the two cortical 1001 populations are not clearly separated into specific subgroups within the equations. As a result, 1002 there are no local inhibitory connections within the cortex, and only one cortical output extends 1003 to the thalamic populations - reducing the number of equations as compared for example to 1004 LW, which is a fully connected graph. The equations that govern the RRW model first describe 1005 the firing behavior of individual cells within each population. These firing cells serve as sources 1006 of pulse fields, which are treated as average spike rates in their respective populations. The 1007 propagation expressed as a damped wave equation in the RRW model, which is only taken into 1008 consideration for the cortical excitatory population since it is the only one with a finite  $\gamma_e$ , is 1009 what differentiates it from the other models. Therefore, mathematically, we observe that there 1010 is an additional  $\phi_e$  term corresponding to the average pulse density, nonexistent in the other 1011 neural populations or models. 1012

### 3.2.3 Unified parameter table 1013

One of the aims when developing and studying mathematical models, such as the four consid- 1014 ered in the present work, is to relate various model parameters to specific biological features 1015 or processes of the brain, and in so doing to more fully understand the mechanisms underlying 1016 neural activity, as well as how changes in these factors may impact brain function and behavior. 1017 This can include features such as the properties of individual neurons or synapses, the architec- 1018 ture of neural circuits, or the dynamics of different neural populations. Unfortunately however, 1019 this task can sometimes be a challenging one for NPMs, since many of the models in common 1020 use today (including all four reviewed in this paper) were formulated phenomenologically - i.e. 1021 via a top-down strategy focused on replicating activity dynamics in neural recordings, rather 1022

than the fine-grained details of neuronal circuit microstructure. 1023

It is therefore, necessary to understand the role of the different elements and the rationale 1024  
behind the choice in their values, to make them as biophysically meaningful and interpretable 1025  
as possible. To aid with this, Supplementary S.6 includes a set of tables with a brief description 1026  
of each model's parameters and their biological meaning. Although the models do often have 1027  
slightly different values for corresponding parameters, they do nevertheless often share similar 1028  
functional roles. To facilitate further comparison, an additional table is given below that aims 1029  
to relate variables of equivalent biological meaning (Table 2). 1030

Among the JR, RRW, and LW models, which use very similar expressions for their sigmoidal 1031  
transfer functions, there are three key common parameters that emerge: i) mean firing thresh- 1032  
old, ii) firing threshold variability, and iii) maximum attainable firing rate. JR, MDF, and LW, 1033  
which include both a separate excitatory and inhibitory impulse response function, have the 1034  
following shared components: maximum amplitude of EPSPs, and of IPSPs, and an excitatory 1035  
and inhibitory rate constants. Finally, every model has features representing the connections 1036  
between neural populations. The MDF model introduces additional parameters to define the 1037  
shape of the sigmoid function used in its formulation, providing easier modulation of the shape 1038  
of the sigmoid compared to the other models. In RRW, the impulse response differs, which 1039  
includes a decay and rise time of the impulse response, affecting the dynamics of the model's 1040  
dendritic filtering process. Furthermore, factors associated with corticothalamic interactions 1041  
are introduced in the RRW model to account for long-range interactions between cortical and 1042  
thalamic regions. The LW model distinguishes itself by incorporating attributes related to 1043  
synaptic reversal potentials, such as the resting membrane potential and passive membrane 1044  
decay time constant. These parameters are essential for transforming the postsynaptic poten- 1045  
tial into the soma membrane potential and incorporating synaptic reversal potentials into the 1046  
model's dynamics. 1047

### 3.2.4 Deciphering the biological basis and rationale of parameter values 1048

The systems under consideration have parameters with corresponding biological interpretations; 1049  
however, the nominal values assigned to these parameters vary considerably across the models. 1050  
The variation in parameter values across the models can be attributed to several factors, in- 1051  
cluding differences in the experimental data used to inform the models, distinct mathematical 1052  
formulations, and specific assumptions. Each model is designed to capture different aspects of 1053  
neural activity and may prioritize certain features or phenomena over others. In the following 1054  
section, we first examine the rationale behind the expression and parameters of the firing rate 1055  
function, then the impulse response, and finally the connectivity values. 1056  
1057

#### Firing rate 1058

Fig. 13 shows the firing rate curves of the four models. It can be seen here that there is some 1059  
variability in maximum neural firing rate parameters used, as well as the point of inflection 1060

| Common Parameters                    |                                     |                                          |                                                          |                                                                                      |
|--------------------------------------|-------------------------------------|------------------------------------------|----------------------------------------------------------|--------------------------------------------------------------------------------------|
| Model                                | JR                                  | MDF                                      | LW                                                       | RRW                                                                                  |
| Firing threshold (mean)              | $V_0$                               | –                                        | $\mu_{e,i}$                                              | $\Theta$                                                                             |
| Firing threshold variability         | $1/r$                               | –                                        | $\sigma_{e,i}$                                           | $\sigma'$                                                                            |
| Maximum firing rate                  | $2e_0$                              | –                                        | $S_{e,i}^{max}$                                          | $Q_{max}$                                                                            |
| Maximum EPSP amplitude               | $A$                                 | $H_e$                                    | $\Gamma_e$                                               | –                                                                                    |
| Maximum IPSP amplitude               | $B$                                 | $H_i$                                    | $\Gamma_i$                                               | –                                                                                    |
| Rate constants                       | $a$ and $b$                         | $\kappa_e$ and $\kappa_i$                | $\gamma_{e,i}$                                           | –                                                                                    |
| Connectivity                         | $C_1, C_2, C_3, C_4$                | $\gamma_1, \gamma_2, \gamma_3, \gamma_4$ | $N_{ee}^\beta, N_{ei}^\beta, N_{ie}^\beta, N_{ii}^\beta$ | $\nu_{ee}, \nu_{ei}, \nu_{es}, \nu_{se}$<br>$\nu_{sr}, \nu_{rs}, \nu_{re}, \nu_{sn}$ |
| Additional Parameters                |                                     |                                          |                                                          |                                                                                      |
| Sigmoid shape                        | $\rho_1, \rho_2$                    |                                          |                                                          |                                                                                      |
| Decay and rise time                  | $\frac{1}{\alpha}, \frac{1}{\beta}$ |                                          |                                                          |                                                                                      |
| Corticothalamic loop delay           | $t_0$                               |                                          |                                                          |                                                                                      |
| Cortical damping rate                | $\gamma_e$                          |                                          |                                                          |                                                                                      |
| Passive membrane decay time constant | $\gamma_{e,i}$                      |                                          |                                                          |                                                                                      |
| Mean resting membrane potential      | $h_{e,i}^{rest}$                    |                                          |                                                          |                                                                                      |
| Mean equilibrium potential           | $h_{e,i}^{eq}$                      |                                          |                                                          |                                                                                      |

**Table 2.** *Common parameters across models based on their biological interpretation.* Certain parameters have a similar role and a biological interpretation associated with it that is comparable between the models. The additional parameters reflect the novelty and differences proposed by each models.

of the curves. As mentioned in the previous section, MDF implements a different expression 1061  
of the sigmoid that does not include parameters equivalent to a maximum firing rate, mean 1062  
firing threshold, or standard deviation of the threshold distribution in the neural population, 1063  
but instead has two parameters defining shape and position. The maximum amplitude with 1064  
the current setting reaches 0.9, but can be tuned by modifying the parameters  $\rho_2$ . Even though 1065  
the other three models have parameters with a similar biological interpretation, the values are 1066  
considerably different. First, the maximal firing rate is equal to  $500s^{-1}$ ,  $340s^{-1}$  and  $5s^{-1}$  for 1067  
LW, RRW and JR respectively. The difference in the order of magnitude between JR and the 1068  
other two models (LW and RRW) can in part be explained by the fact that the value chosen 1069  
by Jansen and Rit in their original paper is taken from Freeman (1987), and is actually a 1070  
dimensionless normalized parameter. This quantity is expressed without units (for details on 1071  
the calculation of the maximal wave amplitude  $Q_m$  see Freeman, 1979), whereas both RRW and 1072  
LW rely on experimentally derived average values. However, in the case of RRW, the assumed 1073  
 $Q_{max}$  value was made without a clear citation mentioning it is an assumption and within units 1074  
of the measured maximum value possible (Robinson et al., 1997; Rennie et al., 1999). The 1075  
standard values from Freeman for converting membrane potential to firing rates are applied in 1076

the JR firing rate function, but the expression itself stems from Lopes da Silva et al. (1976), and the current JR model uses a simplified version of that function. In the case of RRW, the firing rate function initially corresponded to the error function introduced by Wright and Liley (1995). Since 1999, the nonlinear function in the RRW model has been a modified version of that initial error function and closely approximates it (Rennie et al., 1999). The differing source of the firing rate conversion equation between the two models explains the slight differences observed in their mathematical expressions.

The spiking threshold parameter (voltage at point of inflection in the sigmoid curve) in LW has a negative potential, due to the fact that the model includes synaptic reversal potentials. JR and RRW, in contrast, have a positive point of inflection for this parameter ( $6mV$  and  $12.92mV$  respectively). The values for the standard deviation of the threshold distribution in the neural population, which affects the steepness of the firing rate slope, are  $(1/0.56)mV$  ( $\approx 1.79mV$ ),  $5.5mV$ , and  $5.9mV$  for JR, LW, and RRW respectively.

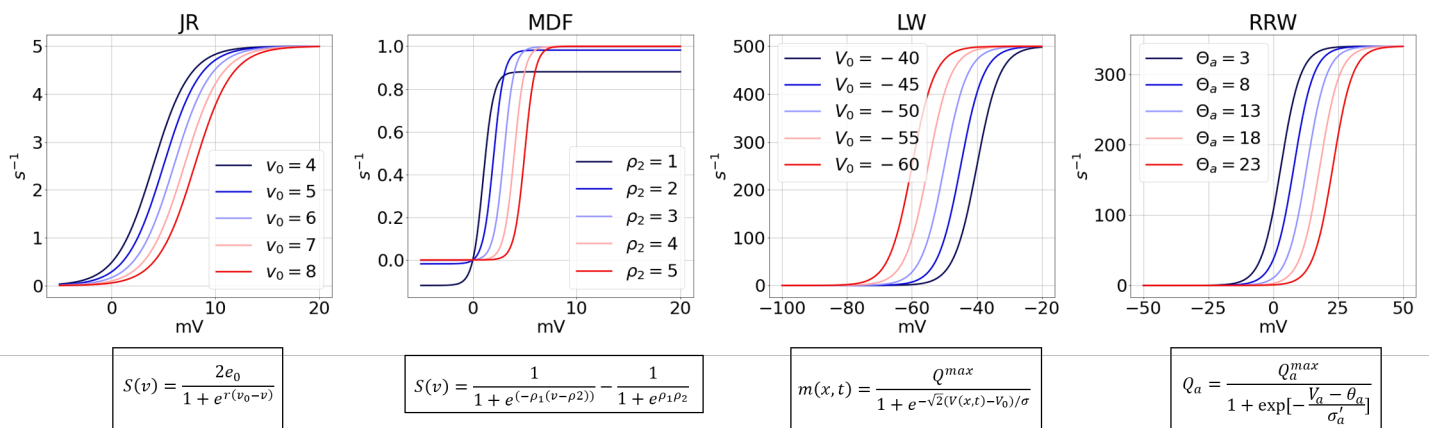

**Figure 13. Sigmoid curve of each model with firing rate against voltage with different firing threshold.** The sigmoids differ in terms of the maximum value and the voltage at which the inflection point occurs which is modulated by the firing threshold.

## Impulse response

With respect to the impulse response, the parameter values in JR can be traced back to van Rotterdam's paper in 1982 (van Rotterdam et al., 1982). The impulse response used in JR corresponds to a simplified version of expression given in Lopes Da Silva (Lopes da Silva et al., 1974, 1976). These authors determined the parameters  $A$ ,  $B$ ,  $a$  and  $b$  by respecting certain basic properties of real postsynaptic potentials, and ensuring the system produces alpha frequency oscillations (Grimbert and Faugeras, 2006a). This choice of JR to use the alpha function (unrelated to alpha rhythms) as an impulse response was originally proposed by Rall (Rall, 1967). MDF has an identical impulse response function, but some of the standard parameter values differ because in Moran et al. (2007), the authors deliberately selected 'standard' parameters that prioritize an EEG with significant power in the higher beta frequency range, aiming to showcase the impact of nonlinearities in their computational framework. The standard MDF parameters are thus adjusted in the present study to place the central frequency in the alpha

band by using comparable values to David and Friston (2003). With our adjustments to obtain 1103  
alpha oscillations, the values of the impulse response in MDF vary slightly from those in Moran 1104  
et al. (2007), such as the rate constants ( $250s^{-1}$  instead of  $100s^{-1}$  for  $\kappa_e$ ;  $62.5s^{-1}$  instead of 1105  
 $50s^{-1}$ ), but are still in the same order of magnitude. These differences are explained by the fact 1106  
that the additional self-inhibitory connection changes the behavior of the system for similar 1107  
parameter values. Thus, to simulate an equivalent alpha these need to be modified. There is 1108  
some variability across the models in the values used for EPSP and IPSP amplitudes. This has 1109  
been justified physiologically by the fact that certain neuropeptides can modulate the ampli- 1110  
tude of PSPs, meaning that some degree of freedom in choice of these values is needed (Jansen 1111  
and Rit, 1995). For the dendritic response, the original RRW model paper (Robinson et al., 1112  
1997) mentions using ‘physiologically reasonable parameters’ for the decay and rise rate ( $\alpha$  and 1113  
 $\beta$ ), and cites sources such as Freeman (1991); Lopes da Silva et al. (1974); van Rotterdam et al. 1114  
(1982) with no further details provided. It is surprising that the peak of the dendritic response 1115  
is around 60mV, which is considerably higher than the other models. LW, on the other hand, 1116  
has a lower potential peak amplitude, which can may be due the fact that other models repre- 1117  
sent the voltage at the soma, whereas LW expresses it at the site of synaptic activation (Liley 1118  
et al., 2001). One of the status intentions of the LW model relative to its predecessors was to 1119  
be more physiologically realistic, and thus allow greater biological validity and interpretability 1120  
of its parameters (Liley et al., 2001); however it is notable that very little detail is given about 1121  
the sources for chosen parameter values. Overall, an anatomical assumption made is that the 1122  
amplitude of the inhibitory impulse response is larger than the excitatory impulse response, 1123  
due to the fact that the former have axon terminals closer to the cell body, thereby leading to 1124  
larger perturbation upon synaptic transmission (Kandel et al., 2000; Cook et al., 2021). LW 1125  
makes the (reasonable) assumption that excitatory impulses occur on a faster timescale than 1126  
inhibitory impulses, which is shared with JR and MDF, but notably not with RRW. In Fig. 1127  
14, the shape of each model’s excitatory and inhibitory impulse responses are shown, with their 1128  
nominal varying rate constant values. As the rate constant increases, the curve widens and the 1129  
decay time increases. In the case of RRW but not JR, MDF, or LW, variation of the decay 1130  
time also leads to changes both slope and the magnitude of the impulse response curve. 1131

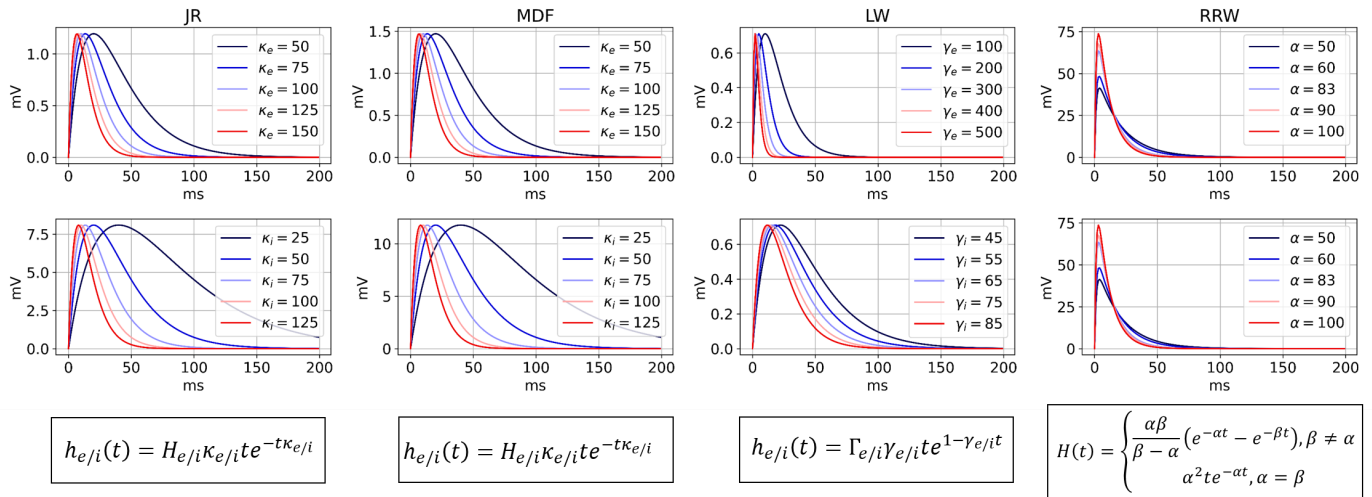

**Figure 14. Impulse response of excitatory and inhibitory population with varying rate constant**  
 Top: EPSP; Bottom: IPSP; except for RRW which uses the same dendritic response curve for EPSP and IPSP. The general shape of EPSP and IPSP between the models is consistent and mainly differ in terms of amplitude. Rate constant is varied for the first three models and for RRW, the different curves correspond to varying decay times.

## Connectivity

Connectivity parameters across the four models differ in their units and physiological interpretation, making direct comparisons of specific values challenging. In JR and MDF, the connectivity parameter values are dimensionless, and proportional to the average number of synapses between populations, thus account for the total number of synapses (Jansen and Rit, 1995). Based on several neuroanatomical studies (Braitenberg and Schüz, 2013; Larkman, 1991; Liu et al., 1991; Elhanany and White, 1990) that estimated these quantities by counting synapses. With these studies, Jansen and Rit condensed the four connections into fractions of a single parameter C (Grimbert and Faugeras, 2006b). Since Jansen and Rit estimated that the global parameter C would most likely change primarily due to its role in capturing synaptic phenomena like neurotransmitter depletion, this reduction has been useful in determining the overall effect of variations in connectivity while keeping their proportions to each other identical. LW has parameters representing the total number of connections between the two populations, which take higher values for excitatory neurons as 80% of cortical neurons are excitatory, vs 20% that are inhibitory neurons (Cook et al., 2021). Furthermore, anatomical estimates for each connection were derived using an equation that considers the diameter of the mean dendrite and intracortical axon, the mean total length of all dendritic and intracortical axonal arborizations, the mean length of the pyramidal cell's basal dendritic arborizations, and the neuronal density (as described in Liley et al., 2001 and outlined in Liley and Wright, 1994). RRW has connectivity variables denoted as  $\nu_{ab}$ , which correspond to the mean number of synapses (anatomical or structural in nature) multiplied by the strength of the response to a unit signal expressed in units as  $mVs$  (related to physiology or functionality) (Rennie et al., 1999; Robinson et al., 1997; Rall, 1967).

This section aims to compile the origin of the mathematical expressions as well as parameter

values by retracing the literature, and discerning the biological associations. Our comparative evaluation has found that even though the formulation of the firing rate curves is similar between JR, LW and RRW, their mathematical origin differs, with Lopes da Silva et al. (1976) as a reference for JR, and the error function introduced by Wright and Liley (1995) for LW and RRW. This explains the variations in the parameter values. Finally, our goal is to provide a comprehensive comparison across all levels for the four models. With regards to the parameters of the impulse response, some degrees of freedom are accepted, and the parameter values are mentioned to be within reasonable physiological ranges. Finally, connectivity parameters can represent a proportion of the average number of synapses (JR and MDF), a total number of synapses (LW), or synaptic strengths (RRW). Although the specific parameter values may vary for the firing rate and the impulse response, modifying them uniformly yields a consistent effect across the two curves (Figs. 13 and 14). Similarly, as shown in Fig. 11, correspondences can be made in the effects of altering connectivities.

## 4 Discussion

### 4.1 Summary of main findings

In this paper we have undertaken a systematic investigation into the major mathematically-expressed physiological theories of EEG alpha rhythmogenesis. This has centred around an in-depth comparison of four primary models (JR, MDF, LW, RRW) that predominate in the literature, which also cover the two main alpha theory types (intracortical and corticothalamic Nunez et al., 2006). By clarifying at a technical and a conceptual level the relationships between the four models, our aim has been to prepare the ground for future experimental and theoretical work aimed at directly testing between alternative alpha theories, and other related research questions.

We first examined the mathematical expression of each model, highlighting common elements and important differences. We then explored the parameter space of each model to identify the necessary conditions to produce alpha rhythms, with a focus on the rate constant and E-I connectivity strength parameters. In the process of this didactic and comparative treatment of the assumptions and component features across these four models, we have reported a number of confirmatory simulation results, as well as several novel findings.

One major conclusion from our analyses is that, although the four models considered differ in their basic elements such as nominal cell types, microcircuit topologies, and connectivity assumptions (to name just a few), they are ultimately more similar to one another than they are different. Specifically, all the models can reproduce the characteristic features of resting state alpha observed in empirical EEG data, albeit with varying degrees of accuracy (Fig. 9). RRW appears to better capture the  $1/f$  scaling compared to the other three models (Fig. 9, A), while the alpha blocking (EC to EO) is more attenuated in JR and LW (Fig. 9, B). This phenomenon has been previously studied directly with the RRW (Robinson et al., 2004) and LW



(Hartoyo et al., 2020) models, and so we based our analyses around the parameter sets described in this prior literature. For JR, we found limited prior work on alpha blocking directly and opted to model this effect by increasing the external input  $p(t)$ , analogously to recent studies using LW, where the external input to the inhibitory population is increased to obtain an alpha attenuation. Interestingly, even though  $p(t)$  (representing increased visual input) was applied to the excitatory population in these simulations, we still observed attenuation of population firing rates and EEG alpha power.

We studied the effect of changing the rate constant on the dominant frequency of oscillation across all four models (Fig. 10). Although this has been previously studied for the JR model David and Friston (2003); David et al. (2006); Gast et al. (2019), the concurrent comparison of JR with MDF and LW models has not been reported in prior work. These comparative simulation analyses clearly show the larger range of oscillatory behavior demonstrated by the MDF model, as well as the differing position of the hypersignal regime between JR, MDF, and LW. The observation of broadly similar trends across all of the models shows how the rate constants fundamentally influence the dynamical behavior of these systems. These results potentially raise questions about the somewhat restrictive assumption in RRW, which does not specify distinct rate constants for excitatory and inhibitory synaptic responses. In addition to exploring the rate constant parameters, we also studied the E-I connection strengths of the models (Fig. 11). Through this investigation, we found that changes in the gain of the E-I loop have a significant impact on the dynamics observed in all models. In JR, the total connectivity strength of the inhibitory loop determines the oscillatory regime of the model. For RRW, as the intrathalamic inhibitory connection increases, the value of the excitatory connection becomes more determinant of whether an alpha rhythm with significant amplitude is generated. Finally, we observed that changes in the number and strength of GABA interneuron synapses in the LW model tend to have a more prominent effect on the dynamics compared to the corresponding GABA-related parameters of the other models.

When exploring the stability of the JR and LW models, we discovered that the standard alpha oscillation generated for nominal default alpha parameters by each of them stems from different mechanisms, mathematically speaking: a self-sustained limit-cycle for JR or noise-driven fluctuations around a fixed point for LW. In the RRW model, we observed that the intrathalamic E-I loop also plays a crucial role in modulating the general dynamics of the alpha oscillation. Decreases in inhibition lead to a dominant peak in the beta regime and a slight shift in the alpha central frequency. However, the primary function of the RRW intrathalamic loop (within the parameter regimes studied) is to modulate the magnitude of the alpha peak.

The final part of our comparative evaluation of the four alpha models highlighted their topological and mathematical differences. Tracing through cited sources and other available information in the literature, we were able to distill and clarify the various rationales behind the selection of reported parameter values. Despite variations in these values across models, their impact on the shape of both the sigmoid and impulse response remains consistent and qualitatively similar (Figs. 13-14).

From our investigation, where we have observed largely similar capacities to generate spectral EEG features such as alpha, alpha blocking, 1/f background, etc., it remains unclear whether the intracortical or corticothalamic theory type is best supported by the evidence and other theoretical considerations surveyed in this study. Ultimately, from a pragmatic point of view, the selection of a model in a research context depends on the goal of the study, its capacity to represent certain features of neural activity, and its inclusion of relevant biological details. While our analyses suggest that mesoscopic scale empirical data such as human scalp EEG signals may be insufficient to advance one alpha theory over another one, our investigation helps to clarify the role of the E-I loop in each model, how the synaptic gains influence the represented dynamics, and the implications of these in various alpha mechanisms. These factors are valuable in studies of how an imbalance in E-I can lead to altered dynamics, such as different oscillatory patterns or reduced alpha magnitude, which are associated with various neural pathologies and disorders (Eichler and Meier, 2008; Li et al., 2022).

## 4.2 Model limitations and critique

NPMs offer a valuable framework for studying the dynamical behavior of the brain at the mesoscopic scale, particularly when investigating phenomena observed at the level of neural populations, as is the case for data modalities such as EEG, MEG, LFPs, ECoG, fMRI, PET, fNIRS, and wide-field calcium imaging. However, the (relative) simplicity of this methodology compared with more spatially fine-grained modelling approaches comes with a trade-off, as the coarse-grained nature of NPMs necessarily sacrifices many important neurobiological details. One major limitation that often results from the simplifications, approximations, and assumptions inherent in all NPMs is the lack of a clear correspondence between model variables/parameters and measurable quantities in real neuronal tissue. This poses challenges for both model parameterization and validation. In some cases, certain values, such as connectivity parameters between neural populations in the cortex, may be arbitrarily chosen due to the lack of verifiable estimates in terms of magnitudes (Cook et al., 2021). Moreover, the primary experimental measurements used for validation in much of the modelling literature reviewed here are human EEG data, which are conventionally assumed to be driven by cortical excitatory (pyramidal) neurons. Many state variables in the models (cortical inhibitory populations, thalamic populations) are thus not directly captured in the measurement models based on scalp EEG alone, and it may well be the case that EEG contains insufficient information to effectively distinguish between different models. In the case of RRW, complementary data such as LFPs from surgically implanted electrodes in the thalamic reticular and relay nuclei, may help considerably. Given current trends in neuroscience recording technologies, combined electrophysiological and optical imaging in rodents seems the most promising source of neural recording data that addresses the shortfalls with human EEG, although species differences between rodents and humans are also a non-trivial consideration.

Even though NPMs can serve as a bridge between the microscopic states of individual spiking neurons and macroscopic global brain states at the mesoscopic scale (Goldman et al., 2019),

this link is alas rarely a straightforward one (Huang and Lin, 2021), with various assumptions and abstractions such as microcircuit cell types, inclusion/exclusion of glial cells, and nominal physical units breaking down beyond a certain point. This challenge often leads to a disconnect between our understanding of brain activities observed at different spatial scales (Cook et al., 2021).

Since our models can be categorized as NMMs, it is important to acknowledge that the nature of NMMs introduces certain limitations due to the underlying assumptions they rely on. Firstly, the states of the neurons across the modelled ensemble are assumed to be uncorrelated (Breakspear, 2017). As a result, NMMs neglect potential fluctuations in the level of within-population synchrony in neuronal firing rates (Glomb et al., 2021). This omission thus disregards any potential effects that within-population synchrony may have on observed EEG responses. This strong coherence assumption among the neurons means that the variance of neuronal states is fixed for NMMs. Thus, this neuronal variability is not taken into account, even though it might play an important role in observed EEG responses (Marreiros et al., 2008). Additionally, the common use of a sigmoidal function in NMMs to transform the membrane potential into a firing rate is not derived from a biophysically detailed description of spiking neurons (Huang and Lin, 2021; Byrne et al., 2020) but rather is a phenomenological approximation. Individual neuron firing thresholds, which vary considerably from cell to cell within an ensemble, are thus not considered in these models.

Despite these caveats, NPMs remain the most suitable approach for representing brain dynamics observed at the meso/macro scale in modalities such as scalp EEG. These models offer simplicity and computational efficiency due to their low dimensionality, making them well-suited for numerical simulations as well as parameter estimation (David et al., 2006; Abeysuriya et al., 2014; Momi et al., 2023). NPMs also allow for the establishment of linearized or analytical correspondences, enabling researchers to gain further mathematical insights into a given model's putative physiological mechanisms.

In addition to limitations inherent to all NPMs, each of the four models also has its own advantages and limitations. JR, for example, is constrained in its oscillatory range, with limited ability to generate high frequencies. In contrast, the MDF model attempts to address this limitation by including a self-inhibitory connection. Furthermore, an external drive is necessary in JR to generate stable (alpha) oscillations, which somewhat contradicts the empirical observation that prominent alpha rhythm is seen when subjects have their eyes-closed, and thus in the relative absence of a strong sensory-driven stimulation to the occipital cortex. Since an external drive is necessary in order to generate oscillations, it can be considered that the model does not reflect self-consistent intrinsic oscillations (Kiani et al., 2021). Nevertheless, it's worth noting that the external drive might also be attributed to input from the thalamus, aligning with the concept of corticothalamic connections contributing to intrinsic alpha oscillations. However, this stance presents a nuanced perspective, slightly diverging from our alpha blocking analysis. While a certain level of external input ( $p(t)$ ) is essential for alpha rhythm generation, our findings indicate that beyond a specific threshold, an increase in  $p(t)$  results in

a decrease in alpha rhythm amplitude. This introduces a degree of ambiguity concerning the biological role of the thalamus, particularly when considering that increased corticothalamic activity in the RRW is associated with higher alpha peaks.

The MDF model shares many of these advantages with JR, additionally incorporating recurrent intrinsic inhibitory connections to generate oscillations in higher frequency ranges (gamma band). The MDF model, as introduced in Moran et al. (2007), also includes spike-rate adaptation terms, although we have omitted these extra equations here for simplicity. It is however worth noting that although the choice of the sigmoid function used by the MDF model allows for better flexibility in parameterization of the wave-to-pulse operator, the additional parameters used for this have no or little relationship to biological elements.

The LW model, by including several conductance-based elements in its formulation such as synaptic reversal potentials, is most faithful to neurobiology of the four models, at the cost of additional nonlinearities and other complexities. In practice, LW is less flexible and more constrained than the other NMMs considered here, as it is highly prone to numerical instability and divergence. Due to its richer parameterization, the LW model can nevertheless display several qualitatively different dynamical regimes - namely alpha-frequency limit cycle oscillations, noise-driven activity, or chaos. This diverse repertoire can also make interpretation and identification of continuous dynamics challenging (Liley et al., 2001).

Finally, a chief limitation of the RRW model as compared to the other three is its characterization of EPSPs and IPSPs with the same impulse response equation. This approximation has been a subject of debate, since, for example, our findings in the present work indicate that excitatory and inhibitory rate constants significantly influence the dominant frequency of oscillation. Previous studies have extensively analyzed the RRW model mathematically, particularly its linearized form, which offers a highly flexible and accurate estimation of EEG power spectrum feature, and these investigations have demonstrated the model's capability to generate oscillations at different frequencies, across various brain states and neuropathologies (Roberts and Robinson, 2008; Zhao and Robinson, 2015; Müller et al., 2017). However, the various assumptions made to obtain this tractable version of the model can be discussed (local activity approximation, cortical connectivity approximation, and similar synaptic filtering for AMPA and GABA).

Table 5 offers a global comparative analysis of the four models, outlining their strengths and weaknesses in various aspects, which can be summarized as follows: the JR model distinguishes between EPSPs and IPSPs, along with a separation of pyramidal cells from other excitatory interneurons. The strength of this model lies in its ability to showcase robust global dynamics. However, it has limitations concerning the biological significance of its parameters, the range of oscillatory behavior, and the general shape of the power spectrum. The MDF model shares similar strengths with JR, with the exception that it can achieve simulations with a higher frequency of oscillation, offering a broader range of possibilities. Nevertheless, it also shares similar limitations with the JR model in terms of parameter significance and power spectrum shape. On the other hand, LW and RRW exhibit strengths in terms of the biological association

| Feature                                 | JR | MDF | LW | RRW |
|-----------------------------------------|----|-----|----|-----|
| Biological significance of Parameters   | -  | -   | +  | +   |
| Differentiation between EPSP and IPSP   | +  | +   | +  | -   |
| Oscillatory range                       | -  | +   | +  | +   |
| General shape of PS                     | -  | -   | -  | +   |
| Robust Demonstration of Global Dynamics | +  | +   | -  | -   |
| Separation of Pyramidal Cells           | +  | +   | -  | -   |

**Table 3. Global evaluation of the models.** Different features of the models are assessed, highlighting strengths and limitations. In terms of robustness and tractability, the JR and MDF models prove more suitable. The LW model incorporates more physiological elements, and the RRW model shows a stronger capability in reproducing empirical features of alpha activity.

of parameters based on experimental studies, and they propose a considerable range of oscillatory frequencies. However, due to their complexity demonstrating robust global dynamics is more challenging. Furthermore, the RRW model emerges as a promising model for reproducing important empirical features, such as the  $1/f$  curve.

### 4.3 Alternative models of alpha rhythm beyond NPMs

In this paper we have elaborated on a select few NPMs that specifically address alpha oscillations, following the corticocortical or corticothalamic alpha theory candidates summarized in Fig. 2. It is also important to note however that alpha rhythms have been studied by researchers at a variety of scales using models ranging from microscopic to macroscopic perspectives. Many of these extend beyond the scope of the present work due to being either not (mesoscale) NPMs, or not corresponding to the corticocortical/corticothalamic theory types. In this final section we review briefly a selection of this broader body of work developing alternative alpha rhythm and related computational models.

#### 4.3.1 Two levels down: multicompartamental microcircuit models

Multicompartamental models are the most established ‘low-level’ description of single-neuron structure and dynamics, aiming to replicate as faithfully as possible their morphological characteristics, membrane biophysics, and synaptic kinetics within the mathematical framework of equivalent electrical circuits. In multicompartamental models, the activity of the neurons are described with the Hodgkin-Huxley equations. This approach can capture the complex electrical signaling that occurs within neurons and can provide a more accurate representation of how neurons interact with one another in neural circuits. Mesoscale dynamical phenomena such as oscillations are usually studied with this approach as emergent properties of networks containing hundreds or thousands of multicompartamental neurons, designed according to known architectural features of specific brain structures such as cortex (Hay et al., 2011), thalamus

(Iavarone et al., 2023), or hippocampus (Chatzikalymniou et al., 2021). Interestingly, despite the prominence of this general modelling paradigm in computational neuroscience, there are (to our knowledge) no established and/or consistently explored models of multicompartmental circuit models of EEG alpha.

An influential line of work in this area was first introduced by Jones et al. (2009), and continued more recently (Neymotin et al., 2020; Studenova et al., 2022). These authors used a multicompartmental circuit model to simulate the  $\mu$  rhythm, the somatosensory analogue of occipital alpha. The extent to which this model constitutes a ‘true’ alpha rhythm model is unclear, however, since a major component of the circuit described in Jones et al. (2009) is a pacemaker-like 10Hz thalamic drive. More recently, Hay and colleagues developed a detailed columnar microcircuit model (L2/3), based closely on newly-characterized morphological and electrophysiological properties of human cortical tissue, which has been shown to generate resting state EEG features such as the alpha rhythm (Yao et al., 2022; Mazza et al., 2022). Specifically, the model was used to investigate the effects of reduced cortical inhibition by somatostatin-expressing (SST) interneurons, a key element in the altered inhibition observed in treatment-resistant major depressive disorder. Comparing simulated healthy resting state EEG with depressed EEG (characterized by reduced SST) revealed significant changes in EEG. This discovery provides biomarkers that establish a connection between interneuron inhibition levels and quantifiable EEG patterns, thereby facilitating the identification of depression subtypes and the noninvasive monitoring of cortical inhibition modulation.

#### 4.3.2 One level down: spiking neuron network models

Whilst the individual elements in morphologically detailed circuit models such as those reviewed above are able to capture most of the known physiological properties of single neurons, they are potentially a suboptimal level of description for modelling oscillatory neuron behaviour that occurs due to (micro-scale) network organization. Spiking neuron models, which aim to capture accurately the membrane potential and firing dynamics of individual cells, but not their extended spatial structure, are the most commonly employed level of description in computational neuroscience for purely network-based activity patterns.

One notable example of this was described in the seminal paper of Izhikevich (2003), where the influential phenomenological single-neuron model was introduced, that is able to accurately reproduce neuronal spiking dynamics without the full complement of Hodgkin-Huxley ionic currents (Izhikevich, 2003). By simulating a network of 1000 randomly spiking neurons of this kind, alpha and gamma rhythms could also be generated. Subsequently, this model was used as the basic component of a large-scale representation of the mammalian thalamocortical system, which featured 22 neuronal cell types, six-layered cortical microcircuits, multiple thalamic nuclei, and white matter connectivity informed by diffusion-weighted MRI tractography (Izhikevich and Edelman, 2008). From their simulations with this model, the authors suggest that variations in rhythmic frequencies across different brain regions may arise from differences in white matter connectivity between and among cortical areas.

### 4.3.3 One level up: whole-brain NPMs

The large-scale spiking neuron model of (Izhikevich and Edelman, 2008) is an interesting early example of whole-brain modelling Griffiths et al. (2022), a sub-field of computational neuroscience that emerged in the mid 2000s, drawing strongly on developments in neuroimaging connectomics.

Whilst spiking network models have been employed with varying levels of anatomical precision in whole-brain modelling studies (Deco et al., 2013; Pronold et al., 2023), they have not been used extensively to study alpha rhythms specifically. Rather, whole-brain models of EEG alpha activity have for the most part used NPMs, of the kind discussed extensively in the present work (Stefanovski et al., 2019; Griffiths et al., 2020; Abeysuriya et al., 2018). The essential level of description in this case, notwithstanding some properties that result from large-scale network interactions and delays, for the most part the key level of analysis for understanding whole-brain networks of coupled NPMs is in fact individual NPM units themselves. From this point of view, the survey presented in the present work is of fundamental relevance to whole-brain alpha NPM models. Even though we have not explored here the question of how NPMs behave when coupled together into networks. The interesting case where this heuristic does not apply is when the alpha-generating mechanism in a whole-brain model occurs at the network level, and not at the level of individual nodes or NPM units.

The motivating argument here, which applies equally to whole-brain vs. single-node NPMs and to microcircuit network vs. single-cell models, is that the emergent properties of interconnected neuronal ensembles may be unrelated to the activity of individual neurons (Raj et al., 2020). The extensive complexity introduced by numerous equations and parameters in more complex models can in this case become a ‘black box’, limiting the ability to draw conclusions on the core network-level rhythmogenic mechanisms (Taher, 2021; Türker and Powers, 2005).

An important new line of research motivated by these considerations is the spectral graph theory framework proposed by Raj et al. (2020). These authors introduced a hierarchical, linear, analytic spectral graph model capable of replicating empirical MEG spectra and the spatial distribution of alpha and beta frequency bands (Raj et al., 2020). Compared to BNMs and NFMs, the advantage of this type of modelling lies in providing steady-state frequency responses obtained from the eigendecomposition of a graph Laplacian, offering a closed-form solution of brain oscillations (Verma et al., 2022). This makes them computationally efficient and less time-consuming. However, a major limitation is the lack of clear biological interpretability in the local parameters and gain terms of simpler spectral graph models. A more recent modified spectral graph model by Verma et al. revisited Raj et al.’s work using a bottom-up approach to make it more biophysically relatable at the local scale while still capable of representing the same spatial patterns as the original model (Verma et al., 2022). Despite this improvement, spectral graph models may not be ultimately suitable for capturing the full range of dynamical solutions, which could be effectively addressed by nonlinear BNMs (Verma et al., 2022).

## 4.4 Conclusion and future work

In conclusion, our comparative analysis of the JR, MDF, LW, and RRW models elucidate the relationship between their mathematical formulations and parameters, and providing a range of biological insights. Our novel simulations with these models showed differing levels of precision in replicating EEG alpha characteristics, demonstrating how their dynamical behavior is impacted by rate constants and connectivity parameters.

Future computational studies of alpha rhythmogenesis in human EEG should include investigations of intracortical and corticothalamic models at the scale of the whole brain. This is particularly important since, as we have discussed, mesoscale empirical data at the level of single neural populations alone, which has been our focus in this paper, may be insufficient to distinguish between these two theories. A key objective of these investigations should be to determine conclusively whether the contribution of the thalamus is essential for the generation of resting state alpha oscillations. We hypothesize that topographic variation in oscillatory brain activity, as well as network-level connectivity and dynamics, will provide important additional information for this objective. Furthermore, at the whole-brain level, each node is part of a larger network, and so the dynamics of the neural populations studied in the present work may be modified substantially when interconnected via the connectome. Finally, improving validation methods against empirical data, for example by extending the number and type of EEG features used for model comparison and fitting, would allow for better differentiation between models and determination of which ones are more accurate representations of observed brain dynamics.

## References

- E. Abela, A. D. Pawley, C. Tangwiriyasakul, S. N. Yaakub, F. A. Chowdhury, R. D. Elwes, F. Brunnhuber, and M. P. Richardson. Slower alpha rhythm associates with poorer seizure control in epilepsy. *Annals of clinical and translational neurology*, 6(2):333–343, 2019.
- R. Abeysuriya, C. Rennie, and P. Robinson. Physiologically based arousal state estimation and dynamics. *Journal of Neuroscience Methods*, 253:55–69, 2015.
- R. G. Abeysuriya, C. J. Rennie, and P. A. Robinson. Prediction and verification of nonlinear sleep spindle harmonic oscillations. *Journal of Theoretical Biology*, 344:70–77, 2014.
- R. G. Abeysuriya, J. Hadida, S. N. Sotiropoulos, S. Jbabdi, R. Becker, B. A. Hunt, M. J. Brookes, and M. W. Woolrich. A biophysical model of dynamic balancing of excitation and inhibition in fast oscillatory large-scale networks. *PLoS computational biology*, 14(2): e1006007, 2018.
- P. A. Abhang, B. W. Gawali, and S. C. Mehrotra. Chapter 2 - technological basics of eeg recording and operation of apparatus. In P. A. Abhang, B. W. Gawali, and S. C. Mehrotra, editors, *Introduction to EEG- and Speech-Based Emotion Recognition*, pages 19–50. Academic



- Press, 2016. ISBN 978-0-12-804490-2. doi: <https://doi.org/10.1016/B978-0-12-804490-2-00002-6>. 1491  
1492
- M. Aburn, C. Holmes, J. Roberts, T. Boonstra, and M. Breakspear. Critical fluctuations in 1493  
cortical models near instability. *Frontiers in Physiology*, 3, 2012. ISSN 1664-042X. doi: 1494  
[10.3389/fphys.2012.00331](https://doi.org/10.3389/fphys.2012.00331). 1495
- E. D. Adrian and B. H. Matthews. The berger rhythm: potential changes from the occipital 1496  
lobes in man. *Brain*, 57(4):355–385, 1934. 1497
- R. J. Barry and F. M. De Blasio. Eeg differences between eyes-closed and eyes-open resting 1498  
remain in healthy ageing. *Biological psychology*, 129:293–304, 2017. 1499
- E. Başar and B. Güntekin. A short review of alpha activity in cognitive processes and in 1500  
cognitive impairment. *International Journal of Psychophysiology*, 86(1):25–38, 2012. 1501
- E. Başar. Brain oscillations in neuropsychiatric disease. *Dialogues Clin Neurosci*, 15(3):291–300, 1502  
Sep 2013. 1503
- H. Berger. Über das elektroencephalogramm des menschen. *Archiv für psychiatrie und ner- 1504  
venkrankheiten*, 87(1):527–570, 1929. 1505
- R. L. Beurle. Properties of a mass of cells capable of regenerating pulses. *Philosophical Trans- 1506  
actions of the Royal Society of London. Series B, Biological Sciences*, pages 55–94, 1956. 1507
- B. S. Bhattacharya, D. Coyle, and L. P. Maguire. A thalamo–cortico–thalamic neural mass 1508  
model to study alpha rhythms in alzheimer’s disease. *Neural networks*, 24(6):631–645, 2011. 1509
- B. S. M. Bhattacharya. Implementing the cellular mechanisms of synaptic transmission in a 1510  
neural mass model of the thalamo-cortical circuitry. *Frontiers in computational neuroscience*, 1511  
7:81, 2013. 1512
- I. Bojak. Neural population models and cortical field theory: overview. 2014. 1513
- A. Bollimunta, Y. Chen, C. E. Schroeder, and M. Ding. Neuronal mechanisms of cortical alpha 1514  
oscillations in awake-behaving macaques. *Journal of Neuroscience*, 28(40):9976–9988, 2008. 1515
- A. Bollimunta, J. Mo, C. E. Schroeder, and M. Ding. Neuronal mechanisms and attentional 1516  
modulation of corticothalamic alpha oscillations. *Journal of Neuroscience*, 31(13):4935–4943, 1517  
2011. 1518
- V. Braitenberg and A. Schüz. *Cortex: statistics and geometry of neuronal connectivity*. Springer 1519  
Science & Business Media, 2013. 1520
- M. Breakspear. Dynamic models of large-scale brain activity. *Nature neuroscience*, 20(3): 1521  
340–352, 2017. 1522

- M. Breakspear, J. A. Roberts, J. R. Terry, S. Rodrigues, N. Mahant, and P. A. Robinson. A unifying explanation of primary generalized seizures through nonlinear brain modeling and bifurcation analysis. *Cerebral Cortex*, 16(9):1296–1313, 2006.
- P. Bucci, A. Mucci, U. Volpe, E. Merlotti, S. Galderisi, and M. Maj. Executive hypercontrol in obsessive–compulsive disorder: electrophysiological and neuropsychological indices. *Clinical neurophysiology*, 115(6):1340–1348, 2004.
- D. M. Buchanan, T. Ros, and R. Nahas. Elevated and slowed eeg oscillations in patients with post-concussive syndrome and chronic pain following a motor vehicle collision. *Brain sciences*, 11(5):537, 2021.
- Á. Byrne, R. D. O’Dea, M. Forrester, J. Ross, and S. Coombes. Next-generation neural mass and field modeling. *Journal of neurophysiology*, 123(2):726–742, 2020.
- R. M. Chapman, J. C. Armington, and H. R. Bragdon. A quantitative survey of kappa and alpha eeg activity. *Electroencephalography and Clinical Neurophysiology*, 14(6):858–868, 1962.
- A. P. Chatzikalymniou, M. Gumus, and F. K. Skinner. Linking minimal and detailed models of cal microcircuits reveals how theta rhythms emerge and their frequencies controlled. *Hippocampus*, 31(9):982–1002, 2021.
- C. C. Chow and Y. Karimipناه. Before and beyond the wilson–cowan equations. *Journal of neurophysiology*, 123(5):1645–1656, 2020.
- K. Clancy, M. Ding, E. Bernat, N. B. Schmidt, and W. Li. Restless ‘rest’: intrinsic sensory hyperactivity and disinhibition in post-traumatic stress disorder. *Brain*, 140(7):2041–2050, 2017.
- F. Cona, M. Lacanna, and M. Ursino. A thalamo-cortical neural mass model for the simulation of brain rhythms during sleep. *Journal of Computational Neuroscience*, 37(1):125–148, 2014.
- B. W. Connors and Y. Amitai. Making waves in the neocortex. *Neuron*, 18(3):347–349, 1997.
- B. J. Cook, A. D. Peterson, W. Woldman, and J. R. Terry. Neural field models: historical perspectives and recent advances. *arXiv preprint arXiv:2103.10554*, 2021.
- S. Coombes and Á. Byrne. Next generation neural mass models. In *Nonlinear dynamics in computational neuroscience*, pages 1–16. Springer, 2019.
- S. Coombes, P. beim Graben, R. Potthast, and J. Wright. *Neural fields: theory and applications*. Springer, 2014.
- G. K. Cooray, R. E. Rosch, and K. J. Friston. Global dynamics of neural mass models. *PLOS Computational Biology*, 19(2):e1010915, 2023.

- J. D. Cowan, J. Neuman, and W. van Drongelen. Wilson–cowan equations for neocortical dynamics. *The Journal of Mathematical Neuroscience*, 6(1):1–24, 2016. 1555  
1556
- O. David and K. J. Friston. A neural mass model for meg/eeg:: coupling and neuronal dynamics. *NeuroImage*, 20(3):1743–1755, 2003. 1557  
1558
- O. David, J. M. Kilner, and K. J. Friston. Mechanisms of evoked and induced responses in meg/eeg. *Neuroimage*, 31(4):1580–1591, 2006. 1559  
1560
- G. Deco, V. K. Jirsa, P. A. Robinson, M. Breakspear, and K. Friston. The dynamic brain: from spiking neurons to neural masses and cortical fields. *PLoS computational biology*, 4(8): e1000092, 2008. 1561  
1562  
1563
- G. Deco, A. Ponce-Alvarez, D. Mantini, G. L. Romani, P. Hagmann, and M. Corbetta. Resting-state functional connectivity emerges from structurally and dynamically shaped slow linear fluctuations. *Journal of Neuroscience*, 33(27):11239–11252, 2013. 1564  
1565  
1566
- N. Dehghani, C. Bédard, S. S. Cash, E. Halgren, and A. Destexhe. Comparative power spectral analysis of simultaneous electroencephalographic and magnetoencephalographic recordings in humans suggests non-resistive extracellular media. *Journal of computational neuroscience*, 29:405–421, 2010. 1567  
1568  
1569  
1570
- M.-P. Deiber, R. Hasler, J. Colin, A. Dayer, J.-M. Aubry, S. Baggio, N. Perroud, and T. Ros. Linking alpha oscillations, attention and inhibitory control in adult adhd with eeg neurofeedback. *NeuroImage: Clinical*, 25:102145, 2020. 1571  
1572  
1573
- N. Deschle, J. Ignacio Gossn, P. Tewarie, B. Schelter, and A. Daffertshofer. On the validity of neural mass models. *Frontiers in computational neuroscience*, page 118, 2021. 1574  
1575
- A. Destexhe and T. J. Sejnowski. The wilson–cowan model, 36 years later. *Biological cybernetics*, 101(1):1–2, 2009. 1576  
1577
- T. Donoghue, M. Haller, E. J. Peterson, P. Varma, P. Sebastian, R. Gao, T. Noto, A. H. Lara, J. D. Wallis, R. T. Knight, et al. Parameterizing neural power spectra into periodic and aperiodic components. *Nature neuroscience*, 23(12):1655–1665, 2020. 1578  
1579  
1580
- S. A. Eichler and J. C. Meier. Ei balance and human diseases-from molecules to networking. *Frontiers in molecular neuroscience*, 1:195, 2008. 1581  
1582
- E. Elhanany and E. L. White. Intrinsic circuitry: synapses involving the local axon collaterals of corticocortical projection neurons in the mouse primary somatosensory cortex. *Journal of Comparative Neurology*, 291(1):43–54, 1990. 1583  
1584  
1585
- G. N. Elston. Specialization of the neocortical pyramidal cell during primate evolution. 2007. 1586

- R. Evertz, D. G. Hicks, and D. T. Liley. Alpha blocking and  $1/f\beta$  spectral scaling in resting eeg can be accounted for by a sum of damped alpha band oscillatory processes. *PLOS Computational Biology*, 18(4):e1010012, 2022. 1587  
1588  
1589
- A. A. Fingelkurts, A. A. Fingelkurts, H. Rytysälä, K. Suominen, E. Isometsä, and S. Kähkönen. Composition of brain oscillations in ongoing eeg during major depression disorder. *Neuroscience research*, 56(2):133–144, 2006. 1590  
1591  
1592
- J. J. Foxe and A. C. Snyder. The role of alpha-band brain oscillations as a sensory suppression mechanism during selective attention. *Frontiers in psychology*, 2:154, 2011. 1593  
1594
- W. J. Freeman. Linear analysis of the dynamics of neural masses. *Annual review of biophysics and bioengineering*, 1(1):225–256, 1972a. 1595  
1596
- W. J. Freeman. Waves, pulses, and the theory of neural masses. *Progress in theoretical biology*, 2(1):1–10, 1972b. 1597  
1598
- W. J. Freeman. *Mass action in the nervous system*, volume 2004. Citeseer, 1975. 1599
- W. J. Freeman. Nonlinear gain mediating cortical stimulus-response relations. *Biological cybernetics*, 33(4):237–247, 1979. 1600  
1601
- W. J. Freeman. Simulation of chaotic eeg patterns with a dynamic model of the olfactory system. *Biological cybernetics*, 56(2-3):139–150, 1987. 1602  
1603
- W. J. Freeman. In E. Başar and T. H. Bullock, editors, *Induced Rhythms of the Brain*. Birkhäuser, Basel, 1991. 1604  
1605
- W. J. Freeman. Tutorial on neurobiology: from single neurons to brain chaos. *International journal of bifurcation and chaos*, 2(03):451–482, 1992. 1606  
1607
- W. J. Freeman, M. D. Holmes, B. C. Burke, and S. Vanhatalo. Spatial spectra of scalp eeg and emg from awake humans. *Clinical Neurophysiology*, 114(6):1053–1068, 2003. 1608  
1609
- R. Gast, D. Rose, C. Salomon, H. E. Möller, N. Weiskopf, and T. R. Knösche. Pyrates—a python framework for rate-based neural simulations. *PloS one*, 14(12):e0225900, 2019. 1610  
1611
- K. Glomb, J. Cabral, A. Cattani, A. Mazzoni, A. Raj, and B. Franceschiello. Computational models in electroencephalography. *Brain topography*, pages 1–20, 2021. 1612  
1613
- J. S. Goldman, N. Tort-Colet, M. Di Volo, E. Susin, J. Bouté, M. Dali, M. Carlu, T.-A. Nghiem, T. Górski, and A. Destexhe. Bridging single neuron dynamics to global brain states. *Frontiers in systems neuroscience*, page 75, 2019. 1614  
1615  
1616
- J. S. Griffith. A field theory of neural nets: I: Derivation of field equations. *The bulletin of mathematical biophysics*, 25:111–120, 1963. 1617  
1618

- J. D. Griffiths, A. R. McIntosh, and J. Lefebvre. A connectome-based, corticothalamic model of state-and stimulation-dependent modulation of rhythmic neural activity and connectivity. *Frontiers in computational neuroscience*, 14:575143, 2020.
- J. D. Griffiths, S. P. Bastiaens, and N. Kaboodvand. Whole-brain modelling: Past, present, and future. In *Computational Modelling of the Brain*, pages 313–355. Springer, 2022.
- F. Grimbert and O. Faugeras. *Analysis of Jansen’s model of a single cortical column*. PhD thesis, INRIA, 2006a.
- F. Grimbert and O. Faugeras. Bifurcation analysis of jansen’s neural mass model. *Neural computation*, 18(12):3052–3068, 2006b.
- S. Haegens, H. Cousijn, G. Wallis, P. J. Harrison, and A. C. Nobre. Inter-and intra-individual variability in alpha peak frequency. *Neuroimage*, 92:46–55, 2014.
- M. Halgren, I. Ulbert, H. Bastuji, D. Fabó, L. Eróss, M. Rey, O. Devinsky, W. K. Doyle, R. Mak-McCully, E. Halgren, et al. The generation and propagation of the human alpha rhythm. *Proceedings of the National Academy of Sciences*, 116(47):23772–23782, 2019.
- A. Hartoyo, P. J. Cadusch, D. T. Liley, and D. G. Hicks. Parameter estimation and identifiability in a neural population model for electro-cortical activity. *PLoS computational biology*, 15(5):e1006694, 2019.
- A. Hartoyo, P. J. Cadusch, D. T. Liley, and D. G. Hicks. Inferring a simple mechanism for alpha-blocking by fitting a neural population model to eeg spectra. *PLoS computational biology*, 16(4):e1007662, 2020.
- E. Hay, S. Hill, F. Schürmann, H. Markram, and I. Segev. Models of neocortical layer 5b pyramidal cells capturing a wide range of dendritic and perisomatic active properties. *PLoS computational biology*, 7(7):e1002107, 2011.
- C.-H. Huang and C.-C. K. Lin. A novel density-based neural mass model for simulating neuronal network dynamics with conductance-based synapses and membrane current adaptation. *Neural Networks*, 143:183–197, 2021.
- S. W. Hughes, M. L. Lőrincz, K. Blethyn, K. A. Kékesi, G. Juhász, M. Turmaine, J. G. Parnavelas, and V. Crunelli. Thalamic gap junctions control local neuronal synchrony and influence macroscopic oscillation amplitude during eeg alpha rhythms. *Frontiers in psychology*, 2:193, 2011.
- E. Iavarone, J. Simko, Y. Shi, M. Bertschy, M. García-Amado, P. Litvak, A.-K. Kaufmann, C. O’Reilly, O. Amsalem, M. Abdellah, et al. Thalamic control of sensory processing and spindles in a biophysical somatosensory thalamoreticular circuit model of wakefulness and sleep. *Cell Reports*, 42(3), 2023.

- G. Ippolito, R. Bertaccini, L. Tarasi, F. Di Gregorio, J. Trajkovic, S. Battaglia, and V. Romei. 1653  
The role of alpha oscillations among the main neuropsychiatric disorders in the adult and 1654  
developing human brain: Evidence from the last 10 years of research. *Biomedicines*, 10(12): 1655  
3189, 2022. 1656
- E. M. Izhikevich. Simple model of spiking neurons. *IEEE Transactions on neural networks*, 14 1657  
(6):1569–1572, 2003. 1658
- E. M. Izhikevich and G. M. Edelman. Large-scale model of mammalian thalamocortical systems. 1659  
*Proceedings of the national academy of sciences*, 105(9):3593–3598, 2008. 1660
- B. H. Jansen and V. G. Rit. Electroencephalogram and visual evoked potential generation in a 1661  
mathematical model of coupled cortical columns. *Biological cybernetics*, 73(4):357–366, 1995. 1662
- B. H. Jansen, G. Zouridakis, and M. E. Brandt. A neurophysiologically-based mathematical 1663  
model of flash visual evoked potentials. *Biological cybernetics*, 68:275–283, 1993. 1664
- O. Jensen and A. Mazaheri. Shaping functional architecture by oscillatory alpha activity: 1665  
gating by inhibition. *Frontiers in human neuroscience*, 4:186, 2010. 1666
- V. K. Jirsa and H. Haken. Field theory of electromagnetic brain activity. *Physical review 1667  
letters*, 77(5):960, 1996. 1668
- P. R. Johnston, A. R. McIntosh, and J. A. Meltzer. Spectral slowing in chronic stroke reflects 1669  
abnormalities in both periodic and aperiodic neural dynamics. *NeuroImage: Clinical*, 37: 1670  
103277, 2023. 1671
- S. R. Jones, D. L. Pritchett, M. A. Sikora, S. M. Stufflebeam, M. Hämäläinen, and C. I. Moore. 1672  
Quantitative analysis and biophysically realistic neural modeling of the meg mu rhythm: 1673  
rhythmogenesis and modulation of sensory-evoked responses. *Journal of neurophysiology*, 1674  
102(6):3554–3572, 2009. 1675
- E. R. Kandel, J. H. Schwartz, T. M. Jessell, S. Siegelbaum, A. J. Hudspeth, S. Mack, et al. 1676  
*Principles of neural science*, volume 4. McGraw-hill New York, 2000. 1677
- F. Karadag, N. K. Oguzhanoglu, T. Kurt, A. Oguzhanoglu, F. Atesci, and O. Özdel. Quanti- 1678  
tative eeg analysis in obsessive compulsive disorder. *International journal of neuroscience*, 1679  
113(6):833–847, 2003. 1680
- R. Katznelson. Normal modes of the brain: neuroanatomical basis and a physiological theoret- 1681  
ical model. *Electric fields of the brain: The neurophysics of EEG*, 1:401–442, 1981. 1682
- C. C. Kerr, C. J. Rennie, and P. A. Robinson. Physiology-based modeling of cortical auditory 1683  
evoked potentials. *Biological cybernetics*, 98:171–184, 2008. 1684
- A. A. Kiani, T. I. Netoff, and G. M. Ghose. Realistic alpha oscillations and transient responses 1685  
in a cortical microcircuit model. *bioRxiv*, pages 2021–11, 2021. 1686

- Z. P. Kilpatrick. *Wilson-Cowan Model*, pages 1–5. Springer New York, New York, NY, 2013. 1687  
ISBN 978-1-4614-7320-6. doi: 10.1007/978-1-4614-7320-6\_80-1. URL [https://doi.org/10.1007/978-1-4614-7320-6\\_80-1](https://doi.org/10.1007/978-1-4614-7320-6_80-1). 1688  
1689
- W. Klimesch. Eeg alpha and theta oscillations reflect cognitive and memory performance: a 1690  
review and analysis. *Brain research reviews*, 29(2-3):169–195, 1999. 1691
- W. Klimesch. Alpha-band oscillations, attention, and controlled access to stored information. 1692  
*Trends in cognitive sciences*, 16(12):606–617, 2012. 1693
- T. R. Knösche. *Jansen-Rit Model*, pages 1463–1466. Springer New York, New York, NY, 2015. 1694  
ISBN 978-1-4614-6675-8. doi: 10.1007/978-1-4614-6675-8\_65. URL [https://doi.org/10.1007/978-1-4614-6675-8\\_65](https://doi.org/10.1007/978-1-4614-6675-8_65). 1695  
1696
- A. U. Larkman. Dendritic morphology of pyramidal neurones of the visual cortex of the rat: 1697  
Iii. spine distributions. *Journal of comparative neurology*, 306(2):332–343, 1991. 1698
- G. Li, L.-M. Hsu, Y. Wu, A. C. Bozoki, Y.-Y. I. Shih, and P.-T. Yap. Excitation-inhibition 1699  
imbalance in alzheimer’s disease using multiscale neural model inversion of resting-state fmri. 1700  
*medRxiv*, pages 2022–10, 2022. 1701
- D. T. Liley and J. J. Wright. Intracortical connectivity of pyramidal and stellate cells: estimates 1702  
of synaptic densities and coupling symmetry. *Network: Computation in Neural Systems*, 5 1703  
(2):175–189, 1994. 1704
- D. T. Liley, P. J. Cadusch, and J. J. Wright. A continuum theory of electro-cortical activity. 1705  
*Neurocomputing*, 26:795–800, 1999. 1706
- D. T. Liley, P. J. Cadusch, and M. P. Dafilis. A spatially continuous mean field theory of 1707  
electrocortical activity. *Network: Computation in Neural Systems*, 13(1):67, 2001. 1708
- X.-B. Liu, Z.-H. Zheng, M.-C. Xi, and C.-P. Wu. Distribution of synapses on an intracellularly 1709  
labeled small pyramidal neuron in the cat motor cortex. *Anatomy and embryology*, 184: 1710  
313–318, 1991. 1711
- F. Lopes da Silva. Neural mechanisms underlying brain waves: from neural membranes to 1712  
networks. *Electroencephalography and clinical neurophysiology*, 79(2):81–93, 1991. 1713
- F. Lopes da Silva. Dynamics of eegs as signals of neuronal populations: models and theoretical 1714  
considerations. *Electroencephalography: Basic Principles, Clinical Applications and Related 1715  
Fields, 4th edition*, pages 76–92, 1998. 1716
- F. Lopes da Silva and W. S. Van Leeuwen. The cortical source of the alpha rhythm. *Neuro- 1717  
science letters*, 6(2-3):237–241, 1977. 1718
- F. Lopes da Silva, A. Hoeks, H. Smits, and L. Zetterberg. Model of brain rhythmic activity. 1719  
*Kybernetik*, 15(1):27–37, 1974. 1720

- F. Lopes da Silva, A. Van Rotterdam, P. Barts, E. Van Heusden, and W. Burr. Models of neuronal populations: the basic mechanisms of rhythmicity. *Progress in brain research*, 45: 281–308, 1976.
- M. L. Lőrincz, K. A. Kékesi, G. Juhász, V. Crunelli, and S. W. Hughes. Temporal framing of thalamic relay-mode firing by phasic inhibition during the alpha rhythm. *Neuron*, 63(5): 683–696, 2009.
- E. Louis, L. Frey, J. Britton, L. Frey, J. Hopp, P. Korb, M. Koubeissi, W. Lievens, E. Pestana-Knight, and E. Louis. Appendix 1. the scientific basis of eeg: Neurophysiology of eeg generation in the brain. *Electroencephalography (EEG): An Introductory Text and Atlas of Normal and Abnormal Findings in Adults, Children, and Infants*, 2016.
- D. Lozano-Soldevilla. On the physiological modulation and potential mechanisms underlying parieto-occipital alpha oscillations. *Frontiers in computational neuroscience*, 12:23, 2018.
- A. C. Marreiros, J. Daunizeau, S. J. Kiebel, and K. J. Friston. Population dynamics: variance and the sigmoid activation function. *Neuroimage*, 42(1):147–157, 2008.
- A. C. Marreiros, S. J. Kiebel, and K. J. Friston. A dynamic causal model study of neuronal population dynamics. *Neuroimage*, 51(1):91–101, 2010.
- F. Mazza, T. A. Valiante, J. D. Griffiths, and E. Hay. In-silico eeg biomarkers of reduced inhibition in human cortical microcircuits in depression. *bioRxiv*, pages 2021–07, 2022.
- C. Meisel, K. Bailey, P. Achermann, and D. Plenz. Decline of long-range temporal correlations in the human brain during sustained wakefulness. *Scientific reports*, 7(1):11825, 2017.
- L. J. Metzger, S. R. Paige, M. A. Carson, N. B. Lasko, L. A. Paulus, R. K. Pitman, and S. P. Orr. Ptsd arousal and depression symptoms associated with increased right-sided parietal eeg asymmetry. *Journal of abnormal psychology*, 113(2):324, 2004.
- J. Moini and P. Piran. Chapter 6 - cerebral cortex. In J. Moini and P. Piran, editors, *Functional and Clinical Neuroanatomy*, pages 177–240. Academic Press, 2020. ISBN 978-0-12-817424-1. doi: <https://doi.org/10.1016/B978-0-12-817424-1.00006-9>.
- D. Momi, Z. Wang, and J. D. Griffiths. Tms-evoked responses are driven by recurrent large-scale network dynamics. *Elife*, 12, 2023.
- R. J. Moran, S. J. Kiebel, K. E. Stephan, R. Reilly, J. Daunizeau, and K. J. Friston. A neural mass model of spectral responses in electrophysiology. *NeuroImage*, 37(3):706–720, 2007.
- R. J. Moran, M. Symmonds, K. E. Stephan, K. J. Friston, and R. J. Dolan. An in vivo assay of synaptic function mediating human cognition. *Current Biology*, 21(15):1320–1325, 2011.



- E. J. Müller, S. J. van Albada, J. Kim, and P. A. Robinson. Unified neural field theory of brain dynamics underlying oscillations in parkinson's disease and generalized epilepsies. *Journal of theoretical biology*, 428:132–146, 2017.
- J. D. Murray, A. Anticevic, M. Gancsos, M. Ichinose, P. R. Corlett, J. H. Krystal, and X.-J. Wang. Linking microcircuit dysfunction to cognitive impairment: effects of disinhibition associated with schizophrenia in a cortical working memory model. *Cerebral cortex*, 24(4): 859–872, 2014.
- S. D. Muthukumaraswamy and D. T. Liley. 1/f electrophysiological spectra in resting and drug-induced states can be explained by the dynamics of multiple oscillatory relaxation processes. *NeuroImage*, 179:582–595, 2018.
- T. T. Nakagawa, M. Woolrich, H. Luckhoo, M. Joensson, H. Mohseni, M. L. Kringelbach, V. Jirsa, and G. Deco. How delays matter in an oscillatory whole-brain spiking-neuron network model for meg alpha-rhythms at rest. *Neuroimage*, 87:383–394, 2014.
- S. A. Neymotin, D. S. Daniels, B. Caldwell, R. A. McDougal, N. T. Carnevale, M. Jas, C. I. Moore, M. L. Hines, M. Hämmäläinen, and S. R. Jones. Human neocortical neurosolver (hnn), a new software tool for interpreting the cellular and network origin of human meg/eeg data. *Elife*, 9:e51214, 2020.
- E. Niedermeyer et al. The normal eeg of the waking adult. *Electroencephalography: Basic principles, clinical applications, and related fields*, 167:155–164, 2005.
- P. L. Nunez. The brain wave equation: a model for the eeg. *Mathematical Biosciences*, 21(3-4): 279–297, 1974.
- P. L. Nunez and B. A. Cutillo. *Neocortical dynamics and human EEG rhythms*. Oxford University Press, USA, 1995.
- P. L. Nunez and R. Srinivasan. A theoretical basis for standing and traveling brain waves measured with human eeg with implications for an integrated consciousness. *Clinical neurophysiology*, 117(11):2424–2435, 2006.
- P. L. Nunez, R. Srinivasan, et al. *Electric fields of the brain: the neurophysics of EEG*. Oxford University Press, USA, 2006.
- D. Pinotsis, P. Robinson, P. beim Graben, and K. Friston. Neural masses and fields: modeling the dynamics of brain activity, 2014.
- J. Pronold, A. van Meegen, H. Vollenbroeker, R. Shimoura, M. Senden, C. Hilgetag, R. Bakker, and S. van Albada. Multi-scale spiking network model of human cerebral cortex. *bioRxiv*, pages 2023–03, 2023.

- A. Raj, C. Cai, X. Xie, E. Palacios, J. Owen, P. Mukherjee, and S. Nagarajan. Spectral graph theory of brain oscillations. *Human brain mapping*, 41(11):2980–2998, 2020. 1786  
1787
- W. Rall. Electrophysiology of a dendritic neuron model. *Biophysical journal*, 2(2 Pt 2):145, 1962. 1788  
1789
- W. Rall. Theoretical significance of dendritic trees for neuronal input-output relations. *Neural theory and modeling*, 1964. 1790  
1791
- W. Rall. Distinguishing theoretical synaptic potentials computed for different soma-dendritic distributions of synaptic input. *Journal of neurophysiology*, 30(5):1138–1168, 1967. 1792  
1793
- C. J. Rennie, P. A. Robinson, and J. J. Wright. Effects of local feedback on dispersion of electrical waves in the cerebral cortex. *Physical Review E*, 59(3):3320, 1999. 1794  
1795
- J. Roberts and P. Robinson. Corticothalamic dynamics: structure of parameter space, spectra, instabilities, and reduced model. *Physical Review E*, 85(1):011910, 2012. 1796  
1797
- J. A. Roberts and P. A. Robinson. Modeling absence seizure dynamics: implications for basic mechanisms and measurement of thalamocortical and corticothalamic latencies. *Journal of theoretical biology*, 253(1):189–201, 2008. 1798  
1800
- P. Robinson. Determination of effective brain connectivity from functional connectivity using propagator-based interferometry and neural field theory with application to the corticothalamic system. *Physical Review E*, 90(4):042712, 2014. 1801  
1802  
1803
- P. Robinson, C. Rennie, and D. Rowe. Dynamics of large-scale brain activity in normal arousal states and epileptic seizures. *Physical Review E*, 65(4):041924, 2002. 1804  
1805
- P. A. Robinson, C. J. Rennie, and J. J. Wright. Propagation and stability of waves of electrical activity in the cerebral cortex. *Physical Review E*, 56(1):826, 1997. 1806  
1807
- P. A. Robinson, C. J. Rennie, J. J. Wright, H. Bahramali, E. Gordon, and D. L. Rowe. Prediction of electroencephalographic spectra from neurophysiology. *Physical Review E*, 63(2):021903, 2001. 1808  
1809  
1810
- P. A. Robinson, C. J. Rennie, D. L. Rowe, S. C. O’Connor, J. J. Wright, E. Gordon, and R. W. Whitehouse. Neurophysical modeling of brain dynamics. *Neuropsychopharmacology*, 28(1):S74–S79, 2003. 1811  
1812  
1813
- P. A. Robinson, C. J. Rennie, D. L. Rowe, and S. C. O’Connor. Estimation of multiscale neurophysiologic parameters by electroencephalographic means. *Human brain mapping*, 23(1):53–72, 2004. 1814  
1815  
1816
- P. A. Robinson, C. Rennie, D. L. Rowe, S. O’Connor, Gordon, and E. Multiscale brain modelling. *Philosophical Transactions of the Royal Society B: Biological Sciences*, 360(1457):1043–1050, 2005. 1817  
1818  
1819

- M. Roohi-Azizi, L. Azimi, S. Heysieattalab, and M. Aamidfar. Changes of the brain's bioelectrical activity in cognition, consciousness, and some mental disorders. *Medical journal of the Islamic Republic of Iran*, 31:53, 2017. 1820-1822
- D. L. Rowe, P. A. Robinson, and C. J. Rennie. Estimation of neurophysiological parameters from the waking eeg using a biophysical model of brain dynamics. *Journal of theoretical biology*, 231(3):413–433, 2004. 1823-1825
- Y. B. Saalman, M. A. Pinsk, L. Wang, X. Li, and S. Kastner. The pulvinar regulates information transmission between cortical areas based on attention demands. *science*, 337(6095):753–756, 2012. 1826-1828
- J. Samaha and B. R. Postle. The speed of alpha-band oscillations predicts the temporal resolution of visual perception. *Current Biology*, 25(22):2985–2990, 2015. 1829-1830
- P. Sanz-Leon and P. Robinson. Multistability in the corticothalamic system. *Journal of Theoretical Biology*, 432:141–156, 2017. 1831-1832
- P. Sanz-Leon, S. A. Knock, A. Spiegler, and V. K. Jirsa. Mathematical framework for large-scale brain network modeling in the virtual brain. *Neuroimage*, 111:385–430, 2015. 1833-1834
- B. Scally, M. R. Burke, D. Bunce, and J.-F. Delvenne. Resting-state eeg power and connectivity are associated with alpha peak frequency slowing in healthy aging. *Neurobiology of aging*, 71:149–155, 2018. 1835-1837
- M. Schirner, A. R. McIntosh, V. Jirsa, G. Deco, and P. Ritter. Inferring multi-scale neural mechanisms with brain network modelling. *Elife*, 7:e28927, 2018. 1838-1839
- V. S. Sohal and J. L. Rubenstein. Excitation-inhibition balance as a framework for investigating mechanisms in neuropsychiatric disorders. *Molecular psychiatry*, 24(9):1248–1257, 2019. 1840-1841
- J.-L. Song, L. Paixao, Q. Li, S.-H. Li, R. Zhang, and M. B. Westover. A novel neural computational model of generalized periodic discharges in acute hepatic encephalopathy. *Journal of computational neuroscience*, 47(2):109–124, 2019. 1842-1844
- R. C. Sotero, N. J. Trujillo-Barreto, Y. Iturria-Medina, F. Carbonell, and J. C. Jimenez. Realistically coupled neural mass models can generate eeg rhythms. *Neural computation*, 19(2):478–512, 2007. 1845-1847
- A. Spiegler. *Dynamics of biologically informed neural mass models of the brain*. PhD thesis, Universitätsbibliothek Ilmenau, 2012. 1848-1849
- L. Stefanovski, P. Triebkorn, A. Spiegler, M.-A. Diaz-Cortes, A. Solodkin, V. Jirsa, A. R. McIntosh, P. Ritter, and A. D. N. Initiative. Linking molecular pathways and large-scale computational modeling to assess candidate disease mechanisms and pharmacodynamics in alzheimer's disease. *Frontiers in computational neuroscience*, 13:54, 2019. 1850-1853

- M. Steriade. Cellular substrates of brain rhythms. *Electroencephalography: Basic principles, clinical applications, and related fields*, 5:31–83, 2005. 1854  
1855
- A. A. Studenova, A. Villringer, and V. V. Nikulin. Non-zero mean alpha oscillations revealed with computational model and empirical data. *PLoS computational biology*, 18(7):e1010272, 2022. 1856  
1858
- H. Taher. *Next generation neural mass models: working memory, all-brain modelling and multi-timescale phenomena*. PhD thesis, Université Côte d’Azur, 2021. 1859  
1860
- M. Tudor, L. Tudor, and K. I. Tudor. Hans berger (1873-1941)—the history of electroencephalography. *Acta medica Croatica: casopis Hrvatske akademije medicinskih znanosti*, 59(4):307–313, 2005. 1861  
1862  
1863
- K. Türker and R. Powers. Black box revisited: a technique for estimating postsynaptic potentials in neurons. *Trends in neurosciences*, 28(7):379–386, 2005. 1864  
1865
- P. A. Valdés-Hernández, A. Ojeda-González, E. Martínez-Montes, A. Lage-Castellanos, T. Virués-Alba, L. Valdés-Urrutia, and P. A. Valdes-Sosa. White matter architecture rather than cortical surface area correlates with the eeg alpha rhythm. *Neuroimage*, 49(3):2328–2339, 2010. 1866  
1867  
1868  
1869
- S. Van Albada, C. Kerr, A. Chiang, C. Rennie, and P. Robinson. Neurophysiological changes with age probed by inverse modeling of eeg spectra. *Clinical neurophysiology*, 121(1):21–38, 2010. 1870  
1871  
1872
- A. van Rotterdam, F. Lopes da Silva, J. Van den Ende, M. Viergever, and A. Hermans. A model of the spatial-temporal characteristics of the alpha rhythm. *Bulletin of mathematical biology*, 44(2):283–305, 1982. 1873  
1874  
1875
- P. Verma, S. Nagarajan, and A. Raj. Spectral graph theory of brain oscillations—revisited and improved. *NeuroImage*, 249:118919, 2022. 1876  
1877
- P. Virtanen, R. Gommers, T. E. Oliphant, M. Haberland, T. Reddy, D. Cournapeau, E. Burovski, P. Peterson, W. Weckesser, J. Bright, S. J. van der Walt, M. Brett, J. Wilson, K. J. Millman, N. Mayorov, A. R. J. Nelson, E. Jones, R. Kern, E. Larson, C. J. Carey, Í. Polat, Y. Feng, E. W. Moore, J. VanderPlas, D. Laxalde, J. Perktold, R. Cimrman, I. Henriksen, E. A. Quintero, C. R. Harris, A. M. Archibald, A. H. Ribeiro, F. Pedregosa, P. van Mulbregt, and SciPy 1.0 Contributors. SciPy 1.0: Fundamental Algorithms for Scientific Computing in Python. *Nature Methods*, 17:261–272, 2020. doi: 10.1038/s41592-019-0686-2. 1878  
1879  
1880  
1881  
1882  
1883  
1884
- B. Voytek, M. A. Kramer, J. Case, K. Q. Lepage, Z. R. Tempesta, R. T. Knight, and A. Gazdaley. Age-related changes in 1/f neural electrophysiological noise. *Journal of Neuroscience*, 35(38):13257–13265, 2015. 1885  
1886  
1887

- F. Wendling, J.-J. Bellanger, F. Bartolomei, and P. Chauvel. Relevance of nonlinear lumped-parameter models in the analysis of depth-eeg epileptic signals. *Biological cybernetics*, 83(4): 367–378, 2000. 1888  
1889  
1890
- E. Wianda and B. Ross. The roles of alpha oscillation in working memory retention. *Brain and behavior*, 9(4):e01263, 2019. 1891  
1892
- H. R. Wilson and J. D. Cowan. Excitatory and inhibitory interactions in localized populations of model neurons. *Biophysical journal*, 12(1):1–24, 1972. 1893  
1894
- J. Wright and D. Liley. Dynamics of the brain at global and microscopic scales: Neural networks and the eeg. *Behavioral and Brain Sciences*, 19(2):285–295, 1996. 1895  
1896
- J. J. Wright and D. T. Liley. Simulation of electrocortical waves. *Biological cybernetics*, 72: 347–356, 1995. 1897  
1898
- H. K. Yao, A. Guet-McCreight, F. Mazza, H. M. Chameh, T. D. Prevot, J. D. Griffiths, S. J. Tripathy, T. A. Valiante, E. Sibille, and E. Hay. Reduced inhibition in depression impairs stimulus processing in human cortical microcircuits. *Cell Reports*, 38(2):110232, 2022. 1899  
1900  
1901
- M. Zavaglia, L. Astolfi, F. Babiloni, and M. Ursino. A neural mass model for the simulation of cortical activity estimated from high resolution eeg during cognitive or motor tasks. *Journal of neuroscience methods*, 157(2):317–329, 2006. 1902  
1903  
1904
- L. H. Zetterberg, L. Kristiansson, and K. Mossberg. Performance of a model for a local neuron population. *Biological cybernetics*, 31(1):15–26, 1978. 1905  
1906
- X. Zhao and P. A. Robinson. Generalized seizures in a neural field model with bursting dynamics. *Journal of computational neuroscience*, 39(2):197–216, 2015. 1907  
1908
- X. Zhao, J. Kim, and P. Robinson. Slow-wave oscillations in a corticothalamic model of sleep and wake. *Journal of theoretical biology*, 370:93–102, 2015. 1909  
1910
- S. Zhou and Y. Yu. Synaptic ei balance underlies efficient neural coding. *Frontiers in Neuroscience*, 12:46, 2018. 1911  
1912

## Supplementary Information

1913

In the following, we provide additional information on various technical details and additional analyses from our study, which were not included in the main text primarily due to space reasons. These pages cover the derivation of the JR model differential equations (Section S1), the comparison of connectivity parameter spaces between JR and MDF (Section S2), the phase plane analysis of JR (Section S3), the reduced 3D parameter space of MDF (Section S4), the 4D JR connectivity analyses (Section S5), and finally, the full model equations with a description of their parameters and standard alpha values (Section S6). Note that complete code for the generating figures in the following and in the main text is openly available at [github.com/griffithslab/Bastiaens2024\\_AlpaModels](https://github.com/griffithslab/Bastiaens2024_AlpaModels).

1914  
1915  
1916  
1917  
1918  
1919  
1920  
1921  
1922

## S.1 Derivation of the JR Model Equations

1923

The Jansen-Rit and related models are often discussed in terms of a convolution integral for the synaptic impulse response function, as well as the corresponding equivalent second-order differential equation, which is typically what is actually used in numerical simulations. The mathematical relationship between these is however rarely given in literature sources, and so we provide that here, with a full derivation of the JR differential equation from its impulse response, using the Laplace transform as it simplifies convolution operations by turning them into algebraic manipulations in the Laplace domain.

1924

1925

1926

1927

1928

1929

1930

The synaptic impulse response is defined as an alpha function, which is described by the following equations:

1932

$$h(t) = \begin{cases} \alpha\beta t e^{-\beta t}, & t \geq 0 \\ 0 & \text{otherwise} \end{cases} \quad (25)$$

with  $\alpha$  as the maximum amplitude of the PSP and  $\beta$  the rate constant parameter. The first step consists of finding the Laplace transform of  $h(t)$ , denoted as  $H(s)$ , which is defined as follows:

1933

1934

1935

$$H(s) = \mathcal{L}\{h(t)\} = \int_0^{\infty} h(t)e^{-st} dt \quad (26)$$

$$= \int_0^{\infty} \alpha\beta t e^{-\beta t} e^{-st} dt \quad (27)$$

$$= \int_0^{\infty} \alpha\beta t e^{(-\beta-s)t} dt \quad (28)$$

$$= \lim_{b \rightarrow \infty} \left[ \int_0^b \alpha\beta t e^{(-\beta-s)t} dt \right] \quad (29)$$

$$= \lim_{b \rightarrow \infty} \left( \left[ \alpha\beta t \frac{1}{-\beta-s} e^{(-\beta-s)t} \right]_0^b - \int_0^b \frac{\alpha\beta}{-\beta-s} e^{(-\beta-s)t} dt \right) \quad (30)$$

$$= \frac{\alpha\beta}{-\beta-s} \lim_{b \rightarrow \infty} \left( b e^{(-\beta-s)b} - \int_0^b e^{(-\beta-s)t} dt \right) \quad (31)$$

$$= \frac{\alpha\beta}{\beta+s} \lim_{b \rightarrow \infty} \int_0^b e^{(-\beta-s)t} dt \quad (32)$$

$$= \frac{\alpha\beta}{\beta+s} \lim_{b \rightarrow \infty} \left[ \frac{1}{-\beta-s} e^{(-\beta-s)t} \right]_0^b \quad (33)$$

$$= \frac{\alpha\beta}{(\beta+s)^2} \lim_{b \rightarrow \infty} [1 - e^{(-\beta-s)b}] \quad (34)$$

$$= \frac{\alpha\beta}{(\beta+s)^2} \quad (35)$$

Now, with an expression for  $H(s)$  in the Laplace domain, and given that  $y(t)$  is equal to

1936

the convolution of  $h(t)$  and  $x(t)$ , we can represent this relationship in the Laplace domain as: 1937

$$Y(s) = X(s)H(s) \quad (36)$$

$$Y(s) = X(s)\frac{\alpha\beta}{(\beta + s)^2} \quad (37)$$

$$(\beta + s)^2Y(s) = X(s)\alpha\beta \quad (38)$$

$$s^2Y(s) + \beta^2Y(s) + 2\beta sY(s) = \alpha\beta X(s) \quad (39)$$

$$s^2Y(s) = \alpha\beta X(s) - 2\beta sY(s) - \beta^2Y(s) \quad (40)$$

Since  $s^2Y(s)$  corresponds to the second derivative in the time domain, translating equation (40) 1938  
back into the time domain, we obtain: 1939

$$\ddot{y}(t) = \alpha\beta x(t) - 2\beta\dot{y}(t) - \beta^2y(t) \quad (41)$$

This corresponds to the commonly used Jansen and Rit second-order differential equation, 1940  
which can be rewritten in the form of two first-order ODE's: 1941

$$\dot{y}(t) = z(t) \quad (42)$$

$$\dot{z}(t) = \alpha\beta x(t) - 2\beta z(t) - \beta^2y(t) \quad (43)$$

with  $y(t)$  representing the average postsynaptic membrane potential (output of the PSP block). 1942



## S.2 Comparison of MDF and JR connectivity parameter spaces

1943

By setting the parameters to be the same between JR and MDF, we compare the connectivity parameter space of the two models (Fig. 15).

1944  
1945

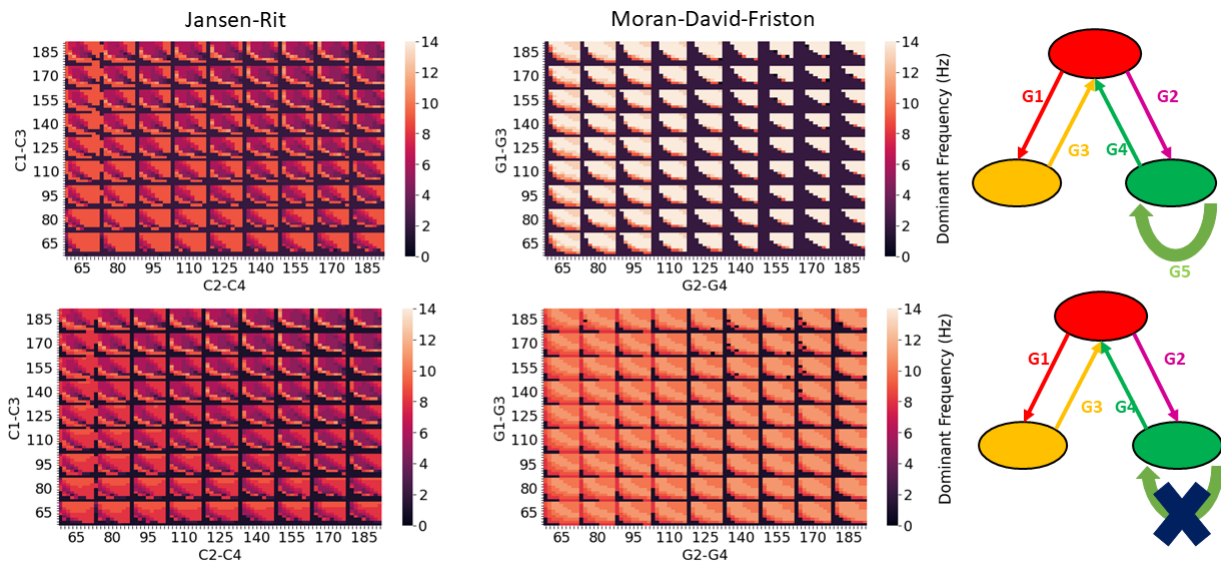

**Figure S1.** *Connection strength parameter spaces for JR and MDF with similar parameter settings.* In the top, for MDF  $\gamma_5 = 16$ , and at the bottom  $\gamma_5 = 0$ . The general shape of the dynamics is very similar between the two, suggesting that the effects of connectivity are the same. However, MDF tends to generate oscillations of higher frequencies for identical connectivity parameter sets, even when the  $\gamma_5$  connection is removed.

In the top row of Fig. 15, we compare JR against MDF with the self-inhibitory connection. We observe a similar triangular boundary shape within which the system oscillates. However, MDF tends to oscillate at higher frequency that exceed the alpha range (Fig. 15, MDF top row, colors are brighter than JR). When the self-inhibitory connection is removed in MDF (Fig. 15, MDF bottom row), the system now oscillates at the alpha frequency. It does not present lower frequencies, such as those in the JR model where we have slower oscillations. Thus, MDF seems to oscillate at higher frequencies than JR. Nonetheless, we observe that the two models share this similar triangular shape with non-oscillatory behavior when  $C_3$  and  $C_4$  are too low, suggesting similar global dynamics. The main conclusion drawn from this analysis is that the self-inhibitory connection introduced in MDF grants the model the ability to generate oscillations at a higher frequency than alpha, a more challenging capability compared to JR.

1946

1947

1948

1949

1950

1951

1952

1953

1954

1955

1956

### S.3 Phase plane of JR in 3D

1957

For the stability analyses in Fig. 12, we have only presented the phase plane with the pyramidal and inhibitory population output voltages. Considering the trajectory of the third excitatory neural population activity alongside these can provide a better understanding of the full picture however, as can be seen in Fig. 16.

1958  
1959  
1960  
1961

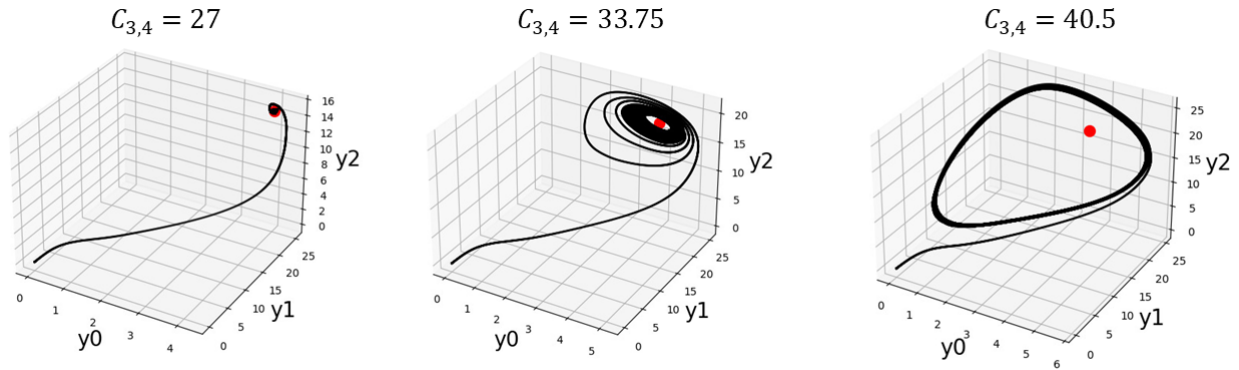

**Figure S2. Phase plane of JR for different E-I connectivity parameters.** The trajectory of the three neural populations (with  $y_0$ ,  $y_1$ , and  $y_2$  corresponding to the output of the PSP block for the pyramidal cells, excitatory interneurons, and inhibitory interneurons, respectively) can be inferred by examining the stability of their respective fixed point (red). When  $C_{3,4} = 27$ , the fixed point is stable and no oscillations occur. For  $C_{3,4} = 33.5$ , the system enters a limit cycle with the oscillation frequency of  $\alpha$ . Finally, when  $C_{3,4} = 40.5$ , the limit cycle widens and the frequency of oscillation is reduced.

As seen in our previous phase plane analysis, for specific connectivity parameters, the system either reaches a fixed point or enters a limit cycle defining the frequency of oscillation. The results closely resemble those in Fig. 12, 1b, implying that the dynamics primarily involve interactions between the pyramidal and inhibitory populations, with minimal contribution from the third population in this case..

1962  
1963  
1964  
1965  
1966

## S.4 3D parameter space with MDF

1967

We simplified the 5-dimensional connection parameter space into a 3-dimensional representation 1968  
for the MDF model, using its linearized version. Stability is assessed by looking at the system's 1969  
poles within the transfer function of the system. The aim was to establish a parallel with the 1970  
3D 'xyz' corticocortical/corticothalamic/intrathalamic lumped gains reduced parameter space 1971  
discussed in a number of studies using the RRW model (although for reasons of space we have 1972  
not focused on that aspect of RRW in the present paper Robinson et al., 2002, 2005; Roberts 1973  
and Robinson, 2012; Breakspear et al., 2006; Abeysuriya et al., 2015), and determine the effects 1974  
of the loops on the dynamics of the MDF model. 1975

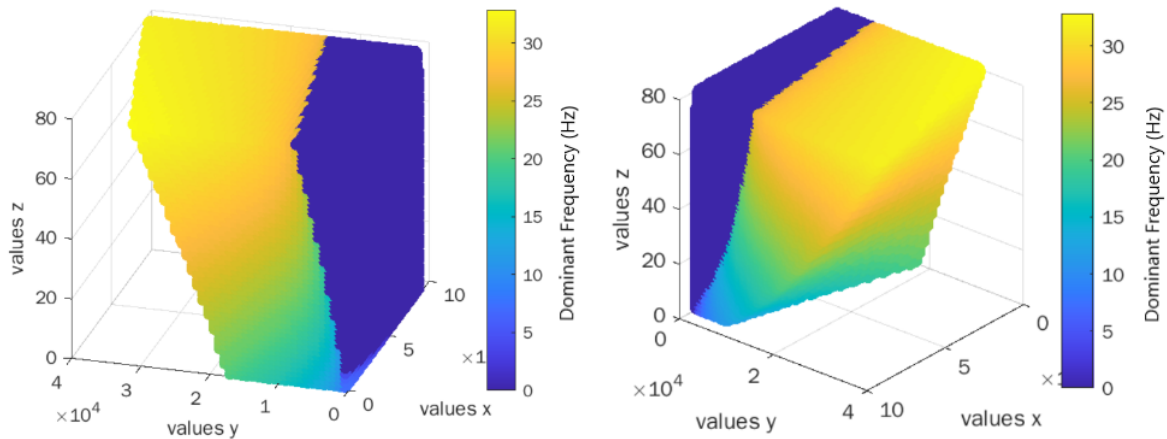

**Figure S3.** *Visualization of dynamical regimes of the MDF model in a 3D setting using the linearized expression.* The x-axis corresponds to effect of the excitatory loop ( $\gamma_1 * \gamma_2$ ); the y-axis represents the effect of the inhibitory loop ( $\gamma_3 * \gamma_4$ ); and the z-axis is the effect of the self-inhibitory loop ( $\gamma_5$ ). As  $\gamma_5$  values increase, the system tends to oscillate at a higher frequency.

The aim here is to easily visualize the regions of stability and dynamics as a function of 1976  
the 'loops', rather than a single connectivity parameter. As expected, with the increase in the 1977  
self-inhibitory connection (z-axis), the dominant frequency of oscillation gradually shifts from 1978  
theta to alpha and then to the beta range. 1979

## S.5 4D JR connectivity analysis

1980

In the JR model, our focus was specifically on  $C_3$  ( $P \rightarrow I$ ) and  $C_4$  ( $I \rightarrow P$ ) as the E-I loop, but there is also the interaction between excitatory interneurons and pyramidal cells ( $C_1$  ( $P \rightarrow E$ ) and  $C_2$  ( $E \rightarrow P$ )) to consider. Typically, the ratio between these values is varied. By simulating time series for different values of  $C$  with the standard ratio values ( $C_1 = C$ ,  $C_2 = 0.8 * C$ ,  $C_3 = 0.25 * C$  and  $C_4 = 0.25 * C$ ), we can infer that increasing values of  $C$  lead to a decrease in the frequency of oscillation up to a certain point (Fig. 18), which concurs with results from Jansen and Rit (1995).

1987

1988

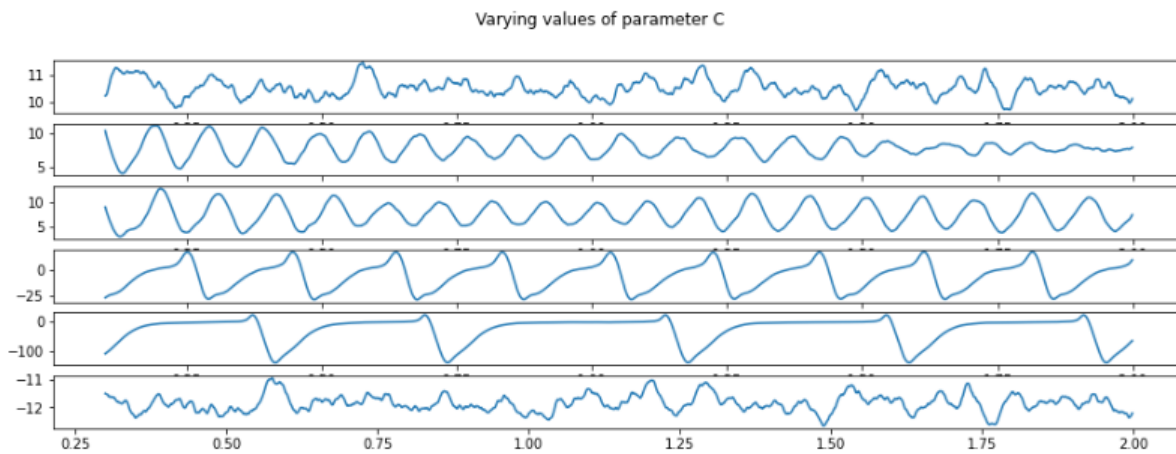

**Figure S4. Simulated time series of JR for different connectivity  $C$  values.** From top to bottom:  $C = 68$ ,  $C = 128$ ,  $C = 135$ ,  $C = 270$ ,  $C = 675$ ,  $C = 1350$ . As connectivity values increase, the frequency of oscillations decreases up to  $C = 675$ .

Changes in the frequency of oscillation as a function of connectivity ratios are presented in the form of 4D heatmaps in a 2D space (Figure 19). The general trend observed is that higher connectivity values result in slower oscillations, as expected.

1989

1990

1991

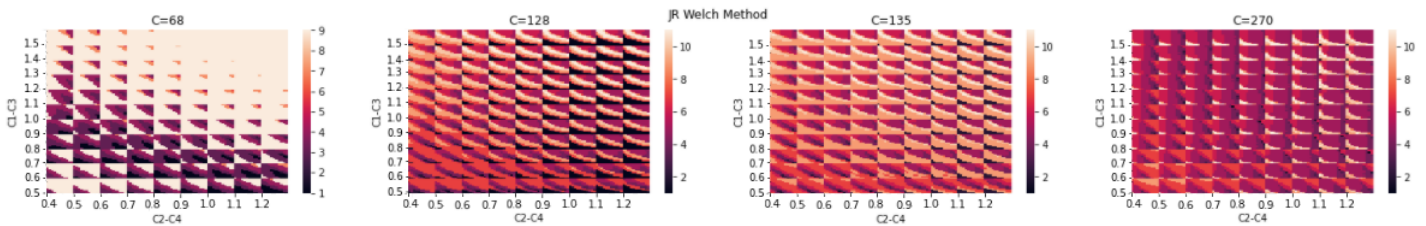

**Figure S5. Variation in the frequency of oscillation as a function of connection strength for JR for different  $C$  values.** From left to right:  $C = 68$ ,  $C = 128$ ,  $C = 135$  and  $C = 270$ . The outer axes  $C_1 - C_2$  represent the excitatory loop, while the inner axes  $C_3 - C_4$  represent the inhibitory loop. The results correlate with what is observed in the time series. The parameter space is obtained by changing the ratio of each connection (i.e:  $C_1 = 0.8$  corresponds to  $C_1 = 0.8 * C$ )

To observe the different trends that emerge, we focused on the case where  $C$  equals 135 and investigated the different possible combinations of parameters on the outer and inner axes (Figure 20).

1992

1993

1994

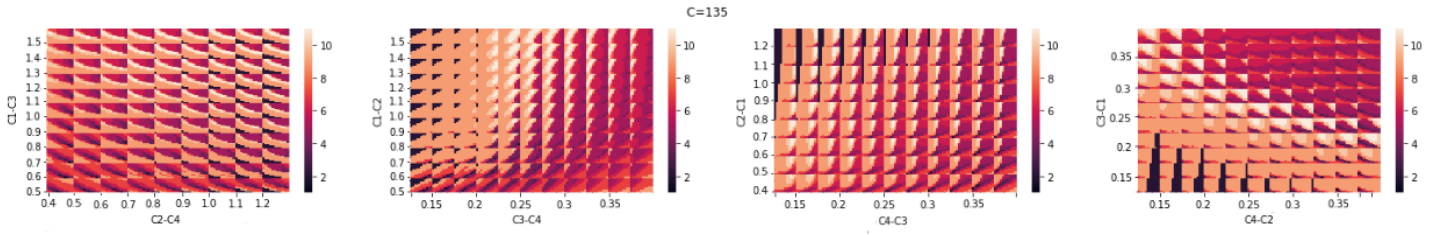

**Figure S6. Connection strength parameter spaces for Jansen-Rit in different combinations with  $C=135$ .** Each combination reveals a distinct pattern, aiding in visualizing the relationships among all the connectivity parameters. From left to right: 1) Outer axes  $C_1 - C_2$  Inner axes  $C_3 - C_4$ ; 2) Outer axes  $C_1 - C_3$ ; Inner axes  $C_2 - C_4$ ; 3) Outer axes  $C_2 - C_3$ ; Inner axes  $C_1 - C_3$ ; 4) Outer axes  $C_3 - C_4$ ; Inner axes  $C_1 - C_2$

Clear patterns emerge in two different cases. When  $C_3$  ( $P \rightarrow I$ ) and  $C_4$  ( $I \rightarrow P$ ) are on the outer axes, a continuous change in the frequency of oscillation is observed. Similarly, when comparing  $C_1$  ( $P \rightarrow E$ ) against  $C_3$  ( $P \rightarrow I$ ), a concrete pattern is evident, with more pronounced changes in the frequency of oscillation when  $C_3$  is altered. These results reinforce the idea that the main loop influencing the frequency of oscillation is the interaction between the pyramidal and inhibitory populations, raising the question of whether adding an additional excitatory population is truly necessary, even though it would be more biologically realistic.

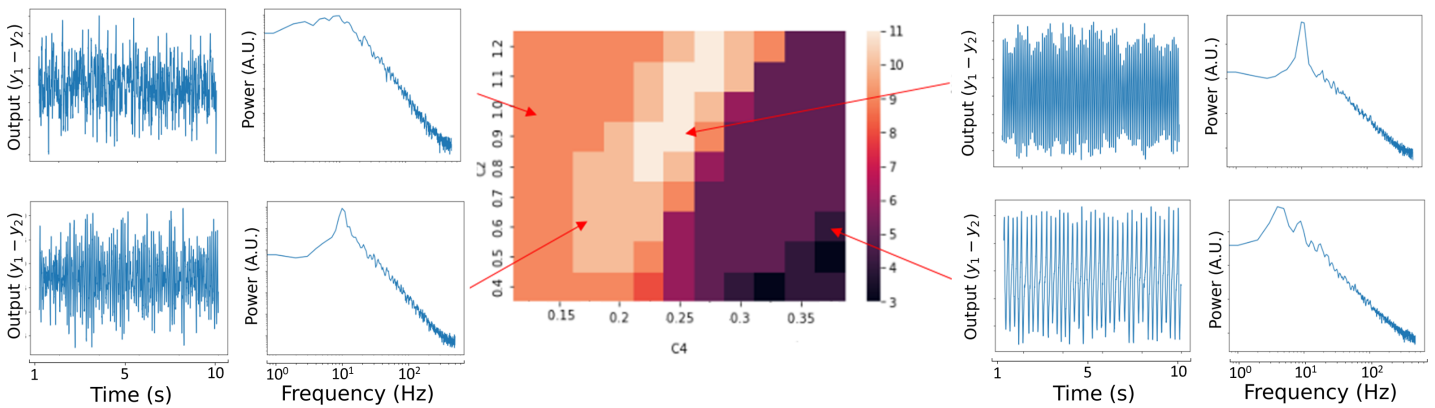

**Figure S7. Connection strength parameter space for  $C_2$  ( $E \rightarrow P$ ) and  $C_4$  ( $I \rightarrow P$ ) in JR.** Higher values of  $C_4$  lead to a decrease in rhythmic oscillations. The highest frequency of oscillation occurs when  $C_4$  is at a ratio of 0.25, and  $C_2$  is around 1.0. If  $C_4$  is too low, a very noisy signal is generated.

## S.6 Full Model Equations

2002

Partial and diagrammatic presentations of the differential equations for each of the four models are given in Figs. 5-8. In this final Supplementary section, we provide the complete differential equations for each model, as well as tables describing the model parameters and state variables.

2003

2004

2005

### Jansen-Rit model equations

2006

The differential equations for the JR model are

2007

$$\dot{y}_0(t) = y_3(t) \quad (44)$$

$$\dot{y}_3(t) = AaS[y_1(t) - y_2(t)] - 2ay_3(t) - a^2y_0(t) \quad (45)$$

$$\dot{y}_1(t) = y_4(t) \quad (46)$$

$$\dot{y}_4(t) = Aa(p(t) + C_2S[C_1y_0(t)]) - 2ay_4(t) - a^2y_1(t) \quad (47)$$

$$\dot{y}_2(t) = y_5(t) \quad (48)$$

$$\dot{y}_5(t) = BbC_4S[C_3y_0] - 2by_5(t) - b^2y_2(t) \quad (49)$$

Here and in the rest of this paper we have maintained the same notation as in Jansen and Rit (1995) where  $y_0$ ,  $y_1$ , and  $y_2$  correspond to the outputs of the pyramidal, excitatory, and inhibitory PSP block, respectively.  $p(t)$  represents the external input applied to the system, usually noise.  $A$  and  $B$  define the maximum amplitude of excitatory and inhibitory PSP, respectively.  $a$  and  $b$  represent the collective effect of the inverse of the time constant of the passive membrane and the entirety of the spatially dispersed delays within the dendritic network for the excitatory and inhibitory populations, respectively.  $C_1$  to  $C_4$  are the connectivity constants.

2008

2009

2010

2011

2012

2013

2014

2015

For the connectivity parameters, we wanted to mention that  $C_1$  and  $C_3$  slightly differ from  $C_2$  and  $C_4$  in the mathematical expression. The JR model assumes equal synaptic input from the pyramidal cell population to the other two populations, setting these constants to 1. In contrast, the synaptic coefficients at the excitatory and inhibitory dendrites are varied (corresponding to  $C_1$  ( $P \rightarrow E$ ) and  $C_3$  ( $P \rightarrow I$ )). Conversely, for pyramidal cells, the synaptic coefficients at their dendrites remain fixed (1 and -1 for excitatory and inhibitory interneurons, respectively), and excitatory and inhibitory neurons synapse onto pyramidal cells differently (represented by  $C_2$  ( $E \rightarrow P$ ) and  $C_4$  ( $I \rightarrow P$ )). Therefore,  $C_1$  and  $C_3$  function as synaptic coefficients, while  $C_2$  and  $C_4$  serve as connectivity constants, as illustrated in the detailed schematic. Mathematically, this means that  $C_1$  and  $C_3$  are applied within the nonlinear function, while  $C_2$  and  $C_4$  are applied outside. However, in practical terms, all these parameters are described as connectivity parameters and can be considered analogous and interrelated. Furthermore, all the values are scaled by a global connectivity parameter. See Cook et al. (2021) for a further explanation of this nuanced aspect of the JR model system.

2016

2017

2018

2019

2020

2021

2022

2023

2024

2025

2026

2027

2028

2029

| Original Symbol | Description                                                                                                                                                     | Value                                                         |
|-----------------|-----------------------------------------------------------------------------------------------------------------------------------------------------------------|---------------------------------------------------------------|
| $e_0$           | Firing rate at threshold                                                                                                                                        | $2.5 \text{ s}^{(-1)}$                                        |
| $V_0$           | Firing threshold                                                                                                                                                | 6 mV                                                          |
| r               | Slope reflecting the variance of firing thresholds within the population                                                                                        | $0.56 \text{ mV}^{(-1)}$                                      |
| A               | Maximum amplitude of excitatory PSP (EPSP)                                                                                                                      | 3.25 mV                                                       |
| B               | Maximum amplitude of inhibitory PSP (IPSP)                                                                                                                      | 22 mV                                                         |
| a and b         | Lumped representation of the sum of the reciprocal of the time constant of passive membrane and all other spatially distributed delays in the dendritic network | a = 100 $\text{s}^{(-1)}$<br>b = 50 $\text{s}^{(-1)}$         |
| $C_1$           | Connectivity constant: Represents the number of synapses made by the feed forward neurons to the dendrites of the excitatory feedback loop                      | $C = C_1$<br>135                                              |
| $C_2$           | Connectivity constant: Proportional to the number of synapses made by the excitatory feedback loop to the dendrites of the feedforward neurons                  | $C_2 = 0.8C$                                                  |
| $C_3$           | Connectivity constant: number of synapses made by the feedforward neurons to the dendrites of the inhibitory feedback loop                                      | $C_3 = 0.25C$                                                 |
| $C_4$           | Connectivity constant: Proportional to the number of synapses made by the inhibitory feedback loop to the dendrites of the feedforward neurons                  | $C_4 = 0.25C$                                                 |
| P(t)            | External pulse density consisting of activity originating from adjacent and more distant cortical columns and from subcortical structures (e.g. thalamus)       | For standard used uniform noise but can be normal or constant |

**Table 4.** *JR parameters with biological descriptions and corresponding values to generate alpha rhythm*

### Moran-David-Friston model equations

2030

The form of the differential equations for the MDF model are

2031

$$\dot{v}_1 = i_1 \quad (50)$$

$$\dot{i}_1 = \kappa_e H_e (\gamma_1 S(\nu_6 - a) + u) - 2\kappa_e i_1 - \kappa_e^2 \nu_1 \quad (51)$$

$$\dot{v}_2 = i_2 \quad (52)$$

$$\dot{i}_2 = \kappa_e H_e \gamma_2 S(\nu_1) - 2\kappa_e i_2 - \kappa_e^2 \nu_2 \quad (53)$$

$$\dot{v}_3 = i_3 \quad (54)$$

$$\dot{i}_3 = \kappa_i H_i \gamma_4 S(\nu_7) - 2\kappa_i i_3 - \kappa_i^2 \nu_3 \quad (55)$$

$$\dot{v}_6 = i_2 - i_3 \quad (56)$$

$$\dot{v}_4 = i_4 \quad (57)$$

$$\dot{i}_4 = \kappa_e H_e \gamma_3 S(\nu_6) - 2\kappa_e i_4 - \kappa_e^2 \nu_4 \quad (58)$$

$$\dot{v}_5 = i_5 \quad (59)$$

$$\dot{i}_5 = \kappa_i H_i \gamma_5 S(\nu_7) - 2\kappa_i i_5 - \kappa_i^2 \nu_5 \quad (60)$$

$$\dot{v}_7 = i_4 - i_5 \quad (61)$$

The  $v_i$  values represent the membrane potential of the subpopulations and  $i_i$  denoting their current. Specifically,  $v_1$  and  $i_1$  describe the excitatory interneurons,  $v_{2,3,6}$  and  $i_{2,3}$  the pyramidal cells, and finally  $v_{4,5,7}$  and  $i_{4,5}$  the inhibitory interneurons. The  $\gamma_i$  values are the connection strengths between the populations.  $H_e$  and  $\kappa_e$  are the maximum amplitude and the rate constant associated with EPSP, respectively. Similarly,  $H_i$  and  $\kappa_i$  represent the same parameters for the IPSP.

2032  
2033  
2034  
2035  
2036  
2037



| Original Symbol           | Description                                                                                                                             | Value                                                                   |
|---------------------------|-----------------------------------------------------------------------------------------------------------------------------------------|-------------------------------------------------------------------------|
| $\rho_1$                  | For shape of sigmoid: Can straighten more or less the slope                                                                             | 2                                                                       |
| $\rho_2$                  | For position of sigmoid: Can shift the curve right or left                                                                              | 1                                                                       |
| $H_e$                     | Maximum amplitude of excitatory PSP (EPSP)                                                                                              | 10 mV                                                                   |
| $H_i$                     | Maximum amplitude of inhibitory PSP (IPSP)                                                                                              | 22 mV                                                                   |
| $\kappa_e$ and $\kappa_i$ | Lumped representation of the sum of the rate constants of passive membrane and other spatially distributed delays in the dendritic tree | $\kappa_e = 250 \text{ s}^{(-1)}$<br>$\kappa_i = 62.5 \text{ s}^{(-1)}$ |
| $\gamma_1$                | Coupling strength: Between pyramidal cells and macro-column u (in excitatory spiny cells in granular layer)                             | 128                                                                     |
| $\gamma_2$                | Coupling strength: Between excitatory spiny cells in granular layer and pyramidal cells                                                 | 128                                                                     |
| $\gamma_3$                | Coupling strength: Between pyramidal cells(excitatory) and inhibitory interneurons                                                      | 64                                                                      |
| $\gamma_4$                | Coupling strength: Between inhibitory interneurons and pyramidal cells                                                                  | 64                                                                      |
| $\gamma_5$                | Coupling strength: Inhibitory-Inhibitory coupling (recurrent connection)                                                                | 1                                                                       |

**Table 5. MDF parameters with biological descriptions and corresponding values to generate alpha rhythm**

## Liley-Wright model equations

2038

For the LW model, the differential equations are

2039

$$\tau_e \dot{V}_e(t) = V_e^{rest} - V_e(t) + \psi_{ee}(V_e(t))I_{ee}(t) + \psi_{ie}(V_e(t))I_{ie}(t) \quad (62)$$

$$\tau_i \dot{V}_i(t) = V_i^{rest} - V_i(t) + \psi_{ei}(V_i(t))I_{ei}(t) + \psi_{ii}(V_i(t))I_{ii}(t) \quad (63)$$

$$\dot{I}_{ee} = U_{ee} \quad (64)$$

$$\dot{U}_{ee} = -2\gamma_e U_{ee}(t) - \gamma_e^2 I_{ee}(t) + \Gamma_e \gamma_e e(N_{ee}^\beta S(V_e(t)) + p_{ee}(t)) \quad (65)$$

$$\dot{I}_{ei} = U_{ei} \quad (66)$$

$$\dot{U}_{ei} = -2\gamma_e U_{ei}(t) - \gamma_e^2 I_{ei}(t) + \Gamma_e \gamma_e e(N_{ei}^\beta S(V_e(t)) + p_{ei}(t)) \quad (67)$$

$$\dot{I}_{ie} = U_{ie} \quad (68)$$

$$\dot{U}_{ie} = -2\gamma_i U_{ie}(t) - \gamma_i^2 I_{ie}(t) + \Gamma_i \gamma_i e(N_{ie}^\beta S(V_i(t))) \quad (69)$$

$$\dot{I}_{ii} = U_{ii} \quad (70)$$

$$\dot{U}_{ii} = -2\gamma_i U_{ii}(t) - \gamma_i^2 I_{ii}(t) + \Gamma_i \gamma_i e(N_{ii}^\beta S(V_i(t))) \quad (71)$$

$N_{xx}$  are the inter- and intra-connectivities between the two populations.  $p_{ei}$  and  $p_{ee}$  are the external inputs.  $I_{xx}$  are the postsynaptic potentials, and  $V_{xx}$  are the soma membrane

2040

2041

potentials.  $\Gamma_{e,i}$  and  $\gamma_{e,i}$  are the peak amplitude and rate constant PSPs for excitatory and inhibitory population, respectively. The model also includes passive membrane time constants represented by  $\tau_{e,i}$ , mean resting membrane potentials  $V_{e,i}^r$ , and mean equilibrium potentials  $V_{e,i}^{eq}$ .

| Original Symbol     | Description                                                                                                                            | Value                          |
|---------------------|----------------------------------------------------------------------------------------------------------------------------------------|--------------------------------|
| $S_{(e,i)}^{max}$   | Excitatory/Inhibitory population mean maximal firing rates                                                                             | 500, 500 s <sup>(-1)</sup>     |
| $\mu_{(e,i)}$       | Excitatory/Inhibitory population thresholds (spike threshold)                                                                          | -50, -50 mV                    |
| $\sigma_{(e,i)}$    | Standard deviation for spike-threshold in excitatory/inhibitory population                                                             | 5, 5 mV                        |
| $\Gamma_e$          | Excitatory postsynaptic potential peak amplitude (at the site of synaptic activation)                                                  | 0.71 mV                        |
| $\Gamma_i$          | Inhibitory postsynaptic potential peak amplitude (at the site of synaptic activation)                                                  | 0.71 mV                        |
| $\gamma_{(e,i)}$    | Excitatory/Inhibitory postsynaptic potential rate constant                                                                             | 300, 65 s <sup>(-1)</sup>      |
| $\tau_{(e,i)}$      | Passive membrane decay time constant                                                                                                   | 0.094, 0.042 s                 |
| $V_{(e,i)}^r$       | Mean resting membrane potential                                                                                                        | -70, -70 mV                    |
| $V_{(e,i)}^{eq}$    | Mean equilibrium potential associated with excitation or inhibition                                                                    | 45, -90 mV                     |
| $N_{(ee,ei)}^\beta$ | Total number of connections that a cell of type e, i receives from excitatory cells via intra-cortical fibres (Weight connections)     | 3000, 3000                     |
| $N_{(ie,ii)}^\beta$ | Total number of connections that a cell of type e,i receives from inhibitory cells via intra-cortical connections (Weight connections) | 500, 500                       |
| $p_{(ee,ei)}$       | Excitatory input to excitatory, inhibitory cells (extra-cortical input)                                                                | 3.460, 5.070 s <sup>(-1)</sup> |
| $p_{(ie,ii)}$       | Inhibitory input to excitatory, inhibitory cells (extra-cortical input)                                                                | 0, 0 s <sup>(-1)</sup>         |

**Table 7.** *LW parameters with biological descriptions and corresponding values to generate alpha rhythm*

### Robinson-Rennie-Wright model equations

Finally, the differential equations of the RRW are as follows

$$\frac{dV_e}{dt} = \dot{V}_e \quad (72)$$

$$\frac{d\dot{V}_e}{dt} = \alpha\beta[\nu_{ee}\phi_e + \nu_{ei}S(V_e) + \nu_{es}S(V_s(t - t_0/2)) - (\frac{1}{\alpha} + \frac{1}{\beta})\dot{V}_e - V_e] \quad (73)$$

$$\frac{dV_s}{dt} = \dot{V}_s \quad (74)$$

$$\frac{d\dot{V}_s}{dt} = \alpha\beta[\nu_{se}\phi_e(t - t_0/2) + \nu_{sr}S_r(V_r) + \nu_{sn}\phi_n - (\frac{1}{\alpha} + \frac{1}{\beta})\dot{V}_s - V_s] \quad (75)$$

$$\frac{dV_r}{dt} = \dot{V}_r \quad (76)$$

$$\frac{d\dot{V}_r}{dt} = \alpha\beta[\nu_{re}\phi_e(t - t_0/2) + \nu_{rs}S(V_s) - (\frac{1}{\alpha} + \frac{1}{\beta})\dot{V}_r - V_r] \quad (77)$$

$$\frac{d\phi_e}{dt} = \dot{\phi}_e \quad (78)$$

$$\frac{d\dot{\phi}_e}{dt} = \gamma_e^2[S(V_e) - \frac{2}{\gamma_e}\dot{\phi}_e - \phi_e] \quad (79)$$

with  $V_e$ ,  $V_r$ , and  $V_s$  representing the potential of the cortical population, of the reticular nucleus and of the relay nuclei, respectively.  $\nu_{xx}$  denote the connection strengths parameters.  $\alpha$  and  $\beta$  refer to the decay and rise time of the impulse response, representing the dendritic rate.  $t_0$  is the conduction delay between thalamic and cortical projections. Finally,  $\gamma_e$  stands for the cortical damping rate, which is exclusively applied to the cortical population. This final differential equation for determining  $\phi_e$  is related to the PDE damped wave equation, which was used to consider spatial variations (Robinson et al., 1997). However, in the case of spatial uniformity, the wave equation simplifies to an ODE (Zhao and Robinson, 2015).

| Original Symbol      | Description                                                                                                                     | Value                            |
|----------------------|---------------------------------------------------------------------------------------------------------------------------------|----------------------------------|
| $Q_{max}$            | Maximum attainable firing rate of individual neurons                                                                            | 340 $s^{(-1)}$                   |
| $\sigma'\pi\sqrt{3}$ | Standard deviation of the threshold distribution in the neural population                                                       | $3.8*\pi\sqrt{3} \approx 5.9$ mV |
| $\theta$             | Mean firing threshold                                                                                                           | 12.92 mV                         |
| $\gamma_e$           | Cortical damping rate (Axonal velocity/Range)                                                                                   | 116 $s^{(-1)}$                   |
| $1/\alpha$           | Decay time (of impulse response, dendritic rate)                                                                                | 83.33 $s^{-1}$                   |
| $1/\beta$            | Rise time (of impulse response, dendritic rate)                                                                                 | 769.23 $s^{-1}$                  |
| $t_0$                | Corticothalamic loop delay (Loop distance/Axonal velocity) which means conduction delay through thalamic nuclei and projections | 80 ms                            |
| $v_{ee}$             | $N_{ee}s_{ee}$ : Mean number of synapses X strength of the response to a unit signal                                            | 3.03 mVs                         |
| $-v_{ei}$            | $-N_{ei}s_{ei}$                                                                                                                 | 6.00 mVs                         |
| $v_{es}$             | $N_{es}s_{es}$                                                                                                                  | 2.06 mVs                         |
| $v_{se}$             | $N_{se}s_{se}$                                                                                                                  | 2.18 mVs                         |
| $-v_{sr}$            | $-N_{sr}s_{sr}$                                                                                                                 | 0.83 mVs                         |
| $v_{re}$             | $N_{re}s_{re}$                                                                                                                  | 0.33 mVs                         |
| $v_{rs}$             | $N_{rs}s_{rs}$                                                                                                                  | 0.03 mVs                         |
| $v_{sn}$             | $N_{sn}s_{sn}$                                                                                                                  | 0.98 mVs                         |

**Table 6.** *RRW parameters with biological descriptions and corresponding values to generate alpha rhythm*
